# Supplementary material for: Present-day geodynamics of the Western Alps: new insights from earthquake mechanisms
Source: Copernicus journal article supplement (doi:10.5194/se-12-1661-2021), 2021-07-21
Supplement: Supplementary file 1 [file Supplementary_revised2.pdf › Supplementary _revised090621/Supplementary_revised2.pdf]

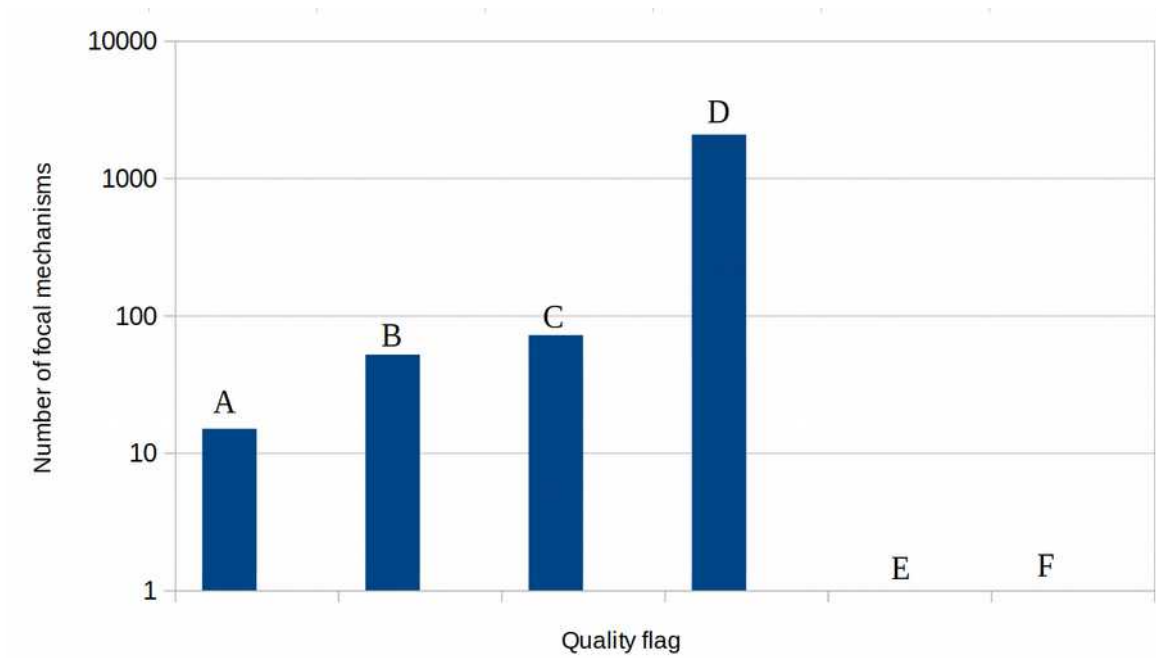

Figure S1. Histogram of quality flags distribution for the 2215 computed focal mechanisms according to HASH code (Hardebeck and Shearer, 2002). Quality flags are defined from “A” to “F” in HASH code. “A” quality mechanisms are the best constrained ones. No “E” or “F” events appear in the 2215 focal mechanisms dataset.

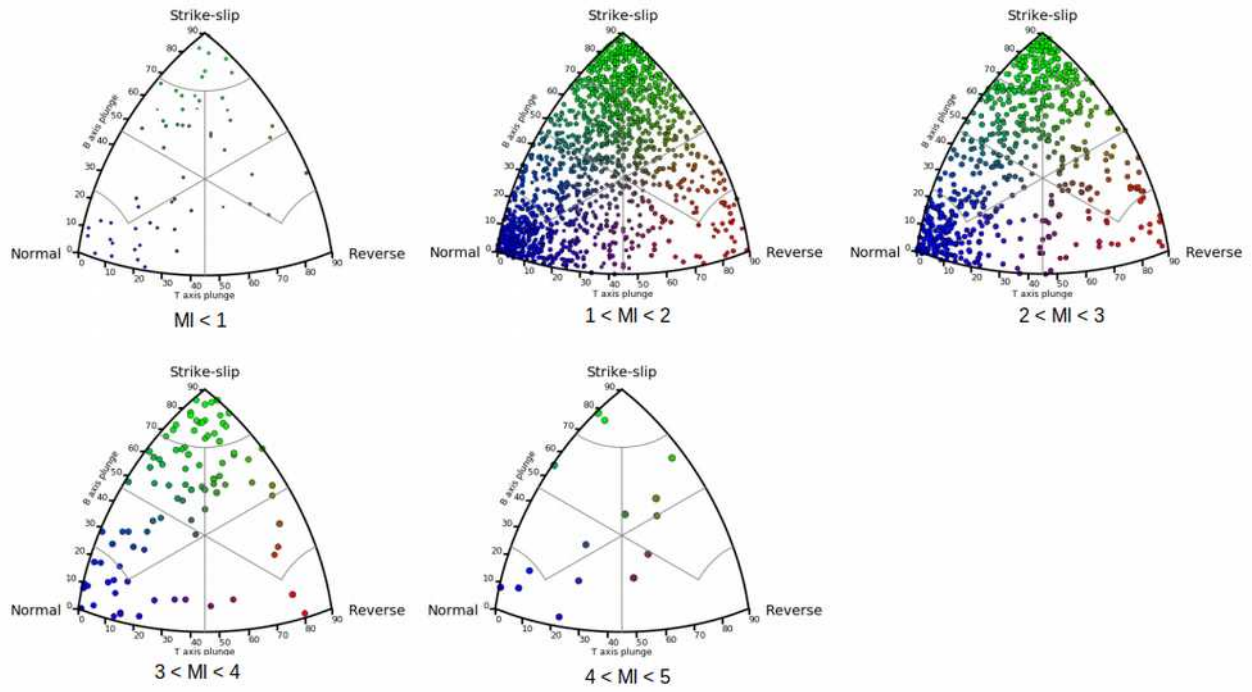

Figure S2. Kaverina diagrams per magnitude (MI) range, displaying the style of deformation of the mechanisms according to their T axis (tension axis) and B axis (null axis) plunges. Normal, reverse and strike-slip deformation style corresponding to vertical P, T and B axes is indicated by circles in blue, red and green color, respectively. The five magnitude ranges represent similar proportions of normal, strike-slip, and transtensive focal mechanisms.

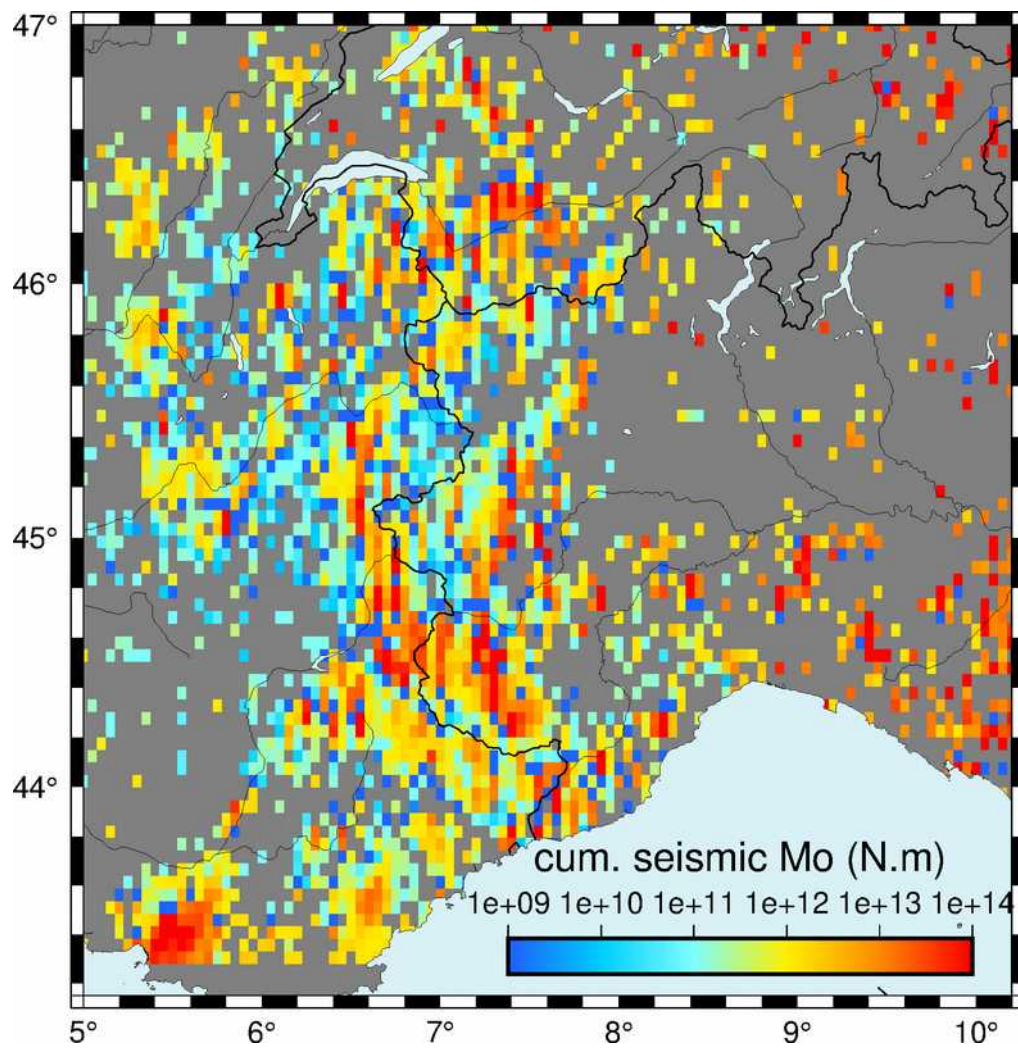

Figure S3. Raw map of the seismic moment ( $M_0$ ) computed for each event compiled in Potin (2016) having a local magnitude ( $M_l$ ) available, using Hanks and Kanamori (1979) relationship, and summed over the 1989-2014 time interval on  $0.05^\circ \times 0.05^\circ$  grid cells. Quarry blasts have not been removed.

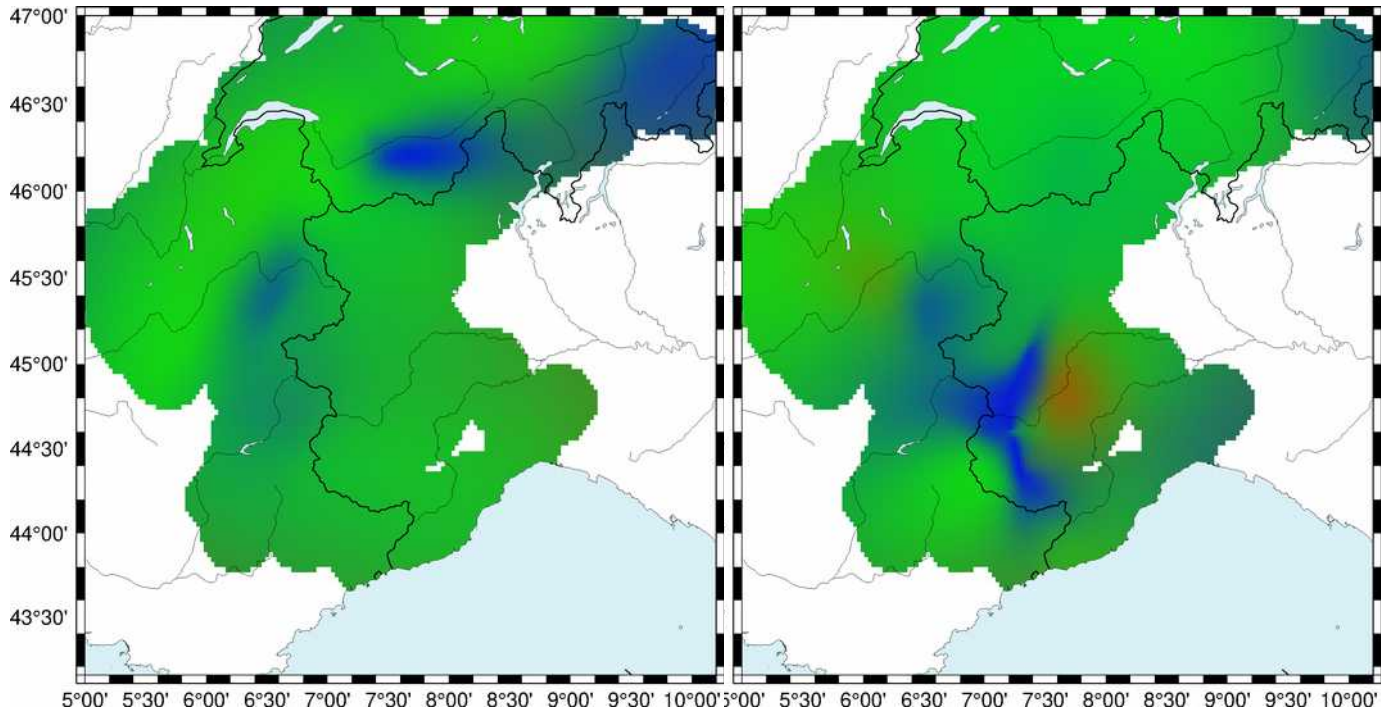

Figure S4. Mean values of the distributions of P, T, and B axes plunges resulting from a Bayesian inversion of focal mechanisms with depths in the 0-10 km range (left panel) and in the 10-30 km range (right panel). The color-code is according to the Kaverina classification of the style of deformation in Figure 2. Areas without focal mechanisms within 35 km are masked out, as well as mechanisms in the Ligurian sea, due to the lack of constraints.

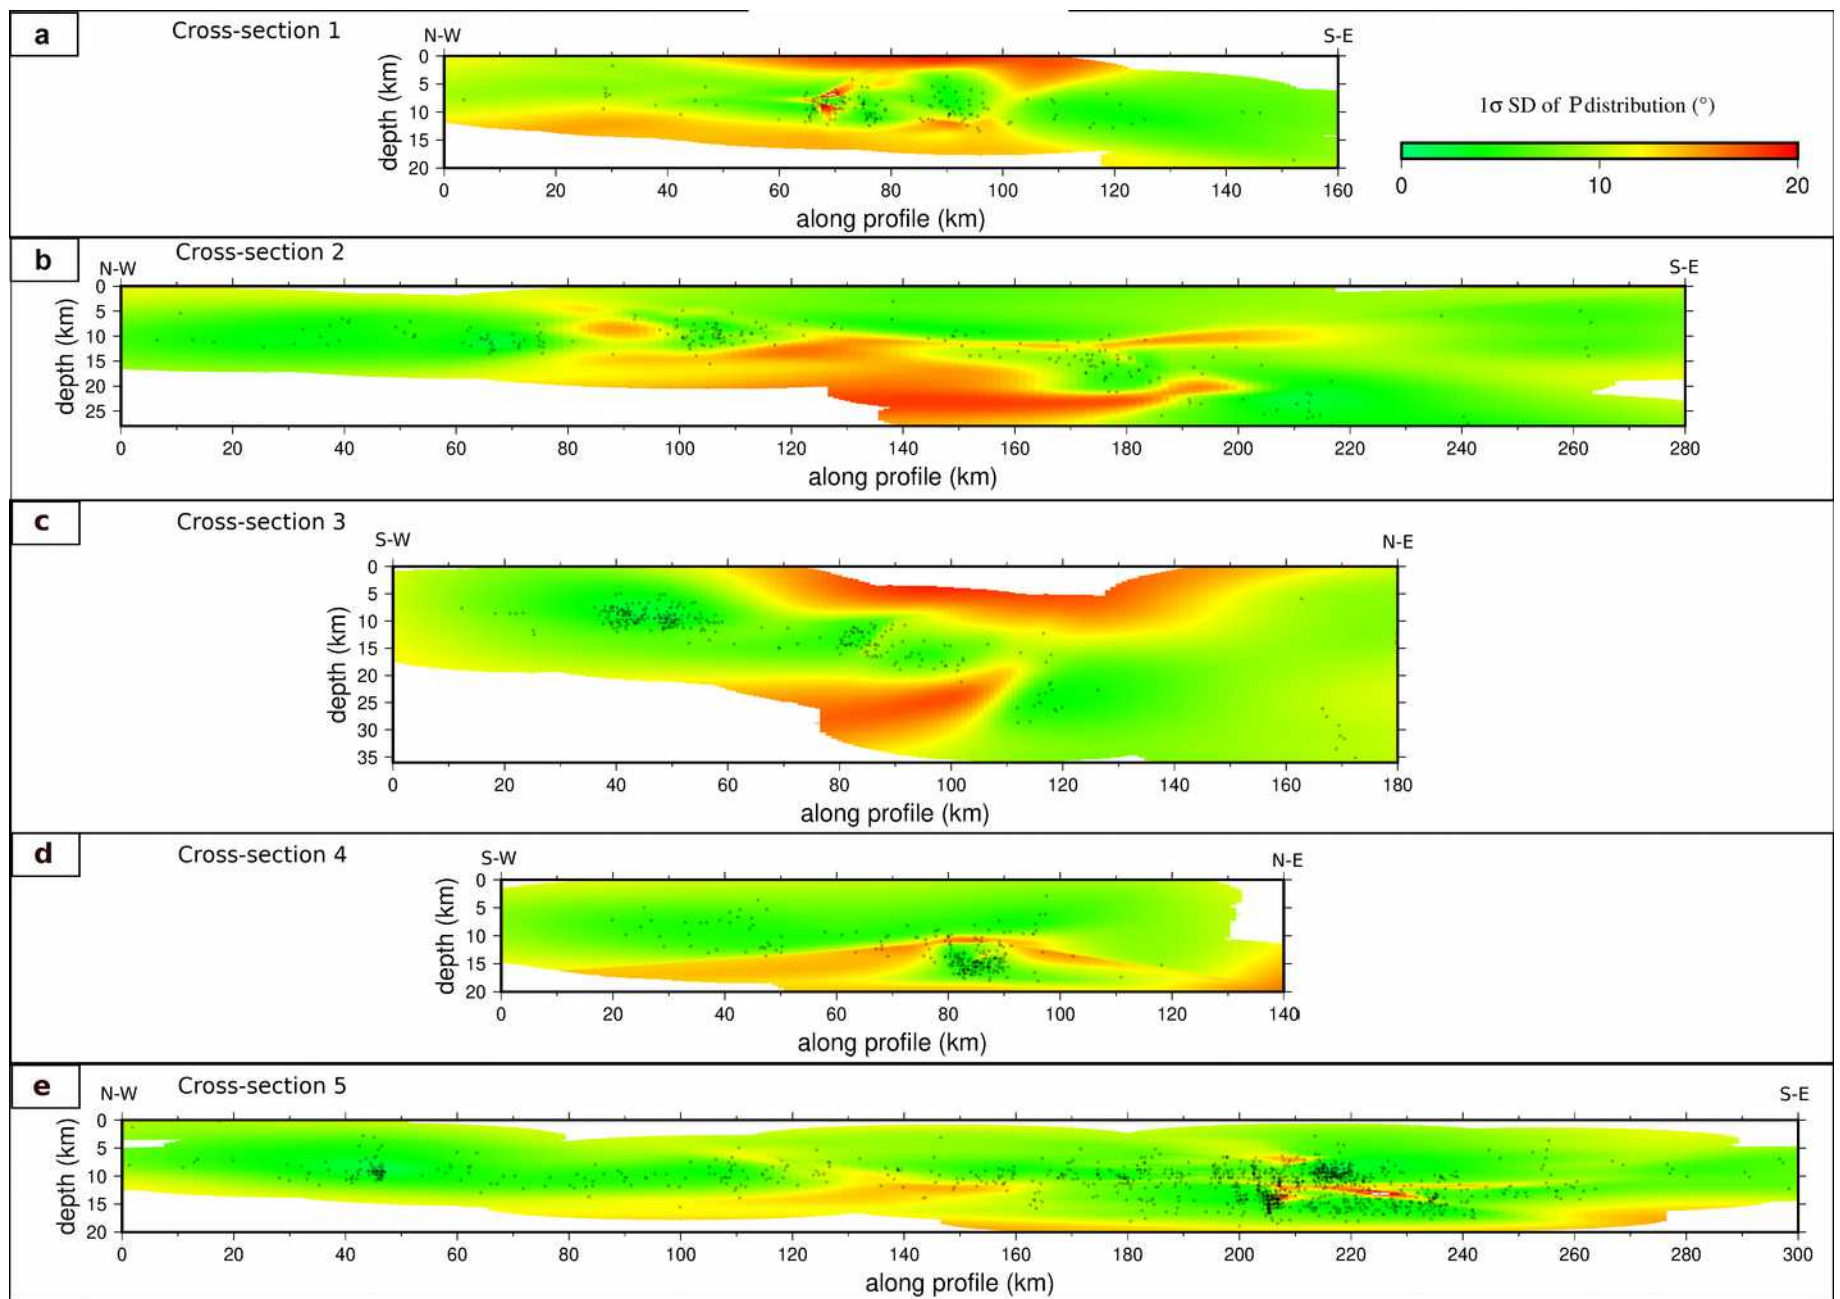

Figure S5. 1-sigma uncertainties (in degrees) on the mean values of P axis plunge distributions resulting from the Bayesian inversion displayed in Figure 9. The location of cross-sections are indicated on Figure 7.



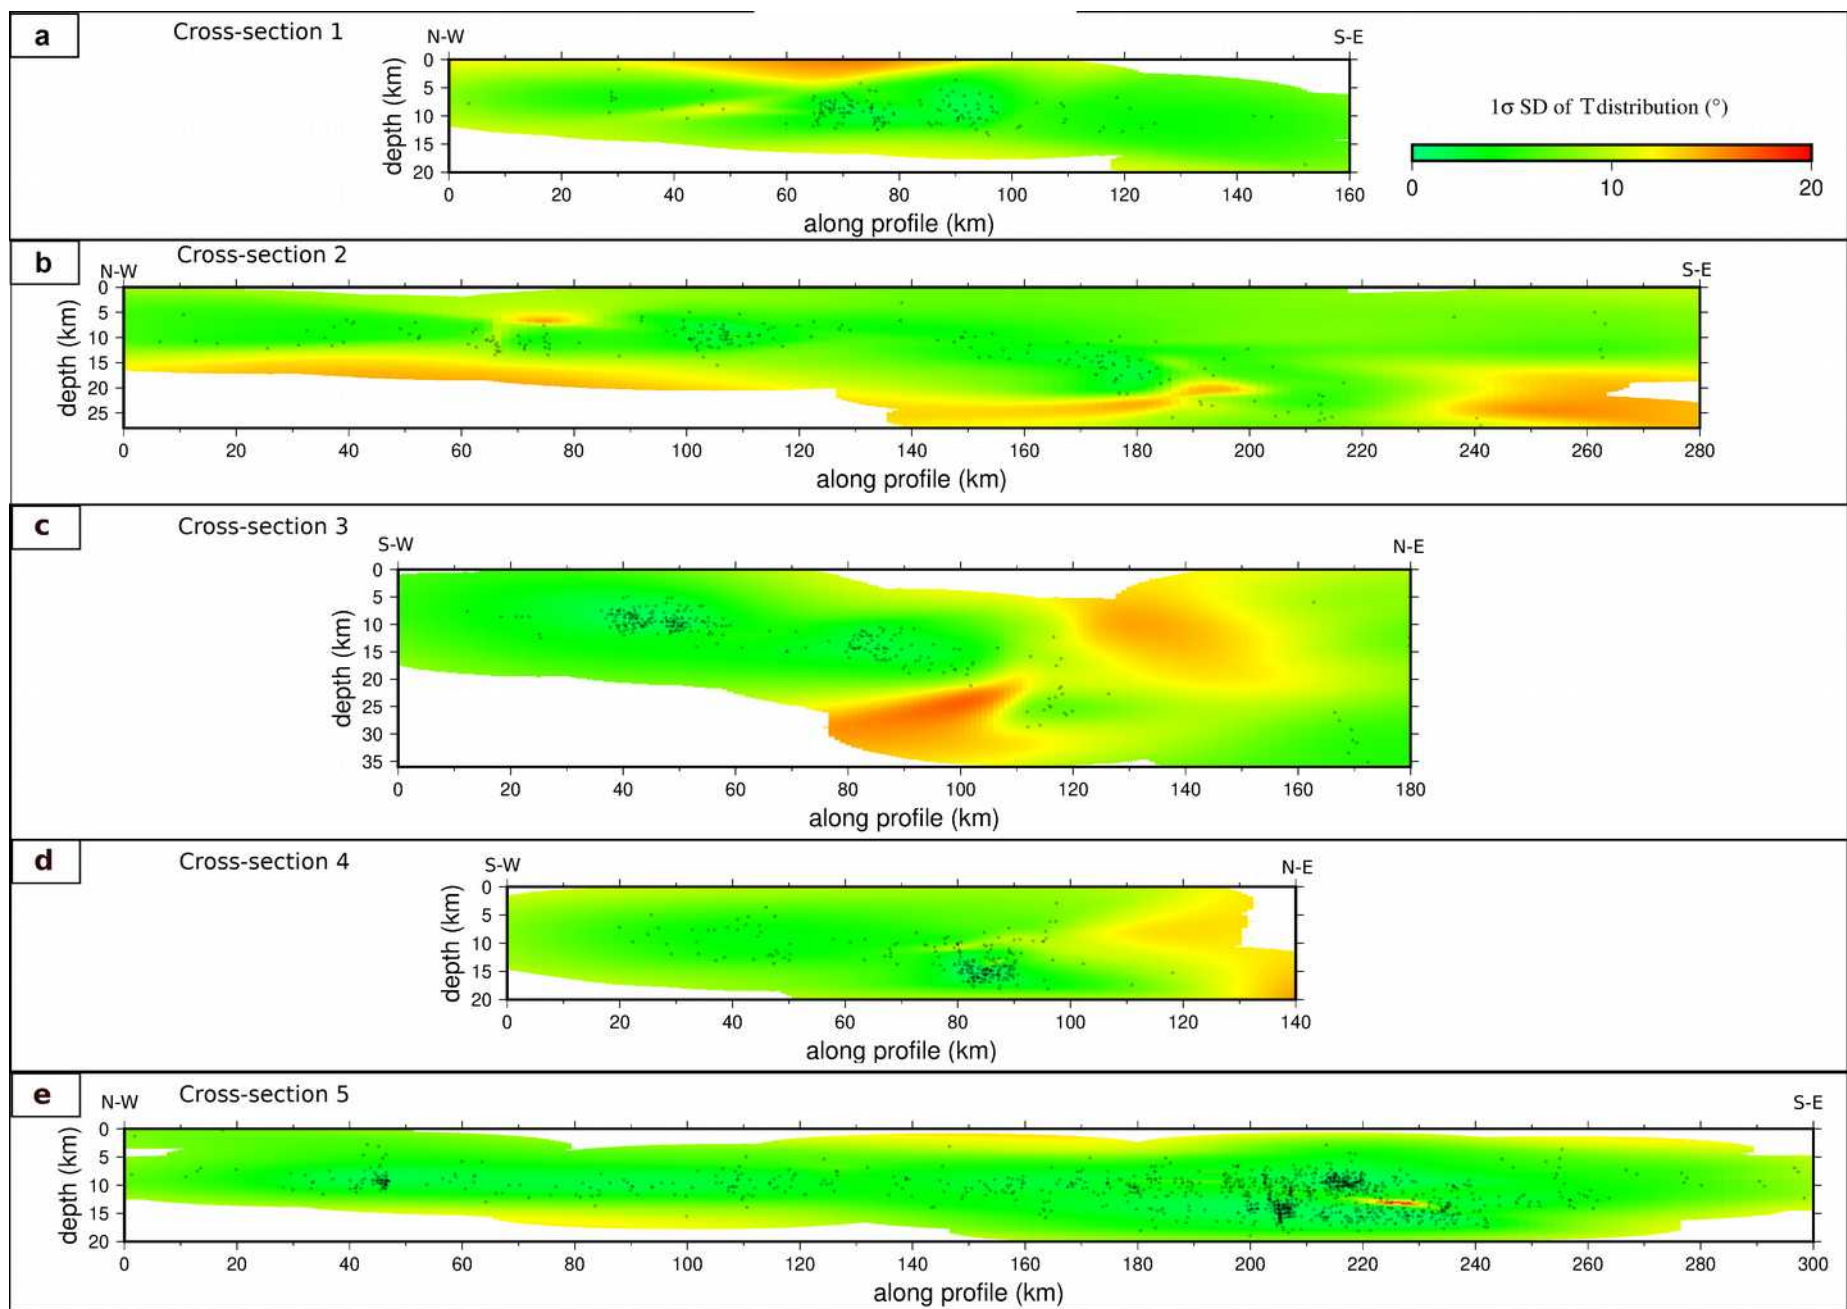

Figure S6. 1-sigma uncertainties (in degrees) on the mean values of T axis plunge distributions resulting from the Bayesian inversion displayed in Figure 9. The location of cross-sections are indicated on Figure 7.

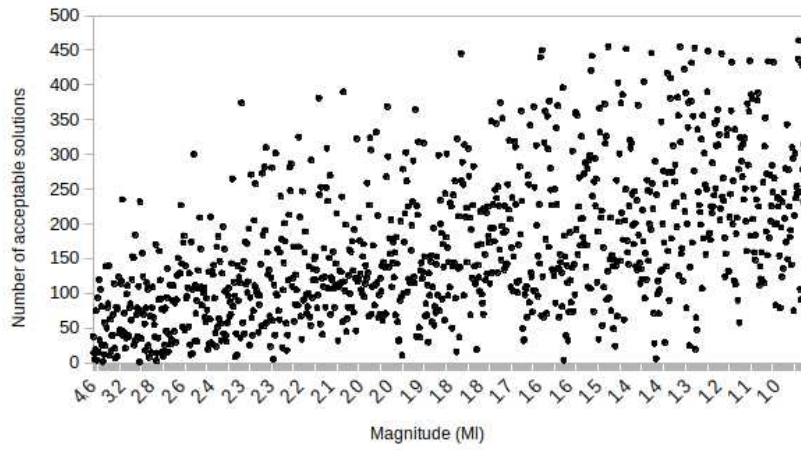

Figure S7. Scatter plot of the number of acceptable solutions defined by HASH code versus local magnitude for each computed focal mechanism. A trend can be identified, showing that more acceptable focal solutions are found for lower magnitude events, suggesting that the averaged retained focal mechanisms are less constrained in these cases.

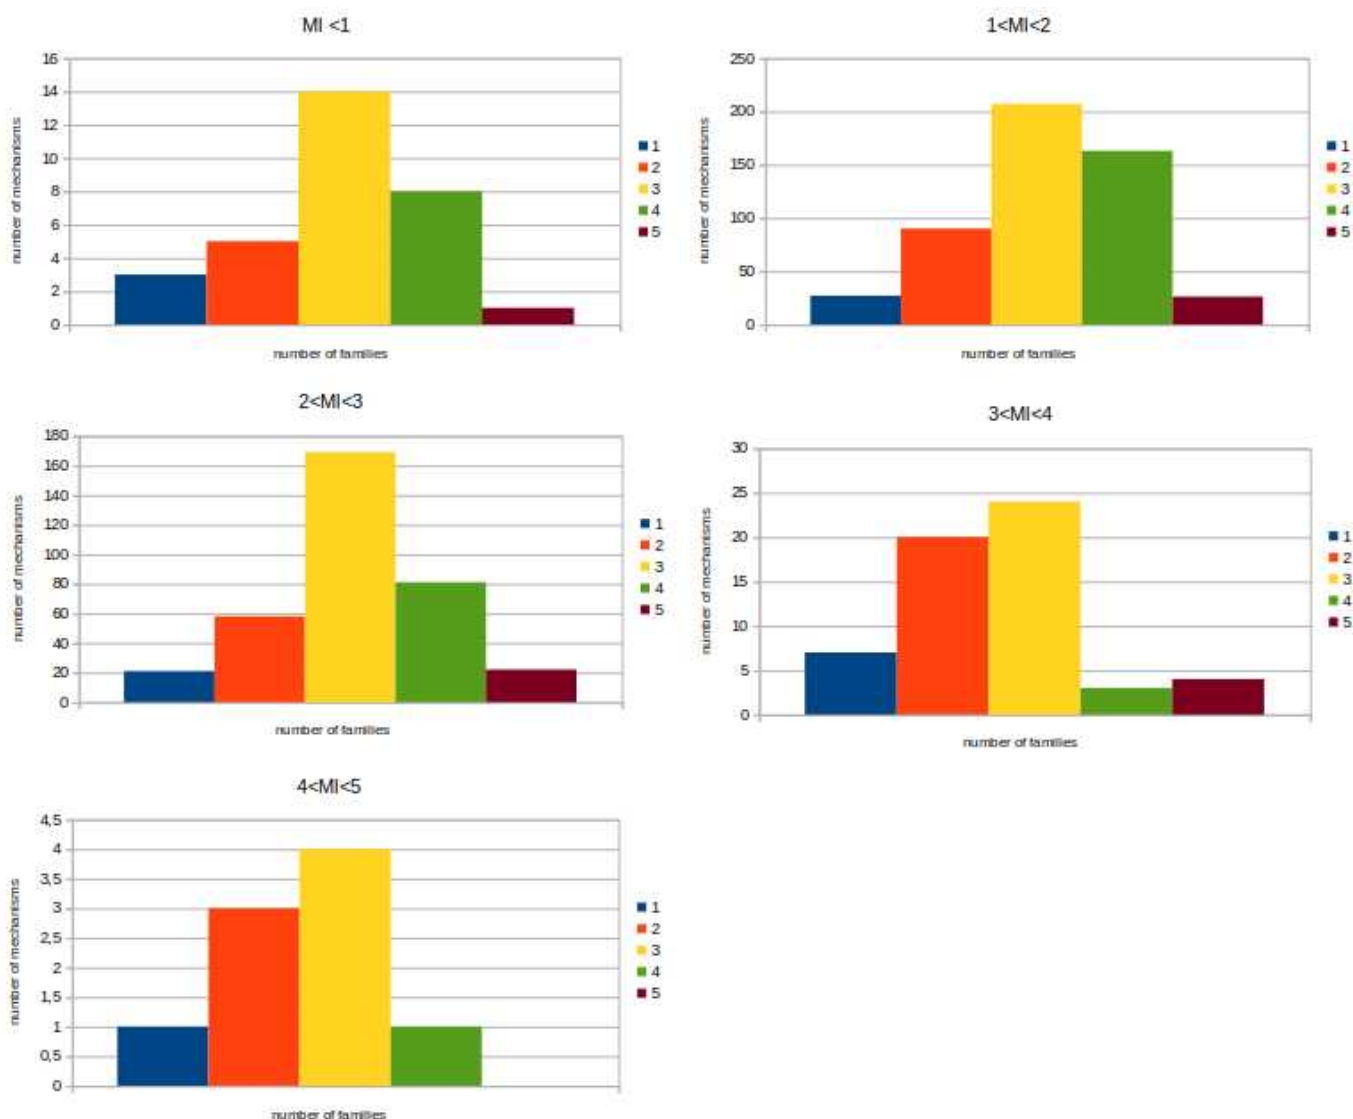

Figure S8. Number of focal mechanisms for which one, two, three, four or five different families (clustered outliers) our found during HASH implementation for five different magnitude ranges. While most of the focal mechanisms are associated with three different families of solutions, this figure shows that focal mechanisms of higher magnitudes are associated to less different possible families than focal mechanisms of smaller magnitude.

| max_gap_az | max_gap_toa | dist | dang | maxout | cangle | prob_max |
|------------|-------------|------|------|--------|--------|----------|
| 90         | 60          | 600  | 5.0  | 500    | 45     | 10       |

Table S1 : Input parameters used for HASH focal mechanism computation.

Table S2 : list of the focal mechanisms computed in this study. The columns are in the following order : year (« YEAR »), month (« MM »), day (« DD »), hour (« HH »), minutes (« MN »), seconds (« SEC »), magnitude (« MI », local magnitude), latitude (« Lat », decimal degrees), longitude (« Lon », decimal degrees), depth (« Depth », km), strike of the first plane (« Strike », in degrees), dip of the first plane (« Dip », in degrees), rake of the first plane (« Rake », in degrees), quality flag outputed by HASH (« Flag », from A to F).



| YEAR | MM | DD | HH | MN | SEC    | MI          | Lat     | Lon    | Depth | Strike | Dip | Rake | Flag | Multiple (*) |
|------|----|----|----|----|--------|-------------|---------|--------|-------|--------|-----|------|------|--------------|
| 1989 | 1  | 7  | 2  | 29 | 40.820 | 3,346.34017 | 7.54483 | 8.650  |       | 241    | 77  | -144 | D    |              |
| 1989 | 3  | 10 | 9  | 56 | 39.030 | 1,746.17117 | 7.45000 | 8.820  |       | 49     | 46  | -111 | D    |              |
| 1989 | 4  | 10 | 21 | 22 | 19.790 | 2,646.50433 | 6.39050 | -0.400 |       | 327    | 38  | -130 | D    |              |
| 1989 | 8  | 6  | 4  | 38 | 15.130 | 2,646.19700 | 7.73783 | 6.570  |       | 4      | 53  | -104 | D    |              |
| 1989 | 8  | 19 | 0  | 20 | 50.980 | 2,246.19733 | 7.73867 | 8.350  |       | 176    | 48  | -107 | D    |              |
| 1989 | 9  | 24 | 16 | 50 | 9.860  | 2,144.57267 | 6.86300 | 13.830 |       | 319    | 62  | -155 | D    |              |
| 1989 | 9  | 29 | 8  | 39 | 46.110 | 2,244.47517 | 7.30250 | 11.070 |       | 18     | 77  | -133 | D    |              |
| 1989 | 9  | 30 | 4  | 41 | 1.600  | 3,446.32516 | 7.39750 | 9.560  |       | 301    | 88  | -167 | D    |              |
| 1989 | 9  | 30 | 5  | 26 | 42.830 | 2,246.31833 | 7.40950 | 9.480  |       | 290    | 87  | 117  | D    |              |
| 1989 | 10 | 5  | 12 | 32 | 15.300 | 2,546.19783 | 6.95967 | 10.350 |       | 93     | 64  | -140 | D    |              |
| 1989 | 10 | 26 | 4  | 44 | 40.290 | 1,944.32084 | 7.26667 | 10.030 |       | 88     | 84  | 157  | D    |              |
| 1989 | 10 | 30 | 11 | 24 | 5.390  | 3,244.62350 | 7.25000 | 12.790 |       | 318    | 74  | -132 | D    |              |
| 1989 | 11 | 17 | 13 | 39 | 13.530 | 1,646.31267 | 7.40183 | 7.310  |       | 268    | 73  | -178 | D    |              |
| 1989 | 11 | 18 | 1  | 50 | 9.130  | 1,545.93467 | 7.20233 | 8.460  |       | 23     | 67  | -117 | D    |              |
| 1989 | 11 | 26 | 12 | 10 | 11.070 | 2,546.31167 | 6.70700 | 7.500  |       | 250    | 76  | 120  | D    |              |
| 1989 | 11 | 28 | 2  | 52 | 30.230 | 2,146.32450 | 7.40983 | 9.300  |       | 333    | 64  | -84  | D    |              |
| 1989 | 12 | 2  | 8  | 56 | 30.540 | 2,144.72550 | 7.23617 | 16.360 |       | 205    | 42  | -89  | D    |              |
| 1989 | 12 | 3  | 20 | 13 | 20.320 | 1,346.32433 | 7.60483 | 9.480  |       | 262    | 87  | -172 | D    |              |
| 1989 | 12 | 13 | 8  | 8  | 13.240 | 2,644.81000 | 6.73150 | 8.840  |       | 189    | 44  | -115 | D    |              |
| 1989 | 12 | 16 | 5  | 0  | 27.780 | 2,344.14783 | 6.81683 | 13.070 |       | 319    | 90  | 159  | D    |              |
| 1990 | 1  | 4  | 2  | 30 | 49.140 | 1,946.04317 | 7.23333 | 7.440  |       | 61     | 23  | -108 | D    |              |
| 1990 | 1  | 10 | 14 | 13 | 20.050 | 244.52183   | 7.28400 | 17.390 |       | 14     | 77  | -120 | D    |              |
| 1990 | 1  | 20 | 19 | 25 | 19.380 | 2,745.15883 | 7.11117 | 9.140  |       | 317    | 86  | -157 | D    |              |
| 1990 | 2  | 11 | 7  | 0  | 37.000 | 3,944.92867 | 7.58783 | 12.270 |       | 175    | 86  | 141  | D    |              |
| 1990 | 3  | 2  | 16 | 20 | 32.860 | 2,246.32600 | 7.41817 | 7.170  |       | 288    | 51  | -89  | C    |              |
| 1990 | 3  | 4  | 0  | 22 | 34.300 | 2,444.86950 | 6.65000 | 9.700  |       | 46     | 32  | -95  | D    |              |
| 1990 | 3  | 10 | 19 | 6  | 54.160 | 2,145.03367 | 6.76950 | 11.780 |       | 96     | 75  | 163  | D    |              |
| 1990 | 3  | 11 | 9  | 5  | 21.650 | 2,544.97550 | 7.34783 | 14.460 |       | 246    | 10  | -48  | D    |              |
| 1990 | 3  | 26 | 1  | 51 | 27.860 | 2,144.75100 | 6.68817 | 6.730  |       | 288    | 70  | -163 | D    |              |
| 1990 | 4  | 15 | 7  | 50 | 36.070 | 3,843.61383 | 7.76350 | 19.450 |       | 309    | 69  | -159 | D    |              |
| 1990 | 6  | 3  | 19 | 27 | 25.270 | 246.29833   | 7.29833 | 7.140  |       | 96     | 56  | 160  | D    |              |
| 1990 | 6  | 4  | 8  | 30 | 33.620 | 2,544.60800 | 7.23050 | 15.680 |       | 202    | 51  | -86  | D    |              |
| 1990 | 7  | 19 | 23 | 38 | 34.630 | 146.32550   | 7.41433 | 7.980  |       | 300    | 82  | -143 | D    |              |
| 1990 | 7  | 26 | 12 | 30 | 13.680 | 2,246.32817 | 7.40083 | 10.160 |       | 292    | 89  | -140 | B    |              |
| 1990 | 7  | 31 | 16 | 35 | 3.080  | 2,544.56283 | 7.32167 | 14.000 |       | 26     | 39  | -119 | D    |              |
| 1990 | 8  | 13 | 10 | 52 | 46.070 | 1,246.32733 | 7.39883 | 8.590  |       | 296    | 84  | -123 | D    |              |
| 1990 | 8  | 23 | 5  | 42 | 18.280 | 246.25383   | 7.40817 | 8.740  |       | 262    | 88  | -156 | D    |              |
| 1990 | 8  | 24 | 5  | 12 | 57.890 | 243.93983   | 7.26883 | 10.010 |       | 208    | 80  | 65   | D    |              |
| 1990 | 8  | 31 | 10 | 57 | 5.400  | 1,646.27850 | 7.46400 | 11.170 |       | 82     | 85  | 151  | D    |              |
| 1990 | 10 | 29 | 2  | 13 | 0.050  | 244.58833   | 6.89783 | 9.660  |       | 310    | 48  | -134 | D    |              |
| 1990 | 11 | 22 | 15 | 51 | 18.710 | 346.91217   | 9.01583 | 7.550  |       | 249    | 81  | 150  | D    |              |
| 1990 | 11 | 22 | 22 | 10 | 53.380 | 2,144.49483 | 7.28550 | 15.760 |       | 3      | 77  | -149 | D    |              |
| 1990 | 12 | 11 | 16 | 45 | 13.530 | 2,345.04333 | 7.36817 | 21.190 |       | 31     | 45  | -83  | D    |              |
| 1990 | 12 | 16 | 14 | 7  | 41.410 | 2,246.80867 | 7.56450 | 11.890 |       | 110    | 83  | 180  | D    |              |
| 1990 | 12 | 17 | 23 | 34 | 45.070 | 1,346.22417 | 7.65067 | 9.080  |       | 103    | 50  | -106 | B    |              |
| 1990 | 12 | 20 | 0  | 18 | 59.520 | 246.12000   | 6.87200 | 7.460  |       | 78     | 84  | 108  | D    |              |
| 1990 | 12 | 30 | 10 | 11 | 50.320 | 1,944.83117 | 7.27383 | 17.540 |       | 99     | 69  | -138 | D    |              |
| 1991 | 1  | 14 | 3  | 23 | 46.620 | 1,746.32150 | 7.40650 | 9.480  |       | 136    | 66  | -139 | D    |              |
| 1991 | 2  | 1  | 15 | 20 | 20.340 | 2,244.73617 | 6.70800 | 6.660  |       | 205    | 22  | 15   | D    |              |
| 1991 | 2  | 7  | 0  | 46 | 54.160 | 2,444.43350 | 6.91567 | 11.380 |       | 344    | 76  | -158 | D    |              |
| 1991 | 2  | 11 | 15 | 43 | 42.380 | 3,944.88433 | 6.76983 | 7.590  |       | 318    | 85  | 160  | D    |              |
| 1991 | 2  | 13 | 12 | 54 | 41.740 | 2,944.87667 | 6.75617 | 7.560  |       | 137    | 71  | -156 | D    |              |

|      |    |    |    |    |        |     |          |         |        |     |    |        |
|------|----|----|----|----|--------|-----|----------|---------|--------|-----|----|--------|
| 1991 | 2  | 13 | 15 | 49 | 38.480 | 3,1 | 44.87350 | 6.75950 | 7.190  | 145 | 90 | -168 C |
| 1991 | 2  | 19 | 15 | 17 | 16.850 | 2,2 | 44.44050 | 7.33183 | 7.310  | 165 | 85 | 138 D  |
| 1991 | 2  | 20 | 4  | 31 | 10.790 | 1,9 | 45.90100 | 7.16983 | 9.510  | 181 | 84 | -162 D |
| 1991 | 2  | 25 | 11 | 30 | 10.760 | 2,8 | 44.05567 | 7.67050 | 7.810  | 93  | 44 | -156 D |
| 1991 | 3  | 19 | 5  | 19 | 18.780 | 1,9 | 46.35966 | 6.98100 | 9.190  | 225 | 63 | 135 D  |
| 1991 | 4  | 20 | 18 | 14 | 0.010  | 1,2 | 44.96117 | 6.98933 | 11.320 | 180 | 82 | -168 D |
| 1991 | 4  | 23 | 5  | 52 | 37.870 | 1,8 | 44.47317 | 6.72550 | 11.430 | 198 | 87 | -118 D |
| 1991 | 5  | 6  | 16 | 41 | 17.910 | 2,2 | 46.86417 | 6.76967 | 26.660 | 110 | 82 | -159 D |
| 1991 | 5  | 29 | 20 | 24 | 40.750 | 3,2 | 44.98050 | 8.16967 | 5.950  | 310 | 36 | -174 D |
| 1991 | 6  | 18 | 23 | 49 | 52.320 | 2,2 | 44.31116 | 7.24967 | 11.460 | 77  | 32 | 131 D  |
| 1991 | 7  | 29 | 8  | 46 | 16.380 | 1,7 | 44.85383 | 7.21817 | 14.260 | 194 | 61 | -120 D |
| 1991 | 8  | 12 | 22 | 56 | 8.640  | 2,3 | 44.81000 | 6.75183 | 9.070  | 176 | 55 | -102 D |
| 1991 | 9  | 7  | 18 | 9  | 20.550 | 2,3 | 46.22933 | 7.93583 | 11.750 | 53  | 84 | 128 C  |
| 1991 | 9  | 10 | 3  | 5  | 13.980 | 1,9 | 46.32450 | 7.46433 | 4.210  | 14  | 81 | 106 D  |
| 1991 | 9  | 16 | 21 | 28 | 45.260 | 1,7 | 45.91350 | 6.93583 | 5.740  | 23  | 88 | -145 D |
| 1991 | 11 | 10 | 12 | 55 | 9.190  | 1,8 | 46.29683 | 7.32750 | 5.950  | 87  | 79 | 132 D  |
| 1991 | 11 | 21 | 11 | 46 | 49.000 | 2,5 | 46.27683 | 7.49950 | 9.760  | 267 | 72 | -152 D |
| 1991 | 11 | 27 | 12 | 18 | 25.060 | 1,7 | 44.52783 | 6.87767 | 10.090 | 20  | 45 | -96 D  |
| 1991 | 12 | 1  | 9  | 19 | 36.620 | 2   | 44.48000 | 6.92700 | 8.790  | 129 | 90 | 164 D  |
| 1991 | 12 | 2  | 3  | 22 | 9.410  | 1,9 | 44.62050 | 6.94550 | 14.230 | 305 | 87 | -142 D |
| 1992 | 1  | 2  | 2  | 12 | 25.670 | 2,3 | 44.42850 | 6.47750 | 8.110  | 147 | 89 | 168 D  |
| 1992 | 1  | 9  | 4  | 51 | 9.810  | 1,9 | 43.97317 | 7.70683 | 10.780 | 269 | 75 | 157 D  |
| 1992 | 1  | 10 | 1  | 52 | 43.580 | 2,3 | 43.93933 | 7.72700 | 10.620 | 186 | 73 | -113 D |
| 1992 | 1  | 21 | 1  | 21 | 45.370 | 2,5 | 43.59417 | 8.14650 | 32.890 | 98  | 73 | 168 D  |
| 1992 | 1  | 23 | 3  | 16 | 2.260  | 1,8 | 44.58783 | 7.23783 | 15.520 | 186 | 26 | -99 D  |
| 1992 | 2  | 6  | 22 | 28 | 26.960 | 1,9 | 44.87183 | 7.28650 | 16.730 | 23  | 74 | -126 D |
| 1992 | 2  | 17 | 19 | 23 | 12.710 | 3,3 | 46.72733 | 9.53217 | 6.990  | 88  | 83 | -102 D |
| 1992 | 3  | 9  | 1  | 54 | 33.910 | 2,3 | 45.16083 | 5.87250 | 8.600  | 207 | 73 | 151 D  |
| 1992 | 3  | 17 | 11 | 31 | 44.730 | 2   | 44.50217 | 7.25783 | 14.590 | 208 | 43 | -85 D  |
| 1992 | 3  | 18 | 14 | 28 | 41.430 | 2,1 | 44.61533 | 7.23767 | 14.100 | 20  | 39 | -101 D |
| 1992 | 3  | 19 | 15 | 47 | 44.320 | 2,5 | 44.58200 | 7.25700 | 13.490 | 200 | 51 | -98 D  |
| 1992 | 3  | 28 | 19 | 24 | 15.570 | 3,2 | 46.73800 | 9.52083 | 8.700  | 141 | 40 | -95 D  |
| 1992 | 3  | 29 | 16 | 24 | 26.480 | 2,7 | 46.73900 | 9.52067 | 8.700  | 334 | 43 | -90 D  |
| 1992 | 4  | 3  | 5  | 20 | 34.700 | 1,7 | 44.54233 | 7.04150 | 11.770 | 8   | 64 | 144 D  |
| 1992 | 4  | 11 | 6  | 56 | 51.340 | 1,7 | 44.47300 | 6.71933 | 11.360 | 56  | 37 | -52 D  |
| 1992 | 4  | 19 | 22 | 24 | 52.330 | 2,4 | 44.27850 | 6.22467 | 5.320  | 349 | 73 | 122 D  |
| 1992 | 4  | 27 | 13 | 22 | 36.370 | 2,3 | 44.46717 | 7.30367 | 12.710 | 42  | 47 | -101 D |
| 1992 | 5  | 4  | 2  | 2  | 49.080 | 2,3 | 43.65933 | 7.80000 | 18.080 | 91  | 67 | 165 D  |
| 1992 | 6  | 3  | 0  | 50 | 23.080 | 2,2 | 44.30333 | 7.35983 | 16.730 | 330 | 38 | -70 D  |
| 1992 | 6  | 17 | 0  | 47 | 10.230 | 2,6 | 45.20483 | 7.46333 | 15.190 | 245 | 87 | -166 D |
| 1992 | 9  | 6  | 14 | 19 | 43.170 | 2,3 | 45.12850 | 7.63067 | 23.350 | 208 | 53 | 147 D  |
| 1992 | 9  | 13 | 5  | 0  | 36.530 | 3,1 | 45.13700 | 7.66617 | 23.600 | 25  | 90 | 161 D  |
| 1992 | 9  | 14 | 13 | 20 | 8.820  | 2,2 | 44.90500 | 6.63167 | 6.840  | 19  | 26 | -88 D  |
| 1992 | 10 | 8  | 2  | 7  | 30.070 | 1,8 | 44.60350 | 7.23000 | 13.580 | 189 | 35 | -53 D  |
| 1992 | 10 | 27 | 3  | 12 | 30.790 | 2,1 | 44.50100 | 7.25883 | 14.590 | 137 | 88 | -180 D |
| 1992 | 11 | 1  | 11 | 45 | 14.890 | 2,7 | 44.64734 | 6.79467 | 8.300  | 15  | 58 | 122 B  |
| 1992 | 11 | 9  | 13 | 11 | 38.560 | 1,8 | 44.30467 | 7.35200 | 16.220 | 112 | 89 | 136 D  |
| 1992 | 11 | 11 | 0  | 59 | 52.530 | 2,2 | 44.49933 | 7.26683 | 14.160 | 336 | 49 | -89 D  |
| 1992 | 11 | 27 | 2  | 53 | 33.820 | 2,1 | 44.52783 | 7.25800 | 14.850 | 212 | 37 | -99 D  |
| 1992 | 12 | 1  | 1  | 41 | 58.150 | 2,5 | 44.06683 | 7.68017 | 7.470  | 194 | 83 | -122 D |
| 1992 | 12 | 1  | 3  | 26 | 16.130 | 2   | 44.06833 | 7.68083 | 8.000  | 178 | 85 | 172 D  |
| 1992 | 12 | 1  | 19 | 41 | 34.830 | 2,1 | 44.53933 | 6.86833 | 8.200  | 135 | 29 | -127 D |
| 1992 | 12 | 28 | 3  | 14 | 43.340 | 2,7 | 45.77067 | 5.52567 | 10.700 | 81  | 90 | -158 D |

|      |    |    |    |           |              |         |        |     |    |        |
|------|----|----|----|-----------|--------------|---------|--------|-----|----|--------|
| 1993 | 2  | 1  | 2  | 58 14.980 | 1,7 44.12417 | 6.94950 | 6.840  | 263 | 87 | 102 D  |
| 1993 | 2  | 15 | 12 | 15 2.380  | 2 44.34017   | 7.30817 | 15.100 | 324 | 54 | -82 B  |
| 1993 | 2  | 21 | 12 | 13 0.380  | 2,4 45.41967 | 5.15283 | 13.600 | 90  | 89 | -176 D |
| 1993 | 3  | 7  | 6  | 0 28.930  | 1,6 45.77217 | 6.27050 | 5.180  | 51  | 54 | 88 D   |
| 1993 | 3  | 15 | 6  | 37 10.830 | 2,7 43.91350 | 7.84867 | 8.960  | 92  | 82 | -145 D |
| 1993 | 3  | 15 | 23 | 43 29.170 | 3,4 44.36617 | 7.31450 | 14.550 | 114 | 51 | -128 C |
| 1993 | 3  | 16 | 0  | 34 58.080 | 1,4 44.35067 | 7.30733 | 15.350 | 72  | 86 | -141 D |
| 1993 | 3  | 22 | 4  | 27 2.240  | 1,6 44.47417 | 6.91717 | 10.210 | 138 | 81 | 169 D  |
| 1993 | 3  | 29 | 15 | 57 20.900 | 1,3 44.40067 | 7.27333 | 16.670 | 132 | 85 | -156 D |
| 1993 | 4  | 7  | 16 | 36 2.940  | 1,7 44.42000 | 7.21967 | 11.460 | 291 | 58 | 132 D  |
| 1993 | 4  | 10 | 17 | 54 25.160 | 1,9 44.44217 | 7.30283 | 14.680 | 158 | 72 | 178 D  |
| 1993 | 4  | 14 | 10 | 32 6.180  | 2,5 44.25917 | 6.24867 | 6.250  | 270 | 3  | 65 D   |
| 1993 | 4  | 14 | 10 | 33 6.140  | 2,3 44.25367 | 6.25933 | 6.860  | 31  | 83 | 121 D  |
| 1993 | 4  | 16 | 9  | 12 25.670 | 1,4 44.25950 | 6.25350 | 6.460  | 7   | 39 | -97 D  |
| 1993 | 4  | 19 | 21 | 59 31.120 | 2 44.43133   | 7.29583 | 15.660 | 260 | 40 | -73 D  |
| 1993 | 5  | 5  | 4  | 34 0.710  | 1,4 44.27583 | 6.85650 | 12.210 | 324 | 78 | -171 D |
| 1993 | 5  | 7  | 8  | 4 12.430  | 1,8 44.34566 | 7.27817 | 10.280 | 88  | 52 | -169 D |
| 1993 | 5  | 8  | 20 | 50 29.610 | 1,7 44.56750 | 6.99300 | 12.520 | 190 | 69 | -122 D |
| 1993 | 6  | 1  | 1  | 8 1.620   | 1,3 44.41983 | 7.21983 | 11.060 | 144 | 80 | -111 D |
| 1993 | 6  | 15 | 15 | 0 21.260  | 1,6 44.52733 | 6.85233 | 9.590  | 30  | 50 | -96 D  |
| 1993 | 6  | 25 | 11 | 16 47.130 | 1,7 45.39650 | 6.49717 | 8.280  | 301 | 37 | -119 D |
| 1993 | 6  | 25 | 15 | 32 40.860 | 2 45.38550   | 6.50650 | 4.920  | 203 | 78 | -140 D |
| 1993 | 7  | 11 | 14 | 5 32.400  | 1,7 45.33100 | 6.68117 | 8.010  | 261 | 53 | -163 D |
| 1993 | 7  | 12 | 12 | 12 24.340 | 1,6 45.17567 | 5.42817 | 9.000  | 57  | 35 | -110 D |
| 1993 | 7  | 13 | 9  | 53 22.810 | 2,6 44.26833 | 8.19033 | 6.620  | 255 | 83 | -157 D |
| 1993 | 7  | 13 | 16 | 11 8.530  | 2,3 44.24233 | 8.19783 | 8.930  | 90  | 75 | -168 D |
| 1993 | 7  | 14 | 15 | 11 41.460 | 2,8 44.25333 | 8.20050 | 8.750  | 253 | 88 | -143 D |
| 1993 | 7  | 14 | 23 | 40 12.660 | 2,6 44.23317 | 8.22633 | 10.400 | 78  | 79 | 166 D  |
| 1993 | 7  | 15 | 3  | 8 34.330  | 2,1 44.24733 | 8.21733 | 10.350 | 289 | 42 | -157 D |
| 1993 | 7  | 17 | 5  | 46 4.400  | 3,4 44.24217 | 8.26517 | 10.400 | 71  | 74 | -176 D |
| 1993 | 7  | 17 | 10 | 35 0.190  | 3,7 44.22633 | 8.24783 | 11.680 | 67  | 85 | -142 D |
| 1993 | 7  | 17 | 11 | 8 22.780  | 3,1 44.24017 | 8.25717 | 12.380 | 78  | 78 | -177 D |
| 1993 | 7  | 21 | 1  | 59 16.410 | 2,4 45.48667 | 6.65150 | 7.440  | 147 | 68 | -104 D |
| 1993 | 7  | 26 | 4  | 57 47.130 | 2,8 44.34650 | 7.27683 | 9.980  | 79  | 83 | -166 D |
| 1993 | 7  | 26 | 20 | 31 7.020  | 2 45.64233   | 6.73633 | 9.600  | 219 | 37 | -141 D |
| 1993 | 7  | 31 | 19 | 50 9.320  | 1,5 45.05333 | 7.30967 | 14.730 | 32  | 88 | -159 D |
| 1993 | 8  | 5  | 4  | 20 46.350 | 1,2 45.83933 | 6.95250 | 10.020 | 18  | 87 | 172 D  |
| 1993 | 8  | 13 | 1  | 19 20.820 | 1,5 44.52050 | 6.76333 | 7.680  | 139 | 64 | -89 D  |
| 1993 | 8  | 30 | 8  | 19 34.600 | 1,9 44.36683 | 7.29417 | 14.370 | 22  | 41 | -88 D  |
| 1993 | 9  | 3  | 0  | 31 22.200 | 1,8 44.44250 | 7.25550 | 14.090 | 245 | 18 | -112 D |
| 1993 | 9  | 16 | 13 | 48 32.370 | 1,6 44.86417 | 7.18867 | 12.930 | 330 | 26 | -131 D |
| 1993 | 9  | 28 | 9  | 33 39.090 | 2,1 44.13017 | 7.40667 | 12.670 | 326 | 52 | -104 D |
| 1993 | 10 | 1  | 5  | 11 12.780 | 2,1 44.53467 | 7.26733 | 13.460 | 227 | 47 | -89 C  |
| 1993 | 10 | 9  | 17 | 37 20.650 | 1,9 44.34533 | 7.27717 | 10.150 | 35  | 66 | 121 D  |
| 1993 | 10 | 9  | 22 | 28 12.770 | 1,7 45.26233 | 6.53767 | 5.340  | 336 | 16 | -167 D |
| 1993 | 10 | 11 | 4  | 33 5.590  | 1,4 44.59283 | 6.33833 | 7.600  | 2   | 58 | -125 D |
| 1993 | 10 | 21 | 15 | 30 16.710 | 2 44.40583   | 6.88933 | 12.300 | 151 | 73 | -170 D |
| 1993 | 10 | 23 | 4  | 26 42.500 | 2,2 45.03550 | 7.28400 | 13.650 | 203 | 76 | -153 D |
| 1993 | 10 | 30 | 5  | 45 11.630 | 1,3 44.79750 | 6.63983 | 9.700  | 7   | 21 | -58 D  |
| 1993 | 11 | 2  | 21 | 34 28.950 | 1,7 44.69117 | 7.37050 | 17.160 | 273 | 86 | -123 D |
| 1993 | 11 | 6  | 7  | 24 35.470 | 2,2 46.01883 | 6.60483 | 2.760  | 331 | 90 | -141 D |
| 1993 | 11 | 10 | 19 | 13 16.730 | 1,5 44.75017 | 6.63883 | 10.360 | 149 | 45 | -89 D  |
| 1993 | 11 | 15 | 0  | 20 1.250  | 2,6 44.76900 | 7.85650 | 39.230 | 25  | 90 | 142 D  |

|      |    |    |    |    |        |     |          |         |        |     |    |        |
|------|----|----|----|----|--------|-----|----------|---------|--------|-----|----|--------|
| 1993 | 11 | 21 | 20 | 27 | 57.730 | 2,1 | 44.64233 | 6.77367 | 7.830  | 77  | 24 | -46 D  |
| 1993 | 11 | 22 | 3  | 28 | 54.320 | 1,8 | 45.59033 | 6.95317 | 9.560  | 211 | 71 | -128 D |
| 1993 | 11 | 29 | 14 | 15 | 2.150  | 2   | 44.63950 | 6.70750 | 8.480  | 117 | 5  | -39 D  |
| 1993 | 12 | 3  | 0  | 47 | 35.240 | 2,4 | 44.73783 | 6.75550 | 5.180  | 202 | 28 | 107 D  |
| 1993 | 12 | 4  | 8  | 36 | 1.580  | 2,6 | 46.27767 | 7.48367 | 7.890  | 89  | 90 | 152 D  |
| 1993 | 12 | 11 | 13 | 50 | 56.860 | 2,9 | 44.06233 | 7.67933 | 7.390  | 7   | 87 | 116 D  |
| 1993 | 12 | 14 | 3  | 7  | 6.820  | 2   | 45.04583 | 6.55067 | 7.640  | 161 | 72 | -135 C |
| 1993 | 12 | 24 | 8  | 32 | 42.090 | 2,7 | 43.67350 | 7.88633 | 12.770 | 132 | 80 | -151 D |
| 1993 | 12 | 25 | 10 | 52 | 36.490 | 2,4 | 44.26383 | 8.19917 | 9.030  | 264 | 62 | -143 D |
| 1993 | 12 | 25 | 22 | 50 | 38.060 | 2,4 | 44.23450 | 8.20983 | 11.010 | 334 | 28 | -109 D |
| 1993 | 12 | 27 | 19 | 58 | 17.590 | 1,9 | 44.34633 | 7.31550 | 16.160 | 248 | 67 | -84 D  |
| 1994 | 1  | 6  | 3  | 31 | 1.320  | 1,9 | 44.84067 | 7.58883 | 25.640 | 174 | 87 | 171 D  |
| 1994 | 1  | 9  | 5  | 28 | 12.080 | 1,8 | 44.51467 | 7.27633 | 15.760 | 337 | 78 | -147 D |
| 1994 | 1  | 20 | 6  | 59 | 13.170 | 3,6 | 44.56367 | 7.35283 | 2.860  | 62  | 85 | -171 C |
| 1994 | 1  | 20 | 7  | 5  | 42.300 | 3,4 | 44.56233 | 7.35100 | 6.080  | 63  | 85 | -170 D |
| 1994 | 1  | 20 | 11 | 28 | 59.890 | 2,4 | 44.54950 | 7.33533 | 7.930  | 235 | 78 | -170 C |
| 1994 | 1  | 20 | 11 | 38 | 35.610 | 2,1 | 44.55533 | 7.33217 | 9.140  | 22  | 83 | 133 D  |
| 1994 | 1  | 21 | 23 | 27 | 32.800 | 2,6 | 44.55517 | 7.34217 | 6.160  | 60  | 79 | 180 D  |
| 1994 | 1  | 22 | 1  | 29 | 41.680 | 1,6 | 44.55416 | 7.32483 | 9.690  | 52  | 84 | -141 D |
| 1994 | 1  | 23 | 9  | 10 | 46.530 | 1,7 | 44.55767 | 7.31200 | 9.760  | 258 | 72 | -169 D |
| 1994 | 1  | 24 | 3  | 43 | 48.570 | 1,8 | 44.55800 | 7.32300 | 9.650  | 210 | 80 | 114 D  |
| 1994 | 2  | 3  | 3  | 46 | 0.430  | 2,8 | 45.63700 | 5.71033 | 8.620  | 75  | 86 | -175 D |
| 1994 | 2  | 4  | 22 | 19 | 46.080 | 2,1 | 45.40450 | 6.07567 | 9.630  | 218 | 55 | -148 D |
| 1994 | 2  | 5  | 0  | 52 | 11.370 | 3,2 | 45.09417 | 7.38883 | 21.120 | 221 | 44 | -91 C  |
| 1994 | 2  | 8  | 11 | 17 | 34.770 | 1,7 | 44.97300 | 6.67400 | 11.120 | 218 | 62 | -87 D  |
| 1994 | 2  | 9  | 8  | 33 | 22.830 | 1,9 | 45.06367 | 7.33000 | 16.160 | 189 | 84 | -133 D |
| 1994 | 2  | 11 | 9  | 28 | 1.480  | 1,8 | 44.41233 | 6.86150 | 11.090 | 150 | 71 | 178 D  |
| 1994 | 2  | 11 | 11 | 35 | 22.140 | 1,5 | 44.37967 | 6.92583 | 9.290  | 3   | 34 | -110 D |
| 1994 | 3  | 2  | 16 | 50 | 10.690 | 1,9 | 44.12883 | 6.98600 | 5.220  | 319 | 46 | -123 D |
| 1994 | 3  | 5  | 8  | 12 | 1.530  | 1,4 | 44.46867 | 7.22833 | 16.160 | 123 | 56 | -100 D |
| 1994 | 3  | 15 | 8  | 6  | 26.070 | 2,1 | 44.02283 | 8.50583 | 16.300 | 134 | 77 | -125 D |
| 1994 | 3  | 19 | 22 | 11 | 13.070 | 1,4 | 45.98300 | 7.56100 | 8.310  | 198 | 86 | 146 D  |
| 1994 | 4  | 15 | 2  | 58 | 12.620 | 1,9 | 44.28350 | 6.75817 | 7.600  | 120 | 59 | -97 D  |
| 1994 | 4  | 18 | 11 | 36 | 13.650 | 2   | 44.67600 | 7.21967 | 11.240 | 11  | 47 | -107 D |
| 1994 | 4  | 18 | 11 | 49 | 18.360 | 1,6 | 44.66317 | 7.19067 | 13.380 | 339 | 61 | -98 D  |
| 1994 | 4  | 27 | 13 | 22 | 32.270 | 1,6 | 45.03650 | 6.26650 | 10.290 | 295 | 85 | 130 D  |
| 1994 | 4  | 29 | 0  | 20 | 28.640 | 2,1 | 45.53417 | 7.74567 | 10.570 | 55  | 64 | -152 D |
| 1994 | 4  | 29 | 22 | 33 | 25.340 | 1,3 | 44.67017 | 7.19683 | 12.840 | 38  | 38 | -111 D |
| 1994 | 5  | 17 | 2  | 59 | 0.290  | 1,4 | 45.04250 | 7.11433 | 11.440 | 347 | 79 | 137 D  |
| 1994 | 6  | 22 | 23 | 8  | 35.510 | 1,8 | 44.56083 | 6.92867 | 13.470 | 151 | 84 | -157 D |
| 1994 | 6  | 27 | 17 | 48 | 47.890 | 2,7 | 44.43700 | 6.46867 | 7.490  | 131 | 35 | -103 B |
| 1994 | 7  | 8  | 0  | 15 | 29.180 | 2,4 | 44.45550 | 7.29250 | 12.720 | 198 | 42 | -101 D |
| 1994 | 7  | 25 | 0  | 18 | 56.440 | 1,8 | 45.19350 | 5.89900 | 9.550  | 40  | 87 | -145 D |
| 1994 | 8  | 1  | 21 | 39 | 26.040 | 2,1 | 45.19883 | 6.32933 | 7.410  | 213 | 83 | -167 D |
| 1994 | 8  | 13 | 18 | 28 | 40.370 | 1,9 | 44.66900 | 7.21000 | 14.360 | 13  | 44 | -108 D |
| 1994 | 8  | 14 | 4  | 4  | 47.010 | 1,8 | 44.19683 | 6.96550 | 12.990 | 311 | 80 | -129 D |
| 1994 | 8  | 28 | 6  | 4  | 44.220 | 3,5 | 46.88600 | 8.78050 | 8.590  | 251 | 81 | 172 D  |
| 1994 | 9  | 1  | 6  | 2  | 27.830 | 2,1 | 45.40133 | 5.73967 | 4.050  | 295 | 86 | -147 D |
| 1994 | 9  | 3  | 15 | 56 | 48.580 | 1,6 | 45.01600 | 7.37883 | 17.330 | 31  | 63 | -93 D  |
| 1994 | 9  | 16 | 17 | 58 | 10.230 | 2,1 | 44.64917 | 6.87217 | 8.700  | 326 | 47 | -83 D  |
| 1994 | 9  | 17 | 11 | 46 | 59.430 | 1,5 | 45.03967 | 6.54950 | 11.050 | 302 | 54 | -137 D |
| 1994 | 9  | 22 | 8  | 47 | 13.480 | 1,8 | 44.44700 | 7.27633 | 16.030 | 17  | 82 | 176 D  |
| 1994 | 9  | 24 | 4  | 18 | 17.320 | 2,4 | 44.53400 | 6.87217 | 7.220  | 349 | 72 | -142 D |

|      |    |    |    |    |        |     |          |         |        |     |    |        |
|------|----|----|----|----|--------|-----|----------|---------|--------|-----|----|--------|
| 1994 | 9  | 28 | 12 | 43 | 34.750 | 1,7 | 44.24450 | 7.31283 | 12.380 | 9   | 54 | -92 D  |
| 1994 | 10 | 19 | 23 | 48 | 33.390 | 2   | 45.39483 | 5.74067 | 5.440  | 67  | 78 | -163 D |
| 1994 | 10 | 22 | 18 | 58 | 38.670 | 1,6 | 45.78283 | 5.87133 | 10.030 | 80  | 82 | 131 D  |
| 1994 | 11 | 11 | 14 | 32 | 50.470 | 1,8 | 44.43200 | 7.25733 | 15.350 | 133 | 54 | -157 D |
| 1994 | 11 | 13 | 0  | 36 | 4.560  | 1,4 | 44.33050 | 6.47617 | 9.910  | 171 | 87 | 140 D  |
| 1994 | 11 | 15 | 11 | 36 | 13.080 | 1,6 | 44.33083 | 7.29867 | 9.820  | 255 | 76 | -169 D |
| 1994 | 11 | 28 | 8  | 28 | 13.830 | 1,8 | 44.34383 | 6.66667 | 11.250 | 123 | 46 | 173 D  |
| 1994 | 12 | 2  | 10 | 5  | 51.530 | 1,4 | 45.00650 | 7.17967 | 15.160 | 14  | 74 | 169 D  |
| 1994 | 12 | 3  | 21 | 15 | 23.870 | 2,2 | 44.52767 | 6.87800 | 8.110  | 346 | 55 | -99 D  |
| 1994 | 12 | 7  | 21 | 45 | 36.630 | 1,8 | 44.53500 | 7.18133 | 15.550 | 11  | 38 | -97 D  |
| 1994 | 12 | 14 | 8  | 55 | 58.870 | 4   | 45.97133 | 6.42900 | 10.880 | 238 | 87 | 146 D  |
| 1994 | 12 | 22 | 15 | 45 | 30.830 | 1,5 | 45.88717 | 6.89283 | 9.390  | 37  | 81 | -178 D |
| 1995 | 1  | 4  | 0  | 47 | 2.690  | 3,2 | 44.88017 | 7.31383 | 16.030 | 26  | 60 | -127 B |
| 1995 | 2  | 26 | 12 | 35 | 38.910 | 1,7 | 44.20250 | 6.62017 | 7.290  | 332 | 85 | 156 D  |
| 1995 | 3  | 4  | 1  | 58 | 13.370 | 2,3 | 44.70850 | 7.65733 | 18.990 | 346 | 32 | 146 D  |
| 1995 | 4  | 14 | 16 | 13 | 37.460 | 2   | 44.56667 | 7.18200 | 11.330 | 115 | 82 | 128 D  |
| 1995 | 4  | 18 | 2  | 28 | 27.280 | 1,8 | 44.66084 | 6.68783 | 7.840  | 305 | 77 | 148 D  |
| 1995 | 4  | 21 | 8  | 2  | 56.750 | 4,2 | 43.81617 | 7.56767 | 12.260 | 286 | 44 | 162 B  |
| 1995 | 4  | 21 | 18 | 19 | 30.800 | 2,2 | 45.72583 | 7.05050 | 10.460 | 4   | 78 | 150 D  |
| 1995 | 4  | 24 | 0  | 39 | 39.440 | 1,8 | 44.66267 | 7.19083 | 14.120 | 9   | 54 | -102 D |
| 1995 | 4  | 25 | 13 | 2  | 57.480 | 2,1 | 45.85617 | 5.98667 | 6.470  | 221 | 72 | -171 D |
| 1995 | 5  | 26 | 12 | 45 | 13.970 | 1,5 | 46.06600 | 6.85317 | 10.560 | 78  | 73 | -171 D |
| 1995 | 6  | 20 | 4  | 38 | 16.840 | 1,8 | 44.40550 | 7.29517 | 15.510 | 204 | 51 | -97 D  |
| 1995 | 8  | 2  | 3  | 5  | 16.590 | 2   | 45.94683 | 6.08317 | 4.260  | 63  | 77 | -144 D |
| 1995 | 8  | 28 | 12 | 42 | 29.060 | 2,4 | 45.55617 | 6.13100 | 9.790  | 54  | 45 | 127 D  |
| 1995 | 9  | 4  | 17 | 2  | 53.940 | 2,8 | 45.71333 | 6.21050 | 8.300  | 239 | 88 | 155 D  |
| 1995 | 9  | 4  | 21 | 1  | 39.300 | 2,8 | 45.71250 | 6.20150 | 8.890  | 231 | 85 | 170 D  |
| 1995 | 9  | 5  | 17 | 29 | 47.190 | 1,3 | 45.80533 | 7.15867 | 11.290 | 178 | 88 | 142 D  |
| 1995 | 9  | 8  | 16 | 46 | 56.610 | 2,5 | 45.20917 | 5.90867 | 8.790  | 214 | 83 | 162 D  |
| 1995 | 9  | 11 | 22 | 55 | 52.730 | 1,8 | 44.68884 | 6.79333 | 7.460  | 278 | 68 | 166 D  |
| 1995 | 9  | 17 | 6  | 46 | 37.220 | 1,4 | 45.38567 | 6.21867 | 11.020 | 241 | 77 | 163 D  |
| 1995 | 9  | 20 | 8  | 23 | 22.810 | 3,1 | 43.44017 | 8.15150 | 22.080 | 85  | 37 | 135 D  |
| 1995 | 9  | 22 | 8  | 6  | 3.050  | 2   | 44.52750 | 6.90950 | 6.670  | 18  | 79 | 99 D   |
| 1995 | 10 | 7  | 19 | 15 | 1.120  | 2,1 | 44.38483 | 7.28633 | 12.950 | 9   | 45 | -102 D |
| 1995 | 10 | 7  | 22 | 12 | 26.740 | 2,1 | 44.38100 | 7.27483 | 14.830 | 345 | 49 | -144 D |
| 1995 | 10 | 8  | 6  | 7  | 46.340 | 2,2 | 44.51417 | 6.90450 | 7.080  | 146 | 80 | 160 D  |
| 1995 | 10 | 13 | 22 | 7  | 41.730 | 2,9 | 44.51400 | 6.86017 | 8.030  | 339 | 68 | -139 C |
| 1995 | 10 | 16 | 11 | 4  | 22.800 | 2,5 | 44.78550 | 6.77183 | 11.050 | 3   | 8  | -91 C  |
| 1995 | 10 | 18 | 2  | 13 | 8.890  | 2,2 | 44.51367 | 6.89533 | 7.910  | 127 | 52 | -120 D |
| 1995 | 10 | 18 | 8  | 47 | 15.310 | 1,5 | 44.51333 | 6.88733 | 7.740  | 315 | 69 | -88 D  |
| 1995 | 10 | 18 | 12 | 52 | 58.380 | 1,8 | 44.31900 | 7.35883 | 16.940 | 310 | 51 | -95 D  |
| 1995 | 10 | 18 | 13 | 49 | 47.930 | 1,8 | 44.51367 | 6.88967 | 7.770  | 111 | 40 | -92 D  |
| 1995 | 10 | 29 | 3  | 57 | 5.710  | 2,3 | 46.21850 | 7.21350 | 7.190  | 266 | 82 | 123 D  |
| 1995 | 11 | 9  | 16 | 20 | 50.430 | 1,9 | 45.82533 | 5.53633 | 5.420  | 251 | 43 | -161 D |
| 1995 | 11 | 10 | 22 | 4  | 12.880 | 2,7 | 44.48667 | 7.23800 | 11.630 | 154 | 48 | -116 D |
| 1995 | 11 | 17 | 0  | 48 | 43.820 | 1,8 | 44.51950 | 6.69367 | 10.030 | 58  | 27 | -84 D  |
| 1995 | 11 | 18 | 18 | 41 | 51.030 | 1,3 | 44.81800 | 7.14883 | 16.090 | 152 | 29 | -118 D |
| 1995 | 11 | 21 | 4  | 4  | 34.620 | 3,6 | 45.01750 | 7.57100 | 17.550 | 92  | 66 | 145 B  |
| 1995 | 11 | 22 | 11 | 12 | 52.190 | 2,1 | 45.04617 | 6.54350 | 8.090  | 132 | 87 | -160 D |
| 1995 | 11 | 24 | 5  | 50 | 16.060 | 1,7 | 44.38517 | 7.29533 | 15.910 | 140 | 52 | -153 D |
| 1995 | 11 | 25 | 6  | 27 | 38.670 | 1,6 | 44.51900 | 6.69067 | 10.660 | 18  | 40 | -101 D |
| 1995 | 12 | 22 | 7  | 46 | 54.730 | 1,5 | 44.77583 | 7.87717 | 37.580 | 244 | 64 | -149 D |
| 1995 | 12 | 24 | 4  | 5  | 5.930  | 1,8 | 45.49317 | 6.07367 | 10.770 | 250 | 47 | 124 D  |



|      |    |    |    |    |        |     |          |         |        |     |    |        |
|------|----|----|----|----|--------|-----|----------|---------|--------|-----|----|--------|
| 1995 | 12 | 29 | 2  | 20 | 52.200 | 1,2 | 44.51400 | 6.73500 | 10.180 | 213 | 26 | -138 D |
| 1996 | 1  | 1  | 21 | 3  | 32.890 | 2,4 | 44.41417 | 7.29433 | 12.500 | 51  | 63 | 165 D  |
| 1996 | 1  | 3  | 5  | 18 | 28.640 | 2   | 44.41317 | 7.29500 | 14.510 | 40  | 48 | -111 D |
| 1996 | 1  | 22 | 16 | 41 | 44.700 | 2   | 44.47050 | 6.77683 | 9.270  | 132 | 75 | -153 D |
| 1996 | 1  | 26 | 1  | 0  | 49.710 | 1,6 | 44.51467 | 7.25733 | 16.090 | 131 | 82 | -169 D |
| 1996 | 1  | 26 | 2  | 19 | 45.600 | 2   | 44.50933 | 7.25800 | 16.570 | 300 | 90 | -122 D |
| 1996 | 1  | 26 | 19 | 1  | 14.850 | 2   | 45.97650 | 6.45150 | 6.750  | 78  | 73 | 170 D  |
| 1996 | 2  | 18 | 4  | 16 | 32.650 | 3,3 | 44.75050 | 6.76983 | 9.540  | 338 | 16 | -137 B |
| 1996 | 2  | 21 | 18 | 57 | 27.360 | 2,6 | 46.36234 | 7.59417 | 8.470  | 256 | 49 | 178 D  |
| 1996 | 3  | 5  | 9  | 35 | 33.630 | 2   | 44.47383 | 7.29650 | 15.330 | 48  | 51 | -89 D  |
| 1996 | 3  | 23 | 21 | 29 | 28.750 | 1,7 | 45.22517 | 7.45317 | 15.880 | 246 | 64 | -107 D |
| 1996 | 3  | 31 | 5  | 43 | 7.480  | 1,2 | 45.40300 | 6.59533 | 12.080 | 230 | 55 | -113 D |
| 1996 | 4  | 2  | 10 | 37 | 0.700  | 1,9 | 46.16483 | 6.98783 | 6.660  | 258 | 84 | -141 D |
| 1996 | 4  | 4  | 23 | 55 | 23.080 | 1,8 | 45.24383 | 5.96333 | 9.900  | 209 | 82 | 158 D  |
| 1996 | 4  | 5  | 2  | 4  | 5.420  | 2   | 45.26467 | 5.96400 | 10.220 | 226 | 39 | -143 D |
| 1996 | 4  | 6  | 13 | 7  | 38.410 | 1,2 | 44.90367 | 6.56850 | 8.900  | 332 | 69 | 171 D  |
| 1996 | 4  | 12 | 6  | 44 | 49.990 | 1,8 | 44.56167 | 7.26333 | 15.450 | 198 | 48 | -94 D  |
| 1996 | 4  | 14 | 4  | 22 | 42.320 | 1,7 | 44.35217 | 7.26500 | 13.700 | 226 | 51 | -93 D  |
| 1996 | 4  | 18 | 5  | 31 | 40.430 | 2,8 | 44.26317 | 6.91033 | 10.120 | 328 | 82 | 161 D  |
| 1996 | 4  | 18 | 5  | 39 | 43.980 | 1,5 | 44.25700 | 6.90183 | 12.580 | 150 | 81 | -143 D |
| 1996 | 5  | 20 | 19 | 15 | 1.580  | 1,6 | 46.36000 | 7.59383 | 8.490  | 263 | 80 | -167 D |
| 1996 | 6  | 2  | 10 | 40 | 25.820 | 1,7 | 45.28233 | 6.29817 | 6.650  | 297 | 53 | -64 D  |
| 1996 | 6  | 10 | 9  | 2  | 55.300 | 1,8 | 44.53600 | 6.88117 | 8.270  | 178 | 58 | -105 D |
| 1996 | 6  | 23 | 4  | 46 | 9.390  | 1,8 | 46.82433 | 6.91450 | 7.810  | 309 | 18 | -12 D  |
| 1996 | 6  | 25 | 12 | 32 | 20.400 | 1,5 | 46.07400 | 6.86317 | 9.970  | 83  | 72 | -160 D |
| 1996 | 6  | 27 | 22 | 39 | 59.240 | 2,4 | 46.67567 | 7.22117 | 1.700  | 221 | 86 | 105 D  |
| 1996 | 7  | 15 | 0  | 13 | 29.350 | 4,5 | 45.94617 | 6.10400 | 1.810  | 234 | 66 | 161 D  |
| 1996 | 7  | 15 | 5  | 46 | 12.230 | 2,9 | 45.95367 | 6.10133 | 6.210  | 242 | 83 | 152 D  |
| 1996 | 7  | 15 | 6  | 44 | 9.800  | 2   | 45.94683 | 6.10300 | 3.360  | 220 | 76 | 176 D  |
| 1996 | 7  | 19 | 0  | 27 | 27.540 | 1,4 | 44.42667 | 7.45717 | 12.980 | 265 | 65 | 124 D  |
| 1996 | 7  | 20 | 22 | 4  | 33.450 | 2,6 | 45.95400 | 6.10050 | 3.900  | 227 | 78 | 136 D  |
| 1996 | 7  | 23 | 2  | 50 | 30.390 | 2,3 | 45.94083 | 6.11200 | 3.350  | 218 | 83 | 130 D  |
| 1996 | 7  | 23 | 4  | 8  | 40.080 | 3,3 | 45.95867 | 6.08267 | 0.130  | 229 | 85 | 147 D  |
| 1996 | 7  | 31 | 16 | 18 | 1.800  | 1,2 | 46.33000 | 7.54300 | 5.600  | 299 | 36 | -122 D |
| 1996 | 8  | 1  | 0  | 13 | 2.820  | 1,7 | 45.27950 | 6.29833 | 5.900  | 108 | 84 | -110 D |
| 1996 | 8  | 1  | 6  | 0  | 10.660 | 2,1 | 45.95450 | 6.09450 | 5.690  | 209 | 43 | -145 D |
| 1996 | 8  | 3  | 10 | 48 | 27.320 | 2,4 | 46.33417 | 7.53617 | 7.970  | 93  | 87 | 180 D  |
| 1996 | 8  | 9  | 17 | 31 | 15.950 | 1,7 | 44.41000 | 6.43750 | 7.730  | 229 | 41 | -78 D  |
| 1996 | 8  | 11 | 8  | 25 | 11.300 | 1,5 | 44.56883 | 7.18300 | 11.910 | 308 | 85 | -150 D |
| 1996 | 9  | 14 | 22 | 54 | 53.510 | 2,7 | 46.02050 | 6.78850 | 5.200  | 234 | 88 | 178 D  |
| 1996 | 9  | 17 | 0  | 25 | 42.740 | 1,8 | 46.02067 | 6.82317 | 4.580  | 45  | 54 | 160 D  |
| 1996 | 9  | 20 | 17 | 37 | 26.990 | 2,2 | 46.06367 | 6.85517 | 9.680  | 196 | 76 | 175 D  |
| 1996 | 9  | 26 | 11 | 5  | 39.800 | 1,5 | 44.88334 | 6.38233 | 8.640  | 184 | 74 | -141 D |
| 1996 | 9  | 27 | 16 | 50 | 47.450 | 1,1 | 45.11950 | 5.83417 | 8.140  | 53  | 37 | -148 D |
| 1996 | 9  | 30 | 18 | 16 | 59.720 | 1,7 | 44.87350 | 6.37167 | 8.610  | 341 | 64 | -133 D |
| 1996 | 10 | 7  | 2  | 13 | 24.550 | 2,3 | 44.22883 | 6.82633 | 6.670  | 179 | 87 | -165 D |
| 1996 | 10 | 9  | 3  | 2  | 57.140 | 1,9 | 45.96700 | 6.91333 | 9.870  | 239 | 81 | -162 D |
| 1996 | 10 | 11 | 4  | 36 | 6.720  | 2   | 45.93767 | 6.07150 | 7.860  | 203 | 74 | 140 D  |
| 1996 | 10 | 25 | 8  | 37 | 7.470  | 2   | 45.31467 | 6.53867 | 8.950  | 208 | 40 | -82 D  |
| 1996 | 11 | 5  | 3  | 32 | 20.050 | 1,3 | 45.26750 | 6.53817 | 9.820  | 230 | 60 | -107 D |
| 1996 | 11 | 10 | 18 | 26 | 10.130 | 2,1 | 46.41417 | 7.49967 | 7.660  | 71  | 85 | 159 D  |
| 1996 | 11 | 23 | 10 | 49 | 26.200 | 1,4 | 44.66350 | 7.19850 | 14.310 | 12  | 42 | -94 D  |
| 1996 | 11 | 24 | 0  | 27 | 7.610  | 2,9 | 44.05633 | 7.68067 | 8.110  | 265 | 89 | 176 D  |

|      |    |    |    |    |        |     |          |         |        |     |    |        |
|------|----|----|----|----|--------|-----|----------|---------|--------|-----|----|--------|
| 1996 | 12 | 7  | 5  | 34 | 28.010 | 2,4 | 46.90200 | 8.43517 | 7.560  | 67  | 64 | 159 D  |
| 1996 | 12 | 9  | 14 | 25 | 1.240  | 2,2 | 45.36350 | 5.33650 | 6.930  | 268 | 86 | -143 D |
| 1996 | 12 | 11 | 17 | 50 | 41.070 | 1,5 | 44.85400 | 7.26333 | 18.060 | 91  | 41 | -88 D  |
| 1996 | 12 | 25 | 12 | 39 | 24.740 | 2,5 | 46.21817 | 7.21417 | 8.010  | 259 | 80 | 162 D  |
| 1996 | 12 | 26 | 19 | 33 | 49.080 | 2,5 | 44.36700 | 7.33150 | 14.800 | 142 | 76 | 123 C  |
| 1997 | 1  | 26 | 11 | 31 | 59.790 | 1,5 | 44.04183 | 7.68017 | 8.870  | 229 | 70 | -119 D |
| 1997 | 1  | 31 | 12 | 48 | 31.010 | 1,5 | 45.20033 | 5.93833 | 9.920  | 47  | 83 | -148 D |
| 1997 | 2  | 19 | 5  | 12 | 53.350 | 1,6 | 45.29800 | 6.56650 | 11.630 | 297 | 54 | -93 D  |
| 1997 | 2  | 21 | 19 | 51 | 32.380 | 1,8 | 44.81033 | 6.64017 | 10.320 | 172 | 77 | -121 D |
| 1997 | 2  | 21 | 20 | 1  | 44.700 | 1,9 | 44.81700 | 6.65633 | 9.730  | 191 | 71 | -101 D |
| 1997 | 2  | 24 | 12 | 6  | 17.920 | 3,8 | 43.75683 | 8.45583 | 23.550 | 77  | 86 | 176 D  |
| 1997 | 3  | 1  | 11 | 23 | 19.520 | 1,7 | 44.43217 | 7.00217 | 12.200 | 271 | 88 | -169 D |
| 1997 | 3  | 2  | 16 | 24 | 49.850 | 2,2 | 44.80533 | 7.56100 | 28.710 | 261 | 53 | 117 D  |
| 1997 | 3  | 5  | 16 | 37 | 14.090 | 1,4 | 45.95284 | 6.10250 | 6.890  | 194 | 89 | -143 D |
| 1997 | 3  | 9  | 19 | 7  | 7.600  | 1,7 | 44.37067 | 7.33317 | 14.460 | 54  | 46 | -101 D |
| 1997 | 3  | 13 | 7  | 8  | 51.060 | 2,2 | 45.04917 | 6.92350 | 10.890 | 157 | 90 | -174 D |
| 1997 | 3  | 18 | 13 | 30 | 32.920 | 2,1 | 44.66867 | 7.21867 | 12.150 | 223 | 35 | -76 D  |
| 1997 | 3  | 18 | 16 | 42 | 7.950  | 1,8 | 46.20433 | 7.53600 | 5.360  | 127 | 48 | -98 D  |
| 1997 | 3  | 23 | 2  | 24 | 27.870 | 1,3 | 44.78367 | 6.91333 | 14.250 | 318 | 51 | -113 D |
| 1997 | 4  | 14 | 6  | 35 | 24.110 | 1,8 | 44.77234 | 7.24783 | 14.450 | 208 | 60 | -173 D |
| 1997 | 4  | 19 | 16 | 23 | 37.890 | 1,7 | 44.55017 | 7.25717 | 15.740 | 138 | 61 | -129 D |
| 1997 | 4  | 25 | 10 | 14 | 44.770 | 2   | 44.68950 | 7.25567 | 16.600 | 169 | 78 | -169 D |
| 1997 | 4  | 26 | 8  | 24 | 11.810 | 2,1 | 46.21867 | 7.73183 | 8.770  | 42  | 58 | -107 D |
| 1997 | 4  | 27 | 17 | 1  | 13.090 | 2,5 | 46.21917 | 7.73000 | 7.880  | 282 | 76 | -78 D  |
| 1997 | 5  | 13 | 8  | 18 | 20.950 | 1,6 | 44.55367 | 7.25917 | 15.670 | 200 | 39 | -85 D  |
| 1997 | 5  | 13 | 9  | 23 | 1.860  | 1,8 | 45.03633 | 7.33383 | 18.290 | 159 | 34 | -99 D  |
| 1997 | 5  | 14 | 17 | 23 | 0.610  | 2   | 44.48217 | 7.08817 | 10.770 | 296 | 35 | -163 D |
| 1997 | 5  | 15 | 0  | 24 | 3.260  | 3   | 45.21517 | 6.69300 | 6.890  | 305 | 88 | 165 D  |
| 1997 | 5  | 30 | 3  | 43 | 9.820  | 1,4 | 44.81450 | 6.63917 | 10.180 | 301 | 82 | 172 D  |
| 1997 | 6  | 16 | 12 | 47 | 59.010 | 1,6 | 45.17567 | 7.85750 | 36.680 | 307 | 63 | 94 D   |
| 1997 | 6  | 20 | 18 | 48 | 38.650 | 1,9 | 44.55350 | 7.16433 | 15.400 | 112 | 65 | -127 D |
| 1997 | 6  | 26 | 14 | 51 | 13.970 | 2   | 44.77150 | 7.64517 | 21.360 | 120 | 51 | 93 D   |
| 1997 | 6  | 27 | 19 | 0  | 34.620 | 2,1 | 45.76467 | 7.45983 | 6.510  | 245 | 47 | -112 D |
| 1997 | 7  | 2  | 17 | 39 | 16.670 | 1,9 | 44.22367 | 7.56833 | 10.510 | 215 | 76 | -119 D |
| 1997 | 7  | 3  | 4  | 34 | 50.110 | 1,6 | 45.56317 | 6.13617 | 10.510 | 54  | 47 | 128 D  |
| 1997 | 7  | 14 | 2  | 57 | 55.770 | 2,2 | 45.83150 | 7.14533 | 9.610  | 186 | 85 | 180 D  |
| 1997 | 7  | 19 | 1  | 25 | 42.070 | 2   | 45.02467 | 6.54933 | 9.700  | 317 | 84 | 173 D  |
| 1997 | 8  | 1  | 20 | 58 | 35.130 | 2,4 | 46.53617 | 7.26367 | 7.980  | 107 | 74 | -104 D |
| 1997 | 8  | 3  | 10 | 26 | 24.980 | 1,8 | 44.90417 | 6.62800 | 8.160  | 332 | 88 | 163 D  |
| 1997 | 8  | 16 | 11 | 20 | 14.270 | 2,4 | 43.93417 | 7.71583 | 8.550  | 123 | 86 | -143 D |
| 1997 | 8  | 19 | 19 | 47 | 58.250 | 1,4 | 45.00733 | 6.80650 | 11.280 | 331 | 72 | -135 D |
| 1997 | 8  | 30 | 6  | 56 | 35.920 | 2,2 | 44.72983 | 6.67667 | 8.550  | 339 | 31 | -131 D |
| 1997 | 9  | 3  | 14 | 49 | 49.540 | 1,7 | 45.38183 | 6.52567 | 9.010  | 71  | 70 | 150 D  |
| 1997 | 9  | 13 | 17 | 59 | 38.380 | 2,5 | 44.75067 | 6.78450 | 8.730  | 302 | 38 | -160 A |
| 1997 | 9  | 23 | 16 | 32 | 47.870 | 2,2 | 45.04450 | 5.73717 | 7.080  | 32  | 83 | 157 D  |
| 1997 | 9  | 26 | 12 | 23 | 14.450 | 2   | 43.89383 | 7.75200 | 7.840  | 282 | 87 | -172 D |
| 1997 | 10 | 3  | 15 | 3  | 34.680 | 3,2 | 44.32917 | 6.50417 | 10.310 | 141 | 89 | -167 D |
| 1997 | 10 | 22 | 4  | 42 | 32.120 | 2,3 | 44.41167 | 6.54250 | 9.660  | 352 | 41 | -133 D |
| 1997 | 10 | 22 | 4  | 51 | 8.250  | 2,2 | 44.40967 | 6.53200 | 7.790  | 353 | 43 | -152 B |
| 1997 | 10 | 31 | 4  | 23 | 42.140 | 4   | 44.26850 | 6.55400 | 7.460  | 94  | 33 | 108 D  |
| 1997 | 10 | 31 | 5  | 31 | 9.050  | 1,5 | 44.27400 | 6.55317 | 8.070  | 67  | 73 | 122 D  |
| 1997 | 10 | 31 | 7  | 13 | 44.700 | 1,6 | 44.26917 | 6.54350 | 7.870  | 19  | 57 | -139 D |
| 1997 | 10 | 31 | 7  | 15 | 19.220 | 2,8 | 44.28700 | 6.56233 | 8.080  | 336 | 68 | -146 C |

|      |    |    |    |    |        |     |          |         |        |     |    |        |
|------|----|----|----|----|--------|-----|----------|---------|--------|-----|----|--------|
| 1997 | 11 | 6  | 12 | 39 | 47.660 | 3,1 | 44.41233 | 6.54033 | 8.220  | 179 | 57 | 160 D  |
| 1997 | 11 | 8  | 1  | 56 | 6.500  | 3,5 | 44.12400 | 7.92383 | 7.320  | 88  | 83 | -158 D |
| 1997 | 11 | 25 | 23 | 55 | 16.060 | 2   | 44.42167 | 6.53867 | 11.430 | 344 | 59 | -113 D |
| 1997 | 11 | 28 | 8  | 30 | 19.850 | 2,6 | 46.44050 | 7.89650 | 12.620 | 258 | 68 | -156 D |
| 1997 | 12 | 8  | 18 | 22 | 0.190  | 1   | 45.28383 | 5.99200 | 11.800 | 64  | 81 | -132 D |
| 1997 | 12 | 10 | 21 | 36 | 57.490 | 2,4 | 43.82700 | 7.58583 | 12.780 | 321 | 82 | 161 D  |
| 1997 | 12 | 18 | 13 | 9  | 35.340 | 1,9 | 44.27700 | 6.55150 | 7.360  | 24  | 30 | -142 D |
| 1997 | 12 | 30 | 9  | 3  | 10.200 | 1,8 | 44.27483 | 6.57200 | 8.430  | 26  | 83 | 155 D  |
| 1998 | 1  | 8  | 22 | 49 | 29.030 | 2,1 | 44.49434 | 7.29817 | 16.190 | 176 | 50 | -97 D  |
| 1998 | 1  | 10 | 21 | 22 | 9.060  | 2,8 | 44.86567 | 7.47583 | 14.280 | 107 | 74 | -134 B |
| 1998 | 1  | 14 | 0  | 19 | 47.250 | 1,4 | 45.80783 | 7.16033 | 13.830 | 355 | 82 | 174 D  |
| 1998 | 1  | 20 | 16 | 1  | 51.740 | 2   | 44.39333 | 7.24550 | 15.500 | 227 | 36 | -110 D |
| 1998 | 2  | 3  | 23 | 38 | 38.780 | 3,1 | 43.73700 | 8.48517 | 25.330 | 233 | 80 | 155 D  |
| 1998 | 2  | 11 | 23 | 46 | 24.050 | 1,6 | 44.21750 | 7.55883 | 9.150  | 28  | 50 | -150 D |
| 1998 | 2  | 27 | 10 | 34 | 0.690  | 2   | 43.90000 | 7.75533 | 7.020  | 279 | 78 | 163 D  |
| 1998 | 3  | 3  | 13 | 52 | 34.670 | 2,3 | 45.76883 | 5.90883 | 10.910 | 249 | 80 | 165 D  |
| 1998 | 3  | 7  | 9  | 26 | 42.190 | 2,1 | 45.18067 | 6.52167 | 9.520  | 174 | 48 | -92 B  |
| 1998 | 3  | 20 | 12 | 9  | 46.490 | 2,6 | 44.71483 | 6.61050 | 7.460  | 348 | 28 | -135 D |
| 1998 | 3  | 30 | 20 | 48 | 59.000 | 2,5 | 46.58517 | 7.31150 | 10.420 | 257 | 44 | 145 D  |
| 1998 | 4  | 11 | 11 | 5  | 0.740  | 3,3 | 44.67267 | 7.22650 | 11.460 | 184 | 57 | -107 C |
| 1998 | 4  | 16 | 14 | 48 | 37.590 | 1,4 | 44.13583 | 7.14617 | 12.700 | 116 | 78 | -156 D |
| 1998 | 4  | 22 | 12 | 48 | 19.190 | 1,7 | 44.62267 | 7.24933 | 15.900 | 20  | 39 | -87 D  |
| 1998 | 5  | 1  | 23 | 45 | 13.210 | 1,7 | 44.33217 | 7.22933 | 10.680 | 108 | 88 | -132 D |
| 1998 | 5  | 6  | 12 | 2  | 24.510 | 2,6 | 44.19033 | 6.14367 | -0.510 | 177 | 89 | -159 D |
| 1998 | 5  | 11 | 9  | 1  | 9.390  | 2,1 | 44.77583 | 6.66817 | 8.310  | 342 | 35 | 144 D  |
| 1998 | 5  | 13 | 21 | 4  | 37.660 | 2,2 | 44.43600 | 6.35933 | 10.310 | 148 | 86 | 164 D  |
| 1998 | 5  | 13 | 21 | 11 | 53.980 | 2,3 | 44.42967 | 6.34017 | 9.750  | 315 | 85 | -157 D |
| 1998 | 5  | 21 | 5  | 15 | 50.970 | 1,2 | 44.51183 | 6.98333 | 10.530 | 314 | 87 | -155 D |
| 1998 | 6  | 6  | 1  | 23 | 13.350 | 2,4 | 44.54083 | 8.60233 | 11.320 | 181 | 76 | -87 D  |
| 1998 | 6  | 6  | 11 | 21 | 4.160  | 1,6 | 44.30933 | 6.49633 | 9.530  | 301 | 62 | -89 D  |
| 1998 | 6  | 13 | 22 | 20 | 48.560 | 2,4 | 44.27617 | 6.57150 | 6.770  | 120 | 59 | 126 D  |
| 1998 | 7  | 30 | 18 | 35 | 0.030  | 2,2 | 45.03217 | 6.69483 | 9.250  | 159 | 82 | -131 D |
| 1998 | 8  | 8  | 21 | 41 | 28.370 | 1,9 | 44.48017 | 6.91867 | 10.430 | 163 | 76 | -149 D |
| 1998 | 8  | 12 | 16 | 53 | 45.750 | 2   | 44.42417 | 6.68217 | 10.190 | 334 | 83 | 178 D  |
| 1998 | 8  | 15 | 11 | 54 | 32.080 | 1,2 | 44.95383 | 6.65467 | 9.570  | 203 | 88 | -137 D |
| 1998 | 8  | 28 | 20 | 51 | 19.830 | 2,1 | 44.55416 | 6.82217 | 8.810  | 300 | 90 | 153 D  |
| 1998 | 9  | 11 | 11 | 28 | 48.120 | 1,3 | 44.67017 | 7.19133 | 13.630 | 171 | 72 | -128 D |
| 1998 | 9  | 19 | 1  | 47 | 4.220  | 1,3 | 45.55633 | 6.13567 | 13.460 | 259 | 53 | 133 D  |
| 1998 | 9  | 20 | 19 | 42 | 27.740 | 1,4 | 44.59566 | 6.77583 | 10.140 | 292 | 83 | 162 D  |
| 1998 | 9  | 30 | 10 | 4  | 6.120  | 1,8 | 44.13633 | 7.14567 | 13.660 | 132 | 84 | -156 D |
| 1998 | 9  | 30 | 11 | 10 | 18.650 | 1,9 | 44.15117 | 7.15483 | 12.080 | 299 | 47 | -140 D |
| 1998 | 9  | 30 | 14 | 5  | 48.060 | 2   | 44.12950 | 7.14667 | 14.050 | 123 | 73 | -173 D |
| 1998 | 10 | 14 | 3  | 51 | 50.030 | 2,2 | 44.56100 | 7.25750 | 15.140 | 174 | 38 | -124 D |
| 1998 | 10 | 27 | 3  | 25 | 19.760 | 1,5 | 44.13517 | 7.14600 | 12.710 | 143 | 79 | -121 D |
| 1998 | 10 | 27 | 13 | 25 | 24.180 | 1,9 | 44.13683 | 7.14567 | 12.610 | 286 | 83 | 147 D  |
| 1998 | 10 | 27 | 18 | 34 | 12.670 | 1,8 | 44.41467 | 7.29167 | 15.480 | 119 | 53 | -128 D |
| 1998 | 10 | 31 | 19 | 57 | 20.360 | 1,8 | 45.28267 | 6.81467 | 8.260  | 47  | 88 | -130 D |
| 1998 | 11 | 24 | 11 | 46 | 2.690  | 1,7 | 45.01500 | 7.31283 | 18.810 | 330 | 71 | -109 D |
| 1998 | 11 | 25 | 16 | 4  | 34.650 | 1,9 | 46.31083 | 7.47350 | 5.470  | 269 | 34 | -150 D |
| 1998 | 11 | 27 | 2  | 57 | 45.250 | 1,2 | 44.48050 | 7.23833 | 10.510 | 103 | 33 | 128 D  |
| 1998 | 12 | 4  | 15 | 26 | 37.240 | 1,6 | 44.68417 | 7.34367 | 16.510 | 80  | 47 | -138 D |
| 1998 | 12 | 7  | 13 | 46 | 25.670 | 2,7 | 46.20333 | 7.54400 | 7.290  | 197 | 42 | -93 D  |
| 1998 | 12 | 7  | 15 | 14 | 45.560 | 1,8 | 46.19700 | 7.57250 | 5.680  | 130 | 59 | -85 D  |

|      |    |    |    |    |        |     |          |         |        |     |    |        |
|------|----|----|----|----|--------|-----|----------|---------|--------|-----|----|--------|
| 1998 | 12 | 9  | 8  | 56 | 2.590  | 2,2 | 46.00317 | 6.62317 | 3.050  | 214 | 52 | -113 D |
| 1998 | 12 | 9  | 22 | 8  | 14.010 | 2,8 | 46.19617 | 7.58217 | 3.650  | 69  | 38 | -96 D  |
| 1999 | 1  | 3  | 12 | 29 | 37.990 | 1,7 | 44.98734 | 6.78917 | 12.650 | 267 | 87 | -170 D |
| 1999 | 1  | 10 | 13 | 19 | 20.210 | 1,6 | 45.94550 | 6.94317 | 8.800  | 235 | 53 | -136 D |
| 1999 | 1  | 11 | 3  | 36 | 36.090 | 3,5 | 45.03733 | 5.77900 | 7.180  | 29  | 89 | -143 D |
| 1999 | 1  | 21 | 4  | 30 | 46.740 | 1,5 | 45.03067 | 5.77933 | 6.510  | 244 | 73 | -136 D |
| 1999 | 1  | 23 | 20 | 2  | 41.690 | 1,5 | 45.03083 | 5.78200 | 6.650  | 202 | 80 | 144 D  |
| 1999 | 1  | 26 | 23 | 31 | 41.070 | 1,7 | 45.03100 | 5.78200 | 6.610  | 208 | 88 | 173 D  |
| 1999 | 1  | 27 | 0  | 16 | 21.810 | 1,8 | 45.03033 | 5.77817 | 7.060  | 240 | 73 | -164 D |
| 1999 | 1  | 30 | 4  | 48 | 36.160 | 1,3 | 44.30483 | 7.35183 | 15.960 | 301 | 26 | 168 D  |
| 1999 | 2  | 3  | 16 | 20 | 24.380 | 2,4 | 45.03767 | 5.78683 | 4.050  | 219 | 65 | 134 B  |
| 1999 | 2  | 4  | 3  | 52 | 9.570  | 2   | 45.67583 | 7.08800 | 11.730 | 187 | 89 | 171 D  |
| 1999 | 2  | 7  | 20 | 7  | 39.840 | 1,4 | 44.83183 | 6.75100 | 8.800  | 176 | 88 | -174 D |
| 1999 | 2  | 8  | 21 | 5  | 23.960 | 1,8 | 43.92017 | 7.77550 | 7.470  | 101 | 72 | 147 D  |
| 1999 | 2  | 21 | 13 | 40 | 42.210 | 1,5 | 44.49300 | 6.88867 | 11.690 | 352 | 87 | 174 D  |
| 1999 | 2  | 25 | 14 | 39 | 9.080  | 2,4 | 44.76917 | 6.61917 | 7.270  | 197 | 46 | -114 D |
| 1999 | 2  | 26 | 9  | 50 | 41.210 | 1,4 | 44.48000 | 6.88017 | 12.250 | 171 | 90 | -157 D |
| 1999 | 2  | 28 | 9  | 40 | 12.450 | 1,7 | 44.87300 | 6.33733 | 8.620  | 298 | 63 | -164 D |
| 1999 | 4  | 4  | 20 | 18 | 35.450 | 1,6 | 44.44683 | 7.10717 | 10.240 | 307 | 86 | -149 D |
| 1999 | 4  | 10 | 0  | 4  | 30.370 | 1,8 | 44.85117 | 6.73083 | 11.260 | 153 | 58 | -86 D  |
| 1999 | 4  | 11 | 15 | 8  | 37.220 | 1,6 | 44.42133 | 7.37967 | 11.760 | 30  | 61 | 175 D  |
| 1999 | 4  | 13 | 7  | 48 | 35.330 | 2,1 | 45.19733 | 5.36383 | 6.220  | 218 | 88 | 109 D  |
| 1999 | 4  | 18 | 15 | 4  | 23.060 | 2,5 | 44.91600 | 7.26583 | 13.780 | 213 | 49 | -114 D |
| 1999 | 4  | 21 | 22 | 0  | 8.340  | 1,7 | 46.22983 | 7.63333 | 7.980  | 279 | 38 | -93 D  |
| 1999 | 4  | 23 | 6  | 25 | 58.490 | 1,7 | 45.03683 | 5.76767 | 6.230  | 267 | 76 | -132 D |
| 1999 | 4  | 23 | 18 | 57 | 8.680  | 1,7 | 44.59566 | 6.78267 | 8.860  | 182 | 85 | -166 D |
| 1999 | 4  | 30 | 20 | 59 | 8.320  | 2,9 | 44.06717 | 8.08233 | 9.300  | 85  | 89 | -151 D |
| 1999 | 5  | 1  | 11 | 45 | 44.990 | 1,6 | 45.33133 | 6.57150 | 11.130 | 313 | 42 | 131 D  |
| 1999 | 5  | 3  | 13 | 7  | 50.420 | 2   | 45.40900 | 5.74050 | 4.900  | 70  | 81 | -168 D |
| 1999 | 5  | 5  | 1  | 37 | 56.750 | 2,1 | 45.03700 | 5.77233 | 6.660  | 247 | 79 | 177 D  |
| 1999 | 5  | 6  | 17 | 50 | 24.090 | 1,9 | 44.78967 | 6.77050 | 10.330 | 286 | 77 | -98 D  |
| 1999 | 5  | 6  | 23 | 0  | 39.160 | 1,8 | 46.35917 | 7.59200 | 8.630  | 254 | 85 | 179 D  |
| 1999 | 5  | 19 | 3  | 50 | 11.980 | 1,9 | 44.49150 | 6.97600 | 11.670 | 145 | 83 | 167 D  |
| 1999 | 5  | 20 | 17 | 56 | 40.930 | 2,6 | 46.64183 | 7.33117 | 8.810  | 73  | 44 | -142 D |
| 1999 | 6  | 7  | 18 | 21 | 9.660  | 2,1 | 44.66433 | 7.21067 | 14.250 | 19  | 45 | -97 D  |
| 1999 | 6  | 9  | 3  | 28 | 14.610 | 1,6 | 45.41883 | 6.63100 | 8.920  | 255 | 53 | -125 D |
| 1999 | 6  | 10 | 16 | 16 | 10.520 | 2,4 | 45.57400 | 6.15767 | 12.840 | 80  | 83 | 151 D  |
| 1999 | 7  | 14 | 21 | 22 | 16.780 | 1,9 | 45.33867 | 6.66167 | 7.230  | 129 | 78 | 150 D  |
| 1999 | 8  | 12 | 0  | 32 | 41.670 | 2   | 45.22567 | 7.45300 | 13.720 | 93  | 70 | -88 D  |
| 1999 | 8  | 14 | 15 | 50 | 53.140 | 1,8 | 44.58900 | 7.23817 | 12.760 | 355 | 76 | -106 D |
| 1999 | 8  | 15 | 2  | 50 | 6.640  | 1,4 | 44.68333 | 7.00317 | 11.220 | 168 | 79 | -167 D |
| 1999 | 8  | 15 | 21 | 46 | 42.500 | 1,7 | 46.08383 | 6.85650 | 10.650 | 264 | 88 | -169 D |
| 1999 | 8  | 16 | 14 | 43 | 59.150 | 1,7 | 44.66250 | 7.18283 | 14.930 | 196 | 26 | -45 D  |
| 1999 | 8  | 17 | 16 | 1  | 14.670 | 1,6 | 43.87817 | 7.70817 | 10.670 | 273 | 88 | 157 D  |
| 1999 | 8  | 17 | 16 | 24 | 8.730  | 1,2 | 44.91300 | 6.74317 | 9.730  | 312 | 68 | -170 D |
| 1999 | 8  | 28 | 15 | 3  | 13.090 | 2,9 | 45.24883 | 6.55817 | 11.050 | 34  | 49 | -97 A  |
| 1999 | 9  | 8  | 12 | 32 | 47.410 | 2   | 44.66967 | 7.20200 | 14.360 | 70  | 44 | -76 D  |
| 1999 | 9  | 13 | 23 | 27 | 10.340 | 3,1 | 45.46417 | 5.45650 | 7.500  | 68  | 80 | 175 D  |
| 1999 | 10 | 25 | 15 | 41 | 57.730 | 2   | 45.05416 | 7.49450 | 25.940 | 342 | 78 | 128 D  |
| 1999 | 11 | 5  | 14 | 30 | 31.200 | 1,9 | 46.20967 | 7.65083 | 6.400  | 160 | 46 | -92 D  |
| 1999 | 11 | 16 | 5  | 4  | 7.960  | 2   | 45.66250 | 5.11500 | 10.250 | 79  | 86 | 174 D  |
| 1999 | 11 | 20 | 2  | 59 | 34.460 | 1,3 | 44.45550 | 7.26667 | 16.840 | 344 | 82 | -166 D |
| 1999 | 11 | 30 | 19 | 25 | 1.890  | 2,4 | 44.50717 | 7.29317 | 13.110 | 183 | 74 | 135 D  |

|      |    |    |    |    |        |     |          |          |        |     |    |        |
|------|----|----|----|----|--------|-----|----------|----------|--------|-----|----|--------|
| 1999 | 12 | 24 | 5  | 57 | 26.910 | 1,9 | 46.32567 | 7.42733  | 8.170  | 91  | 70 | -146 D |
| 1999 | 12 | 29 | 20 | 42 | 35.980 | 4,5 | 46.58317 | 10.08733 | -1.940 | 241 | 30 | 161 D  |
| 2000 | 1  | 10 | 5  | 30 | 9.000  | 2,6 | 46.16933 | 7.36783  | 7.220  | 48  | 90 | 167 D  |
| 2000 | 1  | 14 | 20 | 44 | 10.810 | 1,5 | 44.64667 | 7.77400  | 57.910 | 102 | 87 | 117 D  |
| 2000 | 1  | 22 | 23 | 34 | 42.480 | 2   | 44.35966 | 7.35200  | 11.030 | 354 | 37 | -141 D |
| 2000 | 1  | 28 | 1  | 38 | 5.000  | 1,7 | 44.61650 | 6.72950  | 8.970  | 63  | 41 | -96 D  |
| 2000 | 2  | 11 | 14 | 18 | 14.020 | 2,1 | 44.42533 | 7.27850  | 14.820 | 36  | 56 | -103 C |
| 2000 | 2  | 26 | 8  | 39 | 5.730  | 1,6 | 45.89350 | 6.73133  | 8.540  | 278 | 20 | -121 D |
| 2000 | 2  | 28 | 11 | 54 | 30.300 | 1,2 | 44.52117 | 6.95450  | 12.390 | 231 | 61 | -102 D |
| 2000 | 3  | 26 | 5  | 13 | 29.750 | 2,4 | 46.31950 | 7.39150  | 6.550  | 300 | 66 | -92 D  |
| 2000 | 4  | 1  | 1  | 21 | 37.080 | 2,6 | 45.09583 | 7.37000  | 10.700 | 209 | 82 | 168 D  |
| 2000 | 4  | 5  | 8  | 38 | 21.980 | 2,4 | 45.49267 | 4.88067  | 11.080 | 265 | 81 | 166 D  |
| 2000 | 4  | 6  | 17 | 40 | 38.680 | 4,1 | 46.58167 | 10.08650 | -1.960 | 300 | 24 | -139 D |
| 2000 | 4  | 8  | 4  | 18 | 36.250 | 2   | 45.84967 | 5.99683  | 7.220  | 219 | 88 | 138 D  |
| 2000 | 4  | 17 | 13 | 24 | 46.990 | 1,7 | 45.84533 | 5.99683  | 6.890  | 59  | 77 | 142 D  |
| 2000 | 5  | 31 | 7  | 46 | 6.100  | 2,9 | 44.80633 | 7.20050  | 15.010 | 27  | 45 | -89 B  |
| 2000 | 6  | 1  | 2  | 31 | 8.510  | 1,6 | 45.50817 | 6.67617  | 15.530 | 44  | 72 | 155 D  |
| 2000 | 6  | 1  | 2  | 41 | 33.960 | 2   | 45.50650 | 6.65983  | 11.920 | 350 | 11 | -91 D  |
| 2000 | 6  | 6  | 0  | 38 | 16.580 | 2,2 | 45.20233 | 7.09117  | 11.950 | 169 | 68 | -107 D |
| 2000 | 6  | 10 | 2  | 44 | 29.720 | 2,9 | 44.51433 | 7.33233  | 9.600  | 154 | 45 | 106 C  |
| 2000 | 6  | 15 | 7  | 7  | 34.020 | 1,7 | 44.39867 | 7.12550  | 8.120  | 92  | 88 | 152 D  |
| 2000 | 6  | 26 | 19 | 29 | 15.910 | 3   | 44.49467 | 6.89750  | 8.700  | 132 | 79 | 177 C  |
| 2000 | 7  | 31 | 22 | 57 | 36.010 | 1   | 44.34417 | 6.65433  | 12.120 | 125 | 88 | -142 D |
| 2000 | 8  | 13 | 4  | 2  | 55.800 | 2,2 | 44.82000 | 7.19767  | 12.130 | 41  | 43 | -74 B  |
| 2000 | 8  | 17 | 7  | 14 | 7.220  | 2,7 | 46.95817 | 8.48567  | 10.540 | 264 | 57 | 161 D  |
| 2000 | 8  | 17 | 13 | 53 | 51.620 | 1,6 | 44.48050 | 7.24967  | 14.820 | 153 | 71 | -151 D |
| 2000 | 8  | 17 | 17 | 30 | 18.900 | 2,4 | 45.03833 | 5.77967  | 5.860  | 68  | 54 | -160 D |
| 2000 | 8  | 19 | 8  | 37 | 24.190 | 3,2 | 46.03217 | 6.65200  | 4.620  | 260 | 82 | -157 D |
| 2000 | 8  | 19 | 8  | 54 | 15.130 | 2   | 46.03367 | 6.68133  | 8.780  | 108 | 63 | -113 D |
| 2000 | 8  | 21 | 17 | 14 | 27.780 | 4,8 | 44.80200 | 8.41483  | 7.260  | 231 | 89 | 133 D  |
| 2000 | 8  | 26 | 7  | 0  | 9.730  | 2,1 | 46.03817 | 6.68083  | 9.050  | 107 | 74 | -130 D |
| 2000 | 9  | 3  | 16 | 2  | 15.010 | 2   | 46.34717 | 7.43917  | 9.430  | 150 | 36 | -85 D  |
| 2000 | 9  | 8  | 21 | 18 | 2.600  | 1,7 | 44.19417 | 6.60933  | 4.910  | 336 | 85 | -97 D  |
| 2000 | 9  | 23 | 1  | 46 | 52.320 | 1,8 | 44.47833 | 6.44800  | 8.840  | 0   | 54 | -150 D |
| 2000 | 11 | 30 | 8  | 34 | 21.530 | 2,1 | 46.59233 | 8.43933  | 14.840 | 267 | 77 | 172 D  |
| 2000 | 12 | 3  | 4  | 23 | 58.890 | 2,4 | 45.19950 | 5.89017  | 9.850  | 53  | 45 | 128 D  |
| 2000 | 12 | 4  | 16 | 24 | 26.140 | 2,4 | 44.62917 | 7.59900  | 15.240 | 294 | 74 | 133 D  |
| 2000 | 12 | 19 | 14 | 20 | 49.240 | 3,3 | 43.80617 | 7.39050  | 6.920  | 103 | 74 | -154 D |
| 2000 | 12 | 20 | 5  | 45 | 14.690 | 2,8 | 43.79883 | 7.38200  | 7.630  | 122 | 35 | 151 D  |
| 2000 | 12 | 25 | 10 | 18 | 1.840  | 2,5 | 46.72283 | 8.97000  | 11.840 | 249 | 44 | -155 D |
| 2000 | 12 | 26 | 8  | 47 | 41.100 | 1,9 | 45.00083 | 7.20833  | 15.760 | 5   | 88 | 147 D  |
| 2001 | 1  | 25 | 2  | 17 | 14.320 | 2,5 | 46.03300 | 6.73600  | 6.850  | 45  | 73 | 162 D  |
| 2001 | 2  | 6  | 22 | 28 | 45.370 | 4,1 | 44.10683 | 8.67700  | 17.980 | 227 | 77 | -122 D |
| 2001 | 2  | 9  | 16 | 18 | 45.670 | 1,5 | 45.00250 | 7.17983  | 10.880 | 1   | 81 | 169 D  |
| 2001 | 2  | 23 | 19 | 13 | 24.240 | 2,2 | 44.63817 | 7.26667  | 13.000 | 2   | 81 | 159 D  |
| 2001 | 2  | 23 | 20 | 7  | 35.650 | 1,8 | 44.63633 | 7.25917  | 15.930 | 203 | 87 | 147 D  |
| 2001 | 2  | 23 | 22 | 19 | 41.290 | 3,3 | 46.14200 | 7.04050  | 8.200  | 224 | 83 | -144 A |
| 2001 | 2  | 25 | 1  | 22 | 30.490 | 2,8 | 46.14267 | 7.04017  | 7.700  | 230 | 83 | -159 B |
| 2001 | 2  | 25 | 18 | 34 | 41.780 | 4,7 | 43.48500 | 7.55600  | 20.880 | 97  | 86 | 110 C  |
| 2001 | 2  | 28 | 9  | 26 | 27.750 | 2,4 | 46.13667 | 7.03800  | 8.040  | 223 | 88 | 156 D  |
| 2001 | 2  | 28 | 13 | 5  | 17.900 | 1,7 | 44.11483 | 7.25783  | 14.130 | 182 | 43 | -77 D  |
| 2001 | 3  | 13 | 22 | 20 | 16.330 | 1,9 | 46.12983 | 7.04100  | 9.590  | 227 | 68 | 166 D  |
| 2001 | 3  | 17 | 0  | 29 | 59.490 | 3,4 | 46.92550 | 9.02617  | 8.660  | 262 | 79 | -165 D |



|      |    |    |    |    |        |     |          |         |        |     |    |        |
|------|----|----|----|----|--------|-----|----------|---------|--------|-----|----|--------|
| 2001 | 3  | 28 | 3  | 42 | 27.340 | 2,4 | 46.33500 | 7.45583 | 8.510  | 133 | 31 | -116 D |
| 2001 | 3  | 29 | 22 | 14 | 46.560 | 2,4 | 45.02800 | 7.68767 | 22.670 | 316 | 48 | 96 D   |
| 2001 | 4  | 9  | 9  | 11 | 58.640 | 2,3 | 45.39050 | 6.49717 | 7.950  | 248 | 54 | -93 D  |
| 2001 | 4  | 13 | 2  | 35 | 30.500 | 2,7 | 45.10183 | 6.83000 | 3.080  | 110 | 20 | -180 D |
| 2001 | 4  | 15 | 0  | 51 | 19.970 | 1,8 | 45.04633 | 6.55317 | 8.600  | 127 | 82 | -156 D |
| 2001 | 4  | 20 | 10 | 29 | 51.920 | 2,1 | 45.13617 | 7.04867 | 9.810  | 172 | 57 | 169 B  |
| 2001 | 4  | 30 | 8  | 4  | 50.500 | 2,4 | 44.88533 | 6.78217 | 8.840  | 12  | 85 | 162 D  |
| 2001 | 5  | 14 | 9  | 38 | 50.620 | 1,9 | 44.47050 | 6.53000 | 9.670  | 154 | 82 | -132 D |
| 2001 | 5  | 30 | 22 | 43 | 50.330 | 2,8 | 45.82383 | 6.48083 | 8.260  | 232 | 88 | 139 D  |
| 2001 | 6  | 2  | 23 | 8  | 28.570 | 1,6 | 45.01800 | 6.65683 | 9.840  | 123 | 89 | 126 D  |
| 2001 | 6  | 4  | 6  | 16 | 55.780 | 1,4 | 44.62133 | 6.68750 | 10.090 | 213 | 43 | -82 D  |
| 2001 | 6  | 12 | 14 | 54 | 25.580 | 2,7 | 46.37533 | 9.22833 | 12.400 | 354 | 86 | 173 D  |
| 2001 | 6  | 12 | 14 | 58 | 30.610 | 2,6 | 46.37467 | 9.22700 | 13.220 | 173 | 82 | 163 D  |
| 2001 | 6  | 15 | 13 | 47 | 36.320 | 1,9 | 44.48600 | 7.28533 | 13.970 | 202 | 56 | -106 D |
| 2001 | 6  | 17 | 4  | 15 | 25.460 | 1,7 | 44.99300 | 6.79700 | 11.350 | 271 | 12 | -166 D |
| 2001 | 7  | 1  | 19 | 37 | 18.960 | 3,2 | 44.56133 | 6.99517 | 8.020  | 316 | 85 | 178 D  |
| 2001 | 7  | 3  | 20 | 46 | 21.870 | 1,9 | 44.56633 | 6.98550 | 10.310 | 325 | 86 | -154 D |
| 2001 | 7  | 9  | 22 | 50 | 1.890  | 2,8 | 46.17717 | 7.64200 | 6.040  | 307 | 49 | -139 D |
| 2001 | 7  | 11 | 6  | 49 | 6.720  | 1,9 | 44.39983 | 6.99100 | 9.300  | 221 | 49 | -101 D |
| 2001 | 7  | 18 | 22 | 47 | 9.340  | 3,8 | 44.84400 | 8.42267 | 4.990  | 63  | 72 | -155 D |
| 2001 | 7  | 28 | 11 | 1  | 15.150 | 1,7 | 44.75583 | 6.67683 | 8.100  | 351 | 89 | 164 D  |
| 2001 | 7  | 28 | 18 | 10 | 15.540 | 1,8 | 44.55583 | 6.87817 | 9.540  | 275 | 69 | 134 D  |
| 2001 | 7  | 28 | 18 | 11 | 13.890 | 1,7 | 44.56067 | 6.87550 | 10.100 | 311 | 84 | -169 D |
| 2001 | 7  | 28 | 18 | 28 | 8.860  | 1,7 | 44.56033 | 6.87550 | 10.200 | 303 | 84 | 169 D  |
| 2001 | 7  | 31 | 14 | 38 | 21.910 | 1,8 | 45.87217 | 6.87917 | 5.860  | 19  | 64 | 169 D  |
| 2001 | 8  | 2  | 4  | 36 | 43.620 | 2   | 44.67467 | 7.21000 | 11.770 | 170 | 50 | -116 D |
| 2001 | 8  | 5  | 10 | 16 | 7.540  | 1,9 | 46.90133 | 9.00683 | 7.830  | 269 | 69 | 180 D  |
| 2001 | 8  | 9  | 12 | 16 | 12.090 | 1,6 | 44.67183 | 7.27417 | 17.050 | 198 | 86 | 156 D  |
| 2001 | 8  | 9  | 22 | 28 | 5.510  | 1,9 | 44.74950 | 6.68167 | 8.910  | 134 | 64 | -97 D  |
| 2001 | 8  | 13 | 4  | 4  | 36.710 | 1,7 | 44.17667 | 7.61667 | 7.500  | 50  | 81 | 149 D  |
| 2001 | 8  | 14 | 23 | 15 | 39.410 | 1,6 | 45.04800 | 7.57417 | 16.230 | 269 | 34 | 127 D  |
| 2001 | 8  | 19 | 22 | 16 | 15.580 | 2   | 45.11417 | 6.83717 | 6.620  | 207 | 68 | -140 D |
| 2001 | 9  | 6  | 18 | 20 | 46.820 | 1,6 | 44.57667 | 6.83050 | 7.290  | 72  | 30 | -74 D  |
| 2001 | 9  | 8  | 6  | 59 | 31.070 | 1,5 | 44.53400 | 7.25833 | 14.890 | 258 | 78 | 146 D  |
| 2001 | 9  | 9  | 16 | 49 | 7.390  | 1,7 | 44.81750 | 6.65867 | 7.480  | 162 | 27 | -142 D |
| 2001 | 9  | 13 | 10 | 6  | 26.450 | 1,9 | 44.99450 | 7.19783 | 12.820 | 17  | 84 | -154 D |
| 2001 | 9  | 13 | 14 | 17 | 10.640 | 1   | 44.57516 | 6.82417 | 10.140 | 216 | 25 | -168 D |
| 2001 | 9  | 20 | 21 | 12 | 54.360 | 1,3 | 44.37217 | 6.82450 | 8.710  | 294 | 83 | -151 D |
| 2001 | 9  | 27 | 1  | 2  | 35.250 | 2   | 46.57917 | 9.35967 | 9.910  | 123 | 83 | -80 D  |
| 2001 | 9  | 27 | 5  | 24 | 0.890  | 2,1 | 45.97000 | 6.42117 | 6.460  | 222 | 60 | 145 D  |
| 2001 | 9  | 27 | 21 | 4  | 47.880 | 1,8 | 44.35117 | 7.31517 | 16.770 | 2   | 41 | -78 D  |
| 2001 | 10 | 10 | 1  | 56 | 48.870 | 1,5 | 44.82733 | 7.26600 | 14.560 | 190 | 74 | -117 D |
| 2001 | 10 | 11 | 22 | 47 | 45.460 | 2,2 | 46.68583 | 7.23150 | 6.920  | 88  | 52 | -146 D |
| 2001 | 10 | 15 | 14 | 58 | 17.840 | 1,7 | 44.71100 | 6.76483 | 9.410  | 230 | 87 | -90 D  |
| 2001 | 10 | 16 | 4  | 18 | 28.460 | 2,7 | 45.11750 | 6.51367 | 7.380  | 245 | 44 | -116 B |
| 2001 | 10 | 16 | 23 | 41 | 13.850 | 1,4 | 44.78083 | 7.26300 | 11.920 | 56  | 90 | -150 D |
| 2001 | 10 | 17 | 4  | 57 | 41.770 | 1,9 | 45.11234 | 6.50983 | 6.460  | 253 | 54 | -114 D |
| 2001 | 10 | 17 | 5  | 2  | 36.260 | 1,7 | 45.10550 | 6.49167 | 7.100  | 264 | 51 | -130 D |
| 2001 | 10 | 22 | 19 | 34 | 34.670 | 1,8 | 44.29667 | 6.78867 | 12.940 | 182 | 54 | -107 D |
| 2001 | 10 | 23 | 7  | 10 | 1.960  | 2   | 46.00700 | 7.84483 | 6.720  | 275 | 76 | -129 D |
| 2001 | 10 | 23 | 13 | 24 | 38.770 | 2,4 | 44.01383 | 8.00750 | 11.100 | 278 | 37 | -150 D |
| 2001 | 11 | 1  | 2  | 39 | 5.960  | 1,7 | 44.33083 | 6.75067 | 9.740  | 342 | 81 | -134 D |
| 2001 | 11 | 2  | 9  | 4  | 7.500  | 2   | 45.62450 | 6.85850 | 10.240 | 258 | 57 | -110 C |

|      |    |    |    |    |        |     |          |          |        |     |    |        |
|------|----|----|----|----|--------|-----|----------|----------|--------|-----|----|--------|
| 2001 | 11 | 6  | 7  | 37 | 47.330 | 2   | 44.76517 | 7.65450  | 26.140 | 11  | 68 | 125 D  |
| 2001 | 11 | 6  | 18 | 59 | 9.180  | 1,9 | 45.12733 | 6.54700  | 8.210  | 184 | 61 | 179 D  |
| 2001 | 11 | 7  | 4  | 8  | 50.150 | 1,2 | 45.12517 | 6.52950  | 9.750  | 343 | 88 | -147 D |
| 2001 | 11 | 9  | 22 | 11 | 39.560 | 1,6 | 45.89133 | 6.91533  | 8.380  | 320 | 74 | 136 D  |
| 2001 | 11 | 10 | 1  | 58 | 7.320  | 2,4 | 44.35317 | 7.31533  | 15.460 | 154 | 32 | -108 D |
| 2001 | 11 | 21 | 23 | 17 | 35.360 | 2   | 45.00467 | 6.67417  | 9.000  | 23  | 81 | 167 D  |
| 2001 | 11 | 22 | 1  | 54 | 15.450 | 1,6 | 44.78333 | 6.65950  | 8.980  | 318 | 15 | -70 D  |
| 2001 | 12 | 21 | 16 | 44 | 47.210 | 1,6 | 45.55917 | 6.64600  | 10.360 | 332 | 50 | 147 D  |
| 2002 | 1  | 1  | 13 | 13 | 21.640 | 1,5 | 45.16050 | 6.64250  | 9.810  | 337 | 88 | -124 D |
| 2002 | 1  | 13 | 11 | 26 | 20.300 | 1,9 | 46.24400 | 7.19550  | 3.510  | 312 | 12 | 124 D  |
| 2002 | 1  | 18 | 11 | 14 | 55.090 | 3,3 | 46.58133 | 10.25800 | 6.540  | 292 | 82 | -138 D |
| 2002 | 1  | 24 | 19 | 35 | 45.950 | 1,3 | 45.18800 | 6.53000  | 9.450  | 168 | 60 | -156 D |
| 2002 | 1  | 26 | 7  | 35 | 46.730 | 2,9 | 44.37933 | 7.31300  | 16.380 | 14  | 38 | -109 B |
| 2002 | 1  | 27 | 13 | 39 | 12.910 | 2,2 | 44.37933 | 7.31083  | 16.930 | 20  | 38 | -91 D  |
| 2002 | 1  | 30 | 21 | 60 | 5.550  | 2,4 | 43.85867 | 7.72667  | 12.090 | 270 | 85 | 144 D  |
| 2002 | 2  | 1  | 3  | 10 | 8.370  | 2   | 45.92683 | 6.95083  | 7.990  | 25  | 67 | -140 D |
| 2002 | 2  | 2  | 14 | 26 | 19.300 | 2,8 | 43.85117 | 7.73500  | 12.780 | 261 | 67 | 151 D  |
| 2002 | 2  | 2  | 17 | 45 | 1.530  | 3,1 | 45.11917 | 6.53100  | 8.310  | 163 | 87 | -176 B |
| 2002 | 2  | 3  | 1  | 53 | 12.140 | 1,4 | 45.12100 | 6.51083  | 9.350  | 354 | 75 | 140 D  |
| 2002 | 2  | 11 | 13 | 53 | 31.910 | 1,4 | 44.76266 | 6.74433  | 8.790  | 286 | 66 | -119 D |
| 2002 | 2  | 14 | 17 | 58 | 28.370 | 2   | 45.41000 | 6.55550  | 7.550  | 59  | 87 | 100 D  |
| 2002 | 2  | 25 | 14 | 9  | 51.430 | 2,1 | 44.60250 | 6.79300  | 7.250  | 259 | 52 | -99 D  |
| 2002 | 2  | 28 | 14 | 28 | 17.560 | 1,8 | 43.85950 | 7.71900  | 11.530 | 247 | 47 | 154 D  |
| 2002 | 3  | 2  | 9  | 56 | 34.980 | 2,1 | 44.42683 | 7.37183  | 9.270  | 54  | 43 | 86 D   |
| 2002 | 3  | 6  | 8  | 40 | 0.530  | 1,5 | 44.56517 | 6.81333  | 8.880  | 47  | 71 | 117 D  |
| 2002 | 3  | 6  | 10 | 20 | 3.210  | 2   | 44.56533 | 6.81350  | 9.420  | 296 | 67 | -131 D |
| 2002 | 3  | 17 | 3  | 38 | 30.560 | 1,2 | 46.33450 | 7.47567  | 7.720  | 218 | 65 | 168 D  |
| 2002 | 3  | 20 | 14 | 44 | 12.810 | 2,8 | 46.20900 | 7.58133  | 8.320  | 289 | 60 | -115 D |
| 2002 | 3  | 31 | 19 | 39 | 26.890 | 2,4 | 46.89667 | 8.29367  | 5.680  | 68  | 80 | 165 D  |
| 2002 | 4  | 10 | 5  | 58 | 45.360 | 2,4 | 44.43350 | 7.04033  | 10.250 | 278 | 84 | -161 C |
| 2002 | 4  | 21 | 17 | 57 | 15.450 | 2,9 | 45.63783 | 7.81333  | 18.640 | 73  | 78 | -172 D |
| 2002 | 4  | 22 | 16 | 57 | 13.120 | 1,4 | 44.68250 | 6.75650  | 9.580  | 354 | 17 | -98 D  |
| 2002 | 4  | 28 | 9  | 6  | 45.180 | 2,4 | 46.26067 | 6.63967  | 0.230  | 339 | 80 | 176 D  |
| 2002 | 5  | 6  | 6  | 42 | 52.640 | 2,9 | 44.50083 | 7.29467  | 14.610 | 165 | 69 | -159 D |
| 2002 | 5  | 10 | 19 | 55 | 1.770  | 2,7 | 46.98600 | 9.15550  | 9.000  | 301 | 29 | -143 D |
| 2002 | 5  | 18 | 0  | 42 | 44.970 | 1,6 | 45.38800 | 6.44800  | 8.750  | 72  | 77 | 173 D  |
| 2002 | 5  | 25 | 7  | 29 | 18.580 | 2   | 44.28233 | 6.58167  | 8.240  | 243 | 14 | 4 D    |
| 2002 | 6  | 7  | 11 | 38 | 45.150 | 2,2 | 44.34566 | 7.28617  | 15.110 | 108 | 82 | -167 D |
| 2002 | 6  | 25 | 1  | 30 | 1.650  | 1,9 | 44.33083 | 6.76133  | 9.650  | 351 | 70 | -163 D |
| 2002 | 6  | 30 | 17 | 15 | 40.730 | 1,5 | 44.57583 | 6.82050  | 10.250 | 179 | 65 | -92 D  |
| 2002 | 7  | 4  | 20 | 13 | 3.430  | 1,8 | 44.48183 | 7.07783  | 10.330 | 336 | 69 | -170 D |
| 2002 | 7  | 16 | 5  | 10 | 46.040 | 1,6 | 44.83583 | 6.73583  | 11.360 | 78  | 50 | -61 D  |
| 2002 | 7  | 21 | 3  | 57 | 35.150 | 1,9 | 44.97883 | 6.79550  | 10.450 | 332 | 48 | -158 D |
| 2002 | 7  | 21 | 21 | 46 | 29.000 | 2,1 | 45.38933 | 6.54467  | 13.910 | 86  | 83 | -110 D |
| 2002 | 7  | 24 | 3  | 10 | 4.210  | 1,6 | 44.70250 | 6.69550  | 8.790  | 126 | 82 | -172 D |
| 2002 | 7  | 27 | 15 | 23 | 33.100 | 2,3 | 43.86633 | 7.46583  | 10.180 | 278 | 78 | -131 D |
| 2002 | 7  | 31 | 5  | 21 | 50.120 | 1,8 | 44.99917 | 7.18183  | 14.380 | 164 | 72 | 129 D  |
| 2002 | 8  | 6  | 8  | 53 | 32.450 | 1,4 | 44.62317 | 7.12550  | 12.550 | 131 | 87 | 157 D  |
| 2002 | 8  | 7  | 2  | 23 | 16.010 | 1,6 | 45.12366 | 7.34117  | 14.710 | 159 | 50 | 132 D  |
| 2002 | 8  | 12 | 22 | 7  | 24.630 | 2,2 | 45.97467 | 7.93267  | 11.310 | 245 | 71 | -163 D |
| 2002 | 8  | 22 | 16 | 56 | 14.820 | 1,5 | 44.63017 | 6.82983  | 6.680  | 93  | 69 | -172 D |
| 2002 | 9  | 21 | 23 | 43 | 6.950  | 1,7 | 46.07367 | 5.84533  | 11.030 | 120 | 67 | -112 D |
| 2002 | 9  | 22 | 9  | 53 | 56.190 | 1,9 | 44.63483 | 6.74600  | 8.800  | 83  | 32 | -84 D  |

|      |    |    |    |    |        |     |          |         |        |     |    |      |   |
|------|----|----|----|----|--------|-----|----------|---------|--------|-----|----|------|---|
| 2002 | 10 | 22 | 21 | 59 | 8.250  | 2,4 | 45.65200 | 6.33983 | 9.980  | 321 | 35 | -144 | D |
| 2002 | 10 | 30 | 2  | 47 | 2.200  | 2   | 45.80483 | 6.12550 | 7.040  | 278 | 73 | -158 | D |
| 2002 | 11 | 12 | 6  | 48 | 10.760 | 2,2 | 44.18450 | 7.71967 | 9.730  | 314 | 52 | -93  | C |
| 2002 | 11 | 17 | 8  | 52 | 25.840 | 1,7 | 45.79883 | 6.13233 | 9.630  | 299 | 86 | 176  | D |
| 2002 | 11 | 24 | 10 | 52 | 56.850 | 2,1 | 44.21583 | 7.22933 | 13.670 | 126 | 89 | 152  | D |
| 2002 | 11 | 27 | 7  | 46 | 28.530 | 2   | 44.58916 | 6.88550 | 10.230 | 56  | 84 | 146  | D |
| 2002 | 12 | 5  | 2  | 36 | 12.340 | 1,5 | 45.80033 | 6.13183 | 10.060 | 285 | 72 | -161 | D |
| 2002 | 12 | 19 | 16 | 2  | 0.140  | 2,2 | 45.15333 | 6.53800 | 10.240 | 19  | 53 | -139 | D |
| 2003 | 1  | 12 | 4  | 13 | 35.220 | 1,4 | 45.80333 | 6.13217 | 10.210 | 320 | 73 | -140 | D |
| 2003 | 1  | 20 | 7  | 59 | 49.680 | 2,2 | 44.47200 | 6.78517 | 8.750  | 148 | 83 | -159 | D |
| 2003 | 1  | 20 | 11 | 22 | 38.580 | 2,3 | 44.47233 | 6.79517 | 8.430  | 148 | 86 | -173 | D |
| 2003 | 1  | 21 | 23 | 27 | 11.720 | 1,8 | 44.66883 | 7.20067 | 14.490 | 319 | 87 | 162  | D |
| 2003 | 1  | 31 | 20 | 54 | 49.800 | 2,3 | 44.12167 | 6.83450 | 7.590  | 133 | 87 | -179 | D |
| 2003 | 2  | 6  | 9  | 23 | 38.370 | 2   | 44.46600 | 6.77700 | 8.500  | 144 | 86 | -155 | D |
| 2003 | 2  | 6  | 17 | 27 | 34.340 | 1,7 | 44.46533 | 6.77600 | 9.290  | 331 | 89 | 163  | D |
| 2003 | 2  | 7  | 18 | 8  | 3.560  | 1,2 | 45.41117 | 6.52750 | 10.180 | 0   | 22 | -113 | D |
| 2003 | 2  | 15 | 8  | 28 | 13.530 | 2,1 | 45.71433 | 6.56883 | 11.750 | 89  | 82 | -145 | D |
| 2003 | 3  | 1  | 3  | 48 | 17.010 | 1,2 | 44.46417 | 6.75683 | 8.720  | 337 | 43 | -73  | D |
| 2003 | 3  | 8  | 3  | 36 | 59.030 | 0,9 | 44.49317 | 6.86817 | 10.850 | 330 | 84 | 155  | D |
| 2003 | 3  | 9  | 14 | 27 | 4.670  | 1,7 | 44.52067 | 6.70033 | 12.130 | 184 | 88 | -141 | D |
| 2003 | 3  | 11 | 9  | 53 | 51.490 | 2,1 | 44.47250 | 6.76733 | 8.660  | 316 | 85 | 170  | D |
| 2003 | 3  | 11 | 10 | 1  | 13.440 | 1,9 | 44.47217 | 6.75483 | 8.440  | 316 | 45 | -139 | D |
| 2003 | 3  | 11 | 13 | 4  | 50.170 | 1,8 | 44.46717 | 6.75583 | 8.610  | 216 | 44 | -99  | D |
| 2003 | 3  | 12 | 23 | 47 | 14.320 | 1,8 | 44.52600 | 6.68700 | 9.860  | 59  | 50 | -85  | D |
| 2003 | 3  | 14 | 8  | 23 | 37.160 | 2,3 | 44.47267 | 6.76417 | 7.810  | 300 | 86 | 135  | D |
| 2003 | 3  | 20 | 4  | 21 | 4.480  | 1,3 | 44.51400 | 6.69033 | 10.280 | 195 | 72 | -122 | D |
| 2003 | 3  | 29 | 2  | 50 | 46.210 | 1,8 | 44.47150 | 6.76633 | 9.440  | 135 | 83 | -145 | D |
| 2003 | 3  | 31 | 6  | 9  | 53.990 | 1,8 | 45.01567 | 7.33050 | 17.520 | 150 | 79 | 136  | D |
| 2003 | 4  | 2  | 9  | 9  | 33.640 | 2,2 | 44.35883 | 7.30667 | 14.080 | 349 | 38 | -113 | D |
| 2003 | 4  | 4  | 19 | 44 | 30.380 | 1,3 | 44.51550 | 7.02933 | 10.950 | 352 | 58 | -99  | D |
| 2003 | 4  | 6  | 12 | 23 | 26.630 | 2   | 44.47350 | 6.76767 | 8.670  | 310 | 79 | 161  | D |
| 2003 | 4  | 9  | 23 | 10 | 10.610 | 1,4 | 44.76200 | 6.76217 | 9.490  | 292 | 55 | -172 | D |
| 2003 | 4  | 11 | 9  | 26 | 57.540 | 4,9 | 44.77383 | 8.91967 | 8.630  | 310 | 78 | 139  | B |
| 2003 | 4  | 13 | 8  | 5  | 19.780 | 1,3 | 44.46450 | 6.76783 | 8.840  | 114 | 65 | -87  | D |
| 2003 | 4  | 16 | 2  | 54 | 48.060 | 2,3 | 44.47850 | 6.77750 | 8.130  | 136 | 90 | -103 | D |
| 2003 | 4  | 16 | 2  | 57 | 2.520  | 1,6 | 44.47217 | 6.75750 | 9.430  | 143 | 51 | -159 | D |
| 2003 | 4  | 22 | 22 | 28 | 38.810 | 1,2 | 44.62767 | 6.81267 | 6.480  | 73  | 67 | -146 | D |
| 2003 | 4  | 26 | 3  | 54 | 9.870  | 2,3 | 45.22817 | 5.93517 | 6.620  | 212 | 84 | 178  | D |
| 2003 | 4  | 29 | 4  | 55 | 8.770  | 3,4 | 46.34683 | 7.57350 | 10.330 | 272 | 63 | -163 | C |
| 2003 | 5  | 13 | 1  | 54 | 32.970 | 2   | 45.08467 | 7.33183 | 16.060 | 25  | 56 | -101 | D |
| 2003 | 5  | 14 | 19 | 36 | 14.270 | 1,9 | 45.51333 | 5.11133 | 12.620 | 227 | 81 | 137  | D |
| 2003 | 5  | 20 | 13 | 12 | 2.770  | 1,5 | 44.58800 | 6.84933 | 10.210 | 55  | 69 | 122  | D |
| 2003 | 5  | 23 | 19 | 45 | 54.920 | 1,5 | 44.46533 | 6.78383 | 8.330  | 79  | 80 | -101 | D |
| 2003 | 5  | 25 | 23 | 3  | 31.680 | 3,4 | 45.13150 | 6.53967 | 7.530  | 173 | 80 | -157 | B |
| 2003 | 5  | 26 | 0  | 56 | 52.890 | 1,9 | 45.11800 | 6.52067 | 9.800  | 354 | 84 | -138 | D |
| 2003 | 6  | 3  | 17 | 8  | 19.250 | 1,9 | 44.70900 | 7.25750 | 16.360 | 20  | 76 | 172  | D |
| 2003 | 6  | 10 | 22 | 59 | 47.900 | 3,2 | 44.78584 | 7.60900 | 38.340 | 302 | 87 | 144  | D |
| 2003 | 6  | 21 | 22 | 10 | 40.390 | 1,4 | 44.45300 | 6.78433 | 10.130 | 291 | 90 | 106  | D |
| 2003 | 6  | 23 | 22 | 54 | 53.850 | 1,3 | 44.44467 | 6.78533 | 8.760  | 222 | 20 | -156 | D |
| 2003 | 6  | 23 | 23 | 40 | 44.740 | 2,1 | 44.44717 | 6.81550 | 8.450  | 196 | 33 | 169  | D |
| 2003 | 6  | 24 | 2  | 40 | 48.060 | 2,1 | 44.45967 | 6.81433 | 10.150 | 192 | 57 | -106 | D |
| 2003 | 6  | 24 | 8  | 59 | 37.510 | 1,9 | 44.45167 | 6.80683 | 10.110 | 10  | 83 | 117  | D |
| 2003 | 6  | 29 | 17 | 39 | 45.360 | 2,3 | 44.46583 | 6.80200 | 8.360  | 147 | 85 | -163 | D |

|      |   |    |    |    |        |     |          |         |        |     |    |        |
|------|---|----|----|----|--------|-----|----------|---------|--------|-----|----|--------|
| 2003 | 6 | 30 | 22 | 24 | 51.120 | 1,3 | 44.45233 | 6.78617 | 7.920  | 145 | 73 | -119 D |
| 2003 | 7 | 1  | 13 | 4  | 49.310 | 1,7 | 44.45817 | 6.77650 | 8.500  | 154 | 66 | -162 D |
| 2003 | 7 | 3  | 2  | 51 | 56.570 | 1,8 | 44.44767 | 6.78450 | 8.620  | 148 | 79 | -150 D |
| 2003 | 7 | 4  | 19 | 7  | 44.460 | 1,8 | 44.46617 | 6.78483 | 8.590  | 172 | 40 | -66 C  |
| 2003 | 7 | 4  | 20 | 18 | 12.540 | 1,3 | 44.45933 | 6.76817 | 10.270 | 143 | 89 | -156 D |
| 2003 | 7 | 5  | 4  | 9  | 6.000  | 1,2 | 44.46433 | 6.75817 | 9.910  | 295 | 87 | 165 D  |
| 2003 | 7 | 5  | 5  | 11 | 53.780 | 1,5 | 44.44683 | 6.78333 | 9.200  | 350 | 51 | -104 D |
| 2003 | 7 | 13 | 2  | 22 | 47.070 | 2   | 45.83133 | 7.14683 | 8.990  | 187 | 56 | -171 D |
| 2003 | 7 | 17 | 16 | 36 | 14.200 | 1,4 | 44.45317 | 6.79167 | 10.600 | 317 | 74 | -150 D |
| 2003 | 7 | 17 | 18 | 29 | 48.680 | 2,2 | 44.45783 | 6.81517 | 9.440  | 152 | 90 | -153 D |
| 2003 | 7 | 18 | 0  | 44 | 44.090 | 1,8 | 44.45217 | 6.78733 | 8.640  | 332 | 80 | 167 D  |
| 2003 | 7 | 18 | 11 | 1  | 35.300 | 3,6 | 46.69967 | 9.82167 | 2.100  | 167 | 45 | -101 D |
| 2003 | 7 | 19 | 7  | 7  | 28.790 | 1,6 | 44.45933 | 6.79667 | 9.370  | 161 | 84 | -155 D |
| 2003 | 7 | 19 | 11 | 1  | 23.230 | 1,4 | 44.46517 | 6.80517 | 10.690 | 150 | 87 | -157 D |
| 2003 | 7 | 20 | 14 | 40 | 38.070 | 2,3 | 44.56917 | 7.41733 | 13.660 | 309 | 89 | 177 D  |
| 2003 | 7 | 21 | 19 | 21 | 31.810 | 1,6 | 44.47250 | 6.79367 | 7.320  | 147 | 71 | -133 D |
| 2003 | 7 | 23 | 0  | 45 | 0.110  | 1,2 | 44.45250 | 6.79267 | 9.820  | 186 | 53 | -112 D |
| 2003 | 7 | 23 | 11 | 56 | 58.760 | 2,7 | 44.67167 | 7.21733 | 11.130 | 199 | 45 | -109 B |
| 2003 | 7 | 26 | 11 | 35 | 25.890 | 1   | 44.44584 | 6.77650 | 8.350  | 197 | 37 | -102 D |
| 2003 | 7 | 27 | 22 | 44 | 55.510 | 2,4 | 44.46467 | 6.78617 | 8.000  | 150 | 84 | -169 D |
| 2003 | 7 | 30 | 9  | 15 | 57.790 | 1,3 | 44.46000 | 6.76783 | 9.420  | 25  | 7  | 17 D   |
| 2003 | 8 | 1  | 13 | 35 | 57.020 | 1,5 | 44.45933 | 6.90050 | 10.250 | 137 | 86 | 163 D  |
| 2003 | 8 | 7  | 6  | 27 | 23.550 | 1,5 | 44.60117 | 6.70717 | 7.930  | 246 | 54 | -97 D  |
| 2003 | 8 | 7  | 20 | 54 | 15.170 | 2,1 | 44.47433 | 6.79467 | 7.010  | 303 | 79 | 137 D  |
| 2003 | 8 | 8  | 19 | 47 | 34.330 | 1,2 | 44.44617 | 6.77683 | 9.560  | 139 | 82 | -160 D |
| 2003 | 8 | 9  | 2  | 18 | 57.180 | 2,1 | 44.10767 | 7.18583 | 10.940 | 134 | 83 | 158 D  |
| 2003 | 8 | 9  | 5  | 15 | 35.290 | 1,1 | 44.47217 | 6.76733 | 10.310 | 142 | 87 | -155 D |
| 2003 | 8 | 9  | 13 | 27 | 40.260 | 1,3 | 44.46067 | 6.75900 | 9.120  | 4   | 34 | -91 D  |
| 2003 | 8 | 10 | 13 | 42 | 31.480 | 2,4 | 44.20317 | 6.85333 | 5.300  | 54  | 66 | -130 D |
| 2003 | 8 | 13 | 3  | 34 | 18.170 | 1,7 | 44.39867 | 7.30333 | 14.660 | 303 | 83 | 158 D  |
| 2003 | 8 | 13 | 13 | 24 | 42.630 | 1,5 | 44.42100 | 7.28733 | 16.470 | 179 | 44 | -105 D |
| 2003 | 8 | 14 | 6  | 39 | 3.010  | 1,2 | 44.52633 | 6.75683 | 10.160 | 247 | 83 | -94 D  |
| 2003 | 8 | 15 | 11 | 57 | 20.090 | 0,9 | 44.46567 | 6.74950 | 8.730  | 169 | 56 | -107 D |
| 2003 | 8 | 16 | 1  | 50 | 16.030 | 1,2 | 44.56833 | 7.24083 | 14.330 | 151 | 59 | -91 D  |
| 2003 | 8 | 17 | 19 | 12 | 0.390  | 2   | 44.50650 | 7.28683 | 14.060 | 199 | 88 | 141 D  |
| 2003 | 8 | 17 | 22 | 31 | 50.910 | 2,8 | 44.64233 | 6.86150 | 6.570  | 317 | 42 | -124 C |
| 2003 | 8 | 18 | 3  | 49 | 33.420 | 1,4 | 44.65400 | 6.84100 | 9.350  | 118 | 61 | -96 D  |
| 2003 | 8 | 18 | 12 | 10 | 21.980 | 1,5 | 44.46117 | 6.77500 | 9.120  | 317 | 86 | 154 D  |
| 2003 | 8 | 18 | 12 | 28 | 36.820 | 2   | 44.70567 | 7.20767 | 12.130 | 161 | 89 | -147 D |
| 2003 | 8 | 22 | 9  | 21 | 31.740 | 3,6 | 46.32650 | 7.32083 | 8.380  | 258 | 61 | -148 A |
| 2003 | 8 | 22 | 9  | 30 | 8.890  | 3,5 | 46.32000 | 7.31983 | 7.280  | 251 | 63 | -158 B |
| 2003 | 8 | 22 | 10 | 0  | 46.740 | 2,3 | 46.31483 | 7.33167 | 7.750  | 297 | 59 | -98 D  |
| 2003 | 8 | 22 | 10 | 16 | 49.040 | 2,2 | 46.32000 | 7.33917 | 8.070  | 317 | 67 | -93 D  |
| 2003 | 8 | 24 | 7  | 55 | 22.770 | 2   | 46.32450 | 7.33067 | 8.570  | 319 | 62 | -91 D  |
| 2003 | 8 | 26 | 10 | 39 | 37.560 | 1,7 | 44.47883 | 6.76617 | 9.460  | 154 | 85 | -152 D |
| 2003 | 8 | 30 | 2  | 2  | 41.480 | 1,9 | 44.47333 | 6.78617 | 9.130  | 289 | 75 | 142 D  |
| 2003 | 8 | 30 | 2  | 17 | 39.330 | 2,1 | 44.47950 | 6.78533 | 9.480  | 64  | 16 | 48 D   |
| 2003 | 8 | 30 | 3  | 24 | 27.200 | 1,5 | 44.46617 | 6.76733 | 9.390  | 299 | 83 | 142 D  |
| 2003 | 8 | 31 | 5  | 2  | 1.190  | 1,9 | 46.32000 | 7.34017 | 8.540  | 320 | 33 | -95 D  |
| 2003 | 8 | 31 | 23 | 8  | 30.310 | 2,3 | 44.45267 | 6.82317 | 9.340  | 0   | 78 | 130 D  |
| 2003 | 9 | 1  | 19 | 28 | 10.910 | 3,1 | 44.27317 | 7.44667 | 6.840  | 42  | 88 | -151 D |
| 2003 | 9 | 2  | 5  | 0  | 50.790 | 1,4 | 44.46367 | 6.76500 | 10.240 | 301 | 90 | 138 D  |
| 2003 | 9 | 2  | 10 | 10 | 40.340 | 1,6 | 44.47100 | 6.75933 | 10.120 | 338 | 53 | -102 D |

|      |    |    |    |           |              |         |        |     |    |        |
|------|----|----|----|-----------|--------------|---------|--------|-----|----|--------|
| 2003 | 9  | 3  | 4  | 49 31.670 | 1,3 44.46033 | 6.77433 | 10.190 | 285 | 90 | 158 D  |
| 2003 | 9  | 4  | 16 | 17 4.030  | 2 44.45233   | 6.80267 | 9.330  | 2   | 70 | 168 D  |
| 2003 | 9  | 7  | 11 | 50 2.010  | 1,1 44.45850 | 6.76833 | 10.100 | 24  | 47 | -111 D |
| 2003 | 9  | 12 | 10 | 14 19.930 | 2,2 44.46550 | 6.78517 | 8.680  | 129 | 81 | -146 D |
| 2003 | 9  | 17 | 23 | 16 7.240  | 1,1 44.47083 | 6.76767 | 11.060 | 133 | 78 | -153 D |
| 2003 | 9  | 24 | 13 | 41 43.670 | 1,5 44.45317 | 6.77750 | 9.070  | 300 | 73 | 153 D  |
| 2003 | 9  | 27 | 23 | 0 34.100  | 1,8 44.45250 | 6.81300 | 9.850  | 147 | 84 | 174 D  |
| 2003 | 9  | 27 | 23 | 6 37.620  | 1,5 44.44683 | 6.79650 | 9.830  | 116 | 51 | 150 D  |
| 2003 | 10 | 3  | 1  | 38 5.330  | 1,3 44.45033 | 6.77917 | 9.510  | 145 | 45 | 143 D  |
| 2003 | 10 | 3  | 1  | 42 27.450 | 2 44.45217   | 6.78667 | 9.160  | 327 | 86 | 165 D  |
| 2003 | 10 | 3  | 1  | 44 21.400 | 1 44.44483   | 6.78500 | 8.560  | 325 | 80 | 137 D  |
| 2003 | 10 | 3  | 2  | 19 18.020 | 1 44.45000   | 6.78350 | 8.710  | 138 | 76 | -127 D |
| 2003 | 10 | 6  | 12 | 40 17.960 | 2,6 44.47267 | 6.78367 | 8.710  | 126 | 81 | -163 D |
| 2003 | 10 | 6  | 19 | 18 55.790 | 1,2 44.45817 | 6.78517 | 10.820 | 118 | 73 | 165 D  |
| 2003 | 10 | 9  | 7  | 1 33.130  | 1,8 44.31917 | 7.26667 | 9.160  | 262 | 84 | -119 D |
| 2003 | 10 | 16 | 14 | 37 16.980 | 2,3 44.60317 | 7.01100 | 13.230 | 206 | 61 | -95 D  |
| 2003 | 10 | 16 | 15 | 21 47.170 | 1,4 44.60233 | 7.00117 | 14.680 | 8   | 38 | -137 D |
| 2003 | 10 | 16 | 15 | 46 41.590 | 2 44.60233   | 7.00250 | 13.950 | 358 | 45 | -100 D |
| 2003 | 10 | 16 | 16 | 12 40.760 | 2,7 44.46767 | 6.79383 | 9.140  | 153 | 83 | -170 D |
| 2003 | 10 | 16 | 16 | 23 25.720 | 2,8 44.60817 | 7.02983 | 12.620 | 24  | 41 | -100 B |
| 2003 | 10 | 17 | 3  | 10 39.700 | 1,4 44.79050 | 6.75600 | 11.320 | 129 | 68 | 118 D  |
| 2003 | 10 | 17 | 15 | 51 45.130 | 1,4 44.60733 | 7.01133 | 12.650 | 346 | 46 | -102 D |
| 2003 | 10 | 18 | 5  | 38 12.450 | 2,4 44.46617 | 6.79367 | 8.060  | 161 | 75 | -155 D |
| 2003 | 10 | 19 | 21 | 13 51.340 | 2,3 44.60833 | 7.01933 | 12.440 | 3   | 52 | -118 B |
| 2003 | 10 | 23 | 8  | 18 27.810 | 1,5 44.46650 | 6.75800 | 9.320  | 199 | 23 | -144 D |
| 2003 | 10 | 23 | 12 | 23 32.900 | 2 44.43850   | 6.80450 | 9.540  | 149 | 83 | -151 D |
| 2003 | 10 | 23 | 15 | 52 38.730 | 1,8 44.43717 | 6.79783 | 10.150 | 141 | 90 | 144 D  |
| 2003 | 10 | 24 | 12 | 6 10.910  | 1,4 44.44567 | 6.80117 | 9.850  | 180 | 19 | -79 D  |
| 2003 | 10 | 25 | 18 | 36 4.280  | 1,2 44.45217 | 6.79350 | 9.420  | 2   | 47 | -118 D |
| 2003 | 10 | 27 | 20 | 57 10.500 | 2,6 44.43917 | 6.80467 | 9.590  | 336 | 81 | -174 D |
| 2003 | 10 | 28 | 22 | 8 2.010   | 1,8 44.43333 | 6.79533 | 9.820  | 155 | 59 | 176 D  |
| 2003 | 10 | 30 | 1  | 12 9.760  | 2,3 44.97967 | 6.65733 | 8.660  | 325 | 88 | -148 D |
| 2003 | 10 | 30 | 15 | 48 4.020  | 1,5 44.81883 | 6.60200 | 10.500 | 187 | 47 | -61 D  |
| 2003 | 10 | 31 | 7  | 8 20.810  | 2 44.43900   | 6.79250 | 9.810  | 329 | 87 | 157 D  |
| 2003 | 10 | 31 | 14 | 54 41.100 | 2,1 44.43267 | 6.78917 | 9.540  | 349 | 59 | -119 D |
| 2003 | 11 | 2  | 2  | 57 48.440 | 1,7 44.46567 | 6.76550 | 9.280  | 136 | 79 | -130 D |
| 2003 | 11 | 2  | 3  | 51 57.570 | 1,8 44.47467 | 7.00167 | 11.550 | 208 | 33 | -99 D  |
| 2003 | 11 | 2  | 8  | 37 57.030 | 2,2 44.43350 | 7.31333 | 14.130 | 5   | 26 | 139 D  |
| 2003 | 11 | 2  | 17 | 31 29.740 | 1,3 44.43333 | 6.78933 | 9.370  | 146 | 73 | -121 D |
| 2003 | 11 | 2  | 17 | 34 31.720 | 1,4 44.43767 | 6.78833 | 10.090 | 9   | 71 | -98 D  |
| 2003 | 11 | 2  | 20 | 49 9.410  | 2 44.74233   | 8.87900 | 14.910 | 127 | 82 | -119 D |
| 2003 | 11 | 3  | 15 | 34 13.890 | 1,5 44.43817 | 6.79233 | 10.080 | 110 | 73 | 153 D  |
| 2003 | 11 | 11 | 14 | 1 29.470  | 2,1 44.41967 | 7.30750 | 13.220 | 131 | 66 | 153 D  |
| 2003 | 11 | 12 | 22 | 49 1.910  | 1,4 44.60783 | 7.00983 | 13.410 | 342 | 82 | -107 D |
| 2003 | 11 | 12 | 23 | 3 22.270  | 2,1 44.60833 | 7.01200 | 12.360 | 5   | 47 | -106 D |
| 2003 | 11 | 14 | 0  | 47 39.270 | 2,2 44.60817 | 7.02050 | 12.460 | 3   | 45 | -114 B |
| 2003 | 11 | 14 | 4  | 24 14.730 | 1,2 45.12017 | 6.52050 | 9.680  | 343 | 43 | 118 D  |
| 2003 | 11 | 15 | 16 | 48 26.850 | 1,8 44.46783 | 6.82167 | 9.410  | 322 | 78 | 159 D  |
| 2003 | 11 | 15 | 18 | 58 20.670 | 1,2 44.45900 | 6.78500 | 8.680  | 319 | 88 | 158 D  |
| 2003 | 11 | 17 | 17 | 20 52.270 | 1,4 44.43217 | 6.79550 | 9.410  | 163 | 85 | 147 D  |
| 2003 | 11 | 18 | 2  | 44 35.410 | 2,3 46.50333 | 9.09400 | 12.870 | 73  | 51 | -151 D |
| 2003 | 11 | 19 | 3  | 19 20.610 | 1,6 46.34700 | 7.52633 | 9.210  | 267 | 79 | -176 D |
| 2003 | 12 | 4  | 3  | 10 21.560 | 2,2 44.35917 | 7.29600 | 16.830 | 194 | 38 | -115 D |



|      |    |    |    |           |              |         |        |     |    |        |
|------|----|----|----|-----------|--------------|---------|--------|-----|----|--------|
| 2003 | 12 | 9  | 14 | 31 8.340  | 2,3 44.63050 | 7.26317 | 12.840 | 13  | 89 | -98 D  |
| 2003 | 12 | 9  | 18 | 3 6.840   | 2,4 45.36400 | 6.04767 | 11.150 | 204 | 73 | 149 D  |
| 2003 | 12 | 13 | 6  | 48 8.570  | 1,8 44.44517 | 6.79517 | 9.990  | 325 | 74 | -123 D |
| 2003 | 12 | 14 | 0  | 11 56.830 | 1,5 44.84450 | 6.73267 | 11.720 | 348 | 83 | 139 D  |
| 2003 | 12 | 14 | 10 | 13 58.760 | 2,1 44.66300 | 7.04900 | 14.840 | 356 | 65 | -114 D |
| 2003 | 12 | 14 | 10 | 30 28.890 | 1,1 44.66250 | 7.04783 | 14.990 | 301 | 88 | -127 D |
| 2003 | 12 | 19 | 0  | 37 36.100 | 2,9 44.47317 | 6.99583 | 4.260  | 148 | 68 | -171 D |
| 2003 | 12 | 19 | 0  | 54 29.830 | 1,6 44.47567 | 6.96250 | 10.020 | 148 | 87 | 161 D  |
| 2003 | 12 | 19 | 0  | 56 51.740 | 1,7 44.47250 | 6.95583 | 10.010 | 157 | 65 | -165 D |
| 2003 | 12 | 20 | 3  | 29 40.810 | 3,1 44.48817 | 7.22717 | 8.070  | 181 | 69 | -127 D |
| 2003 | 12 | 21 | 1  | 35 56.420 | 2,9 44.46200 | 6.98433 | 4.450  | 143 | 85 | -178 D |
| 2003 | 12 | 24 | 9  | 24 37.300 | 2,4 44.47450 | 6.98300 | 7.750  | 156 | 72 | -156 D |
| 2003 | 12 | 25 | 14 | 42 37.400 | 1,4 44.47500 | 6.97333 | 9.450  | 143 | 71 | 151 D  |
| 2003 | 12 | 26 | 8  | 50 28.610 | 1,4 44.44500 | 6.80567 | 9.890  | 2   | 60 | -133 D |
| 2003 | 12 | 28 | 19 | 46 16.010 | 1,8 45.10833 | 7.58950 | 29.010 | 113 | 50 | -80 D  |
| 2003 | 12 | 30 | 22 | 34 2.070  | 1,8 46.59483 | 6.99967 | 9.380  | 54  | 66 | -118 D |
| 2004 | 1  | 1  | 7  | 46 9.660  | 1,7 44.12967 | 6.94017 | 8.740  | 120 | 61 | -101 D |
| 2004 | 1  | 6  | 5  | 12 45.890 | 1,2 46.08167 | 6.90417 | 10.500 | 64  | 89 | -174 D |
| 2004 | 1  | 7  | 9  | 39 44.790 | 1,1 44.43900 | 6.78500 | 9.820  | 326 | 73 | -178 D |
| 2004 | 1  | 9  | 19 | 22 2.430  | 1 44.71667   | 6.80117 | 9.620  | 89  | 35 | -93 D  |
| 2004 | 1  | 14 | 11 | 51 37.490 | 1,6 46.31733 | 6.78467 | 6.980  | 132 | 61 | 156 D  |
| 2004 | 1  | 16 | 1  | 31 28.610 | 1,9 44.60133 | 6.80050 | 9.560  | 314 | 41 | 158 D  |
| 2004 | 1  | 21 | 1  | 42 32.650 | 2,3 44.43283 | 6.81400 | 9.490  | 139 | 58 | -163 D |
| 2004 | 1  | 25 | 14 | 17 10.190 | 1,7 46.10183 | 7.11050 | 7.820  | 211 | 80 | -158 D |
| 2004 | 1  | 25 | 21 | 55 47.180 | 1,5 44.68333 | 7.37917 | 19.750 | 118 | 72 | 157 D  |
| 2004 | 1  | 28 | 20 | 9 23.000  | 2,9 45.47133 | 5.46850 | 7.510  | 65  | 74 | -162 B |
| 2004 | 1  | 28 | 22 | 20 27.430 | 2,1 45.46500 | 5.45800 | 9.640  | 60  | 73 | -154 B |
| 2004 | 2  | 2  | 10 | 39 16.900 | 1,9 44.33183 | 7.34333 | 16.010 | 206 | 25 | -6 D   |
| 2004 | 2  | 5  | 0  | 42 59.830 | 1,3 46.12983 | 6.73050 | 10.580 | 63  | 68 | -151 D |
| 2004 | 2  | 6  | 2  | 24 55.390 | 1,3 44.43250 | 6.78600 | 8.730  | 329 | 86 | -148 D |
| 2004 | 2  | 11 | 21 | 27 31.400 | 0,8 44.45850 | 6.76783 | 12.110 | 153 | 82 | -145 D |
| 2004 | 2  | 12 | 1  | 13 16.140 | 1,1 45.41817 | 6.58433 | 10.300 | 220 | 75 | -116 D |
| 2004 | 2  | 18 | 14 | 26 1.380  | 2,8 46.59400 | 7.00800 | 7.250  | 61  | 69 | -167 D |
| 2004 | 2  | 18 | 14 | 31 57.750 | 3,1 46.59417 | 7.00683 | 5.790  | 63  | 73 | -166 D |
| 2004 | 2  | 18 | 15 | 29 35.580 | 2,3 46.58883 | 6.99600 | 6.600  | 236 | 83 | 165 D  |
| 2004 | 2  | 18 | 18 | 5 0.960   | 1,4 44.46717 | 6.76583 | 10.110 | 147 | 79 | -152 D |
| 2004 | 2  | 20 | 22 | 47 8.480  | 1,8 44.62200 | 6.74750 | 7.890  | 11  | 72 | -108 D |
| 2004 | 2  | 23 | 14 | 8 39.680  | 2,3 43.96233 | 7.25883 | 8.730  | 238 | 70 | 99 D   |
| 2004 | 2  | 26 | 20 | 34 30.620 | 1,8 44.79067 | 6.77333 | 10.440 | 50  | 62 | 91 D   |
| 2004 | 2  | 27 | 22 | 41 33.760 | 2,5 44.47300 | 6.79467 | 9.280  | 47  | 38 | -87 D  |
| 2004 | 2  | 28 | 22 | 59 31.270 | 2,9 45.47183 | 5.44933 | 10.970 | 243 | 90 | 145 B  |
| 2004 | 2  | 29 | 3  | 45 34.850 | 1,2 45.52533 | 6.06233 | 11.930 | 251 | 83 | -177 D |
| 2004 | 3  | 1  | 0  | 47 41.290 | 1,5 44.62750 | 6.70667 | 10.890 | 183 | 89 | -162 D |
| 2004 | 3  | 2  | 9  | 23 47.110 | 2,3 44.75583 | 7.63683 | 23.290 | 29  | 58 | 80 D   |
| 2004 | 3  | 3  | 10 | 48 52.870 | 2,2 44.00350 | 6.27567 | 3.810  | 311 | 77 | 171 D  |
| 2004 | 3  | 5  | 18 | 26 32.800 | 1,5 44.58050 | 6.83167 | 10.410 | 12  | 42 | -108 D |
| 2004 | 3  | 5  | 18 | 27 15.990 | 2 44.58050   | 6.83433 | 10.410 | 194 | 51 | -92 A  |
| 2004 | 3  | 8  | 12 | 2 13.780  | 2,8 43.44450 | 5.49633 | 0.140  | 322 | 70 | 101 D  |
| 2004 | 3  | 9  | 1  | 44 30.800 | 1,4 44.43800 | 6.79617 | 10.720 | 324 | 83 | -168 D |
| 2004 | 3  | 10 | 20 | 3 39.870  | 1,5 44.60050 | 6.91750 | 9.680  | 120 | 55 | 152 D  |
| 2004 | 3  | 14 | 22 | 48 51.540 | 1,3 44.52050 | 6.87333 | 10.340 | 221 | 56 | -104 D |
| 2004 | 3  | 16 | 10 | 45 14.900 | 1,3 44.50017 | 6.71233 | 11.460 | 160 | 58 | -103 D |
| 2004 | 3  | 18 | 3  | 8 3.590   | 1,5 44.85150 | 7.32267 | 18.340 | 91  | 34 | -96 D  |

|      |   |    |    |    |        |     |          |         |        |     |    |        |
|------|---|----|----|----|--------|-----|----------|---------|--------|-----|----|--------|
| 2004 | 3 | 20 | 19 | 40 | 43.800 | 1,9 | 44.41500 | 7.29467 | 14.770 | 119 | 43 | -97 D  |
| 2004 | 3 | 20 | 22 | 12 | 5.030  | 1,6 | 44.50650 | 6.71883 | 9.460  | 7   | 82 | 175 D  |
| 2004 | 3 | 23 | 17 | 20 | 48.160 | 1,6 | 45.31017 | 6.52550 | 8.250  | 317 | 34 | -110 D |
| 2004 | 3 | 27 | 0  | 50 | 42.170 | 1,7 | 44.44550 | 6.77833 | 7.310  | 204 | 41 | -96 D  |
| 2004 | 4 | 2  | 3  | 37 | 9.260  | 1,2 | 44.45200 | 6.78433 | 9.260  | 323 | 83 | -129 D |
| 2004 | 4 | 3  | 16 | 8  | 44.060 | 1,6 | 44.46650 | 6.75767 | 10.820 | 148 | 75 | -162 D |
| 2004 | 4 | 5  | 8  | 43 | 55.490 | 2,1 | 44.76400 | 7.67283 | 25.830 | 37  | 68 | -156 D |
| 2004 | 4 | 12 | 5  | 5  | 44.310 | 1,5 | 45.56116 | 6.14117 | 11.540 | 237 | 46 | 115 D  |
| 2004 | 4 | 16 | 21 | 36 | 56.420 | 1,6 | 44.43033 | 6.79483 | 10.290 | 194 | 50 | -96 D  |
| 2004 | 4 | 17 | 20 | 56 | 5.040  | 1,5 | 46.29100 | 7.20283 | 10.750 | 60  | 90 | -134 D |
| 2004 | 4 | 17 | 23 | 15 | 44.090 | 1,6 | 46.29117 | 7.20333 | 11.010 | 241 | 78 | -159 D |
| 2004 | 4 | 21 | 7  | 53 | 27.280 | 1,7 | 46.28767 | 7.20400 | 10.280 | 268 | 56 | 155 D  |
| 2004 | 4 | 23 | 1  | 15 | 17.970 | 1,7 | 46.28133 | 7.21367 | 9.980  | 101 | 88 | 145 D  |
| 2004 | 4 | 24 | 15 | 35 | 17.560 | 2,4 | 44.82950 | 8.42567 | 12.380 | 59  | 79 | -135 D |
| 2004 | 4 | 26 | 2  | 26 | 56.420 | 2,3 | 44.45950 | 6.78617 | 9.320  | 143 | 79 | -159 D |
| 2004 | 4 | 26 | 2  | 31 | 54.560 | 1,1 | 44.45833 | 6.77433 | 9.940  | 315 | 75 | 142 D  |
| 2004 | 4 | 26 | 18 | 12 | 0.610  | 2,4 | 45.08350 | 7.37067 | 12.860 | 232 | 40 | -114 A |
| 2004 | 4 | 28 | 16 | 32 | 18.820 | 1,6 | 44.55567 | 6.84083 | 10.100 | 350 | 41 | -113 D |
| 2004 | 5 | 2  | 9  | 54 | 38.910 | 1,1 | 44.63483 | 6.86917 | 9.630  | 56  | 77 | 155 D  |
| 2004 | 5 | 2  | 20 | 2  | 17.010 | 1,4 | 44.46467 | 6.76983 | 10.700 | 155 | 81 | -148 D |
| 2004 | 5 | 3  | 23 | 26 | 39.710 | 1,6 | 46.29117 | 7.20333 | 11.010 | 72  | 87 | -173 D |
| 2004 | 5 | 8  | 6  | 52 | 21.450 | 1,8 | 44.81816 | 7.56350 | 15.840 | 110 | 78 | -116 D |
| 2004 | 5 | 8  | 12 | 38 | 42.800 | 2,3 | 44.63717 | 7.23000 | 9.010  | 162 | 57 | -127 D |
| 2004 | 5 | 14 | 0  | 30 | 34.230 | 3,4 | 45.09017 | 7.38700 | 9.800  | 210 | 90 | 174 D  |
| 2004 | 5 | 17 | 8  | 35 | 6.060  | 2,2 | 45.70150 | 6.93817 | 11.880 | 2   | 84 | 127 D  |
| 2004 | 5 | 22 | 18 | 39 | 39.600 | 1,6 | 44.46533 | 7.18450 | 11.720 | 133 | 44 | 116 D  |
| 2004 | 5 | 24 | 21 | 44 | 48.230 | 1,3 | 44.43200 | 6.80417 | 11.310 | 158 | 80 | 145 D  |
| 2004 | 5 | 25 | 18 | 39 | 8.950  | 2,1 | 46.00217 | 7.94200 | 12.160 | 62  | 78 | 132 D  |
| 2004 | 5 | 30 | 7  | 20 | 15.220 | 2,3 | 46.28667 | 7.20550 | 9.590  | 89  | 87 | 163 D  |
| 2004 | 5 | 30 | 9  | 46 | 17.210 | 2,5 | 46.28417 | 7.21300 | 9.370  | 85  | 82 | -152 D |
| 2004 | 6 | 12 | 1  | 4  | 43.230 | 2,2 | 44.19300 | 6.52750 | 7.140  | 152 | 80 | -157 D |
| 2004 | 6 | 12 | 1  | 28 | 2.350  | 1,5 | 46.28367 | 7.20133 | 8.020  | 56  | 85 | -179 D |
| 2004 | 6 | 12 | 4  | 44 | 33.010 | 3   | 45.71883 | 6.95617 | 9.660  | 10  | 78 | -173 A |
| 2004 | 6 | 12 | 16 | 47 | 23.800 | 2,3 | 46.28517 | 7.21000 | 9.600  | 274 | 88 | -176 D |
| 2004 | 6 | 17 | 11 | 28 | 20.960 | 2,4 | 44.82317 | 8.42617 | 13.950 | 91  | 77 | -142 D |
| 2004 | 6 | 17 | 17 | 1  | 15.620 | 1,7 | 45.69750 | 6.89767 | 10.390 | 360 | 75 | 110 D  |
| 2004 | 6 | 23 | 23 | 10 | 52.130 | 2,2 | 44.41533 | 7.31233 | 12.750 | 22  | 49 | -93 D  |
| 2004 | 6 | 30 | 18 | 53 | 60.730 | 2,3 | 44.75817 | 6.78283 | 8.920  | 48  | 89 | 110 D  |
| 2004 | 7 | 4  | 16 | 41 | 11.690 | 1,6 | 45.18200 | 6.75933 | 8.500  | 2   | 90 | 160 D  |
| 2004 | 7 | 7  | 20 | 59 | 44.280 | 1,7 | 45.56333 | 6.14583 | 12.580 | 63  | 57 | 128 D  |
| 2004 | 7 | 11 | 11 | 12 | 48.590 | 1,5 | 45.00500 | 6.57700 | 10.500 | 245 | 49 | -109 D |
| 2004 | 7 | 12 | 20 | 45 | 11.400 | 1,8 | 45.66000 | 5.97200 | 8.220  | 63  | 70 | -108 D |
| 2004 | 7 | 16 | 23 | 59 | 41.740 | 2   | 44.47400 | 7.14400 | 8.890  | 239 | 75 | -155 D |
| 2004 | 7 | 17 | 12 | 32 | 29.210 | 2,2 | 46.01233 | 6.64033 | 7.650  | 166 | 74 | -158 D |
| 2004 | 7 | 19 | 6  | 26 | 30.670 | 2   | 44.95350 | 5.69583 | 9.160  | 19  | 56 | 120 D  |
| 2004 | 7 | 20 | 3  | 19 | 15.420 | 1,7 | 44.42667 | 6.78833 | 9.410  | 158 | 67 | 138 D  |
| 2004 | 7 | 20 | 3  | 32 | 11.280 | 1,3 | 44.42533 | 6.79600 | 9.190  | 180 | 23 | -137 D |
| 2004 | 7 | 20 | 4  | 12 | 19.760 | 2,3 | 44.42567 | 6.79433 | 8.410  | 161 | 81 | -173 D |
| 2004 | 7 | 21 | 12 | 20 | 18.260 | 2,1 | 44.39817 | 6.61550 | 9.750  | 23  | 84 | 84 D   |
| 2004 | 7 | 21 | 19 | 37 | 7.630  | 1,6 | 44.35767 | 7.22283 | 13.930 | 87  | 75 | 167 D  |
| 2004 | 7 | 22 | 10 | 44 | 30.670 | 1,1 | 44.56617 | 6.88900 | 9.280  | 190 | 80 | -156 D |
| 2004 | 7 | 24 | 21 | 3  | 1.400  | 2,5 | 44.42717 | 6.81267 | 7.890  | 153 | 89 | 148 D  |
| 2004 | 7 | 24 | 21 | 3  | 39.440 | 2,6 | 44.42533 | 6.80217 | 8.290  | 347 | 81 | 168 D  |

|      |    |    |    |           |              |          |        |     |    |        |
|------|----|----|----|-----------|--------------|----------|--------|-----|----|--------|
| 2004 | 7  | 24 | 22 | 7 49.270  | 1,6 44.42467 | 6.79450  | 8.720  | 145 | 79 | 160 D  |
| 2004 | 7  | 25 | 9  | 59 13.250 | 1,8 44.42600 | 6.81500  | 7.660  | 153 | 85 | 135 D  |
| 2004 | 7  | 28 | 8  | 32 36.460 | 1,5 44.82617 | 7.17350  | 14.110 | 141 | 70 | -135 D |
| 2004 | 7  | 28 | 13 | 27 13.780 | 1,3 44.42633 | 6.79533  | 9.580  | 125 | 72 | 136 D  |
| 2004 | 7  | 28 | 17 | 3 38.030  | 1,4 44.19883 | 6.55700  | 9.770  | 122 | 84 | 112 D  |
| 2004 | 7  | 30 | 8  | 31 30.000 | 1,2 44.41983 | 6.78483  | 9.110  | 160 | 81 | 167 D  |
| 2004 | 7  | 30 | 8  | 46 59.480 | 1,2 44.42600 | 6.78517  | 9.340  | 228 | 53 | -88 D  |
| 2004 | 8  | 4  | 12 | 29 0.840  | 1,5 44.43800 | 6.79600  | 7.900  | 172 | 87 | 167 D  |
| 2004 | 8  | 4  | 22 | 4 30.900  | 1,3 44.44517 | 6.79483  | 9.150  | 158 | 72 | 140 D  |
| 2004 | 8  | 7  | 7  | 9 57.290  | 1 44.12817   | 6.70500  | 10.120 | 336 | 45 | -88 D  |
| 2004 | 8  | 8  | 13 | 22 4.020  | 1,4 44.42484 | 6.80483  | 9.360  | 351 | 82 | -131 D |
| 2004 | 8  | 9  | 11 | 33 35.280 | 1,7 44.42550 | 6.80400  | 9.930  | 150 | 79 | 175 D  |
| 2004 | 8  | 10 | 6  | 59 12.340 | 1,5 44.49300 | 7.25783  | 15.610 | 352 | 87 | -127 D |
| 2004 | 8  | 10 | 18 | 8 35.950  | 1 44.41983   | 6.79667  | 9.370  | 19  | 74 | -108 D |
| 2004 | 8  | 12 | 22 | 16 46.720 | 1,8 45.55600 | 6.84967  | 9.660  | 244 | 43 | -130 D |
| 2004 | 8  | 13 | 21 | 37 26.050 | 1,3 44.42367 | 6.79600  | 9.960  | 138 | 79 | -143 D |
| 2004 | 8  | 26 | 9  | 38 11.750 | 2 44.41883   | 6.80517  | 10.760 | 200 | 82 | -179 D |
| 2004 | 8  | 30 | 2  | 23 2.310  | 1,5 44.41867 | 6.77050  | 10.810 | 170 | 48 | 172 D  |
| 2004 | 8  | 31 | 23 | 29 30.060 | 1,3 46.04333 | 6.88400  | 9.640  | 280 | 17 | -143 D |
| 2004 | 9  | 1  | 17 | 4 37.580  | 2,3 44.45917 | 6.78550  | 9.380  | 145 | 84 | -163 D |
| 2004 | 9  | 2  | 10 | 44 5.360  | 1,7 44.19767 | 7.22783  | 13.680 | 220 | 61 | -99 D  |
| 2004 | 9  | 3  | 9  | 25 30.040 | 1,8 45.79550 | 6.51733  | 11.380 | 55  | 78 | -156 D |
| 2004 | 9  | 3  | 21 | 35 2.900  | 2,1 46.44167 | 8.09433  | 11.380 | 93  | 88 | 172 D  |
| 2004 | 9  | 6  | 22 | 1 25.990  | 1,9 44.49200 | 6.81517  | 8.550  | 345 | 82 | 136 D  |
| 2004 | 9  | 19 | 21 | 24 44.710 | 1,4 44.63433 | 6.75617  | 9.410  | 163 | 88 | -158 D |
| 2004 | 9  | 21 | 9  | 57 4.220  | 2 44.91283   | 6.61933  | 9.700  | 126 | 89 | 166 D  |
| 2004 | 9  | 23 | 15 | 19 55.340 | 2 44.42400   | 6.67917  | 10.800 | 158 | 76 | 111 D  |
| 2004 | 9  | 24 | 7  | 8 11.230  | 2,1 45.66750 | 5.50117  | 11.170 | 249 | 83 | 156 D  |
| 2004 | 9  | 29 | 8  | 45 8.000  | 2 45.04550   | 6.57717  | 11.920 | 312 | 73 | -166 D |
| 2004 | 9  | 29 | 9  | 49 22.670 | 1,9 44.57500 | 6.99017  | 12.510 | 3   | 56 | -105 D |
| 2004 | 9  | 30 | 10 | 6 14.120  | 2,1 44.40600 | 7.07017  | 9.960  | 281 | 84 | 176 D  |
| 2004 | 10 | 1  | 17 | 15 44.950 | 1,3 44.87217 | 6.72650  | 8.940  | 102 | 77 | -98 D  |
| 2004 | 10 | 1  | 18 | 47 34.890 | 1,5 45.07950 | 6.49383  | 11.820 | 151 | 48 | -150 D |
| 2004 | 10 | 2  | 22 | 35 18.050 | 1,4 45.73700 | 7.08750  | 10.960 | 193 | 84 | -131 D |
| 2004 | 10 | 13 | 1  | 38 26.280 | 1,9 44.35250 | 7.30450  | 16.110 | 91  | 66 | -86 D  |
| 2004 | 10 | 14 | 22 | 40 10.750 | 1,6 46.01283 | 7.51383  | 7.690  | 78  | 81 | -175 D |
| 2004 | 10 | 25 | 1  | 40 52.870 | 1,6 44.42250 | 6.48300  | 11.100 | 139 | 73 | 178 D  |
| 2004 | 10 | 25 | 16 | 35 24.090 | 1,2 45.32117 | 6.56383  | 10.310 | 6   | 77 | 152 D  |
| 2004 | 10 | 30 | 21 | 27 30.790 | 2 44.41250   | 6.80633  | 9.530  | 135 | 75 | 171 D  |
| 2004 | 10 | 31 | 14 | 25 51.300 | 1,5 44.41283 | 6.81167  | 9.780  | 140 | 67 | 141 D  |
| 2004 | 11 | 4  | 12 | 28 35.400 | 1,9 44.43300 | 6.78733  | 7.650  | 145 | 81 | 170 D  |
| 2004 | 11 | 8  | 0  | 37 23.690 | 1,4 44.55067 | 7.25633  | 15.620 | 7   | 54 | -93 D  |
| 2004 | 11 | 13 | 21 | 15 8.010  | 1,7 44.47967 | 6.78500  | 9.340  | 20  | 49 | -96 D  |
| 2004 | 11 | 15 | 0  | 13 39.030 | 1,6 45.02517 | 6.36967  | 10.270 | 291 | 26 | 99 D   |
| 2004 | 11 | 19 | 5  | 37 25.780 | 1,5 44.47267 | 6.77450  | 8.700  | 149 | 72 | -138 D |
| 2004 | 11 | 19 | 11 | 36 34.780 | 1,8 44.48600 | 6.78500  | 9.360  | 147 | 80 | -121 D |
| 2004 | 11 | 20 | 18 | 25 53.990 | 2,4 44.75867 | 7.64467  | 21.710 | 317 | 38 | 109 D  |
| 2004 | 11 | 24 | 22 | 59 41.220 | 5,4 45.68800 | 10.31133 | 49.770 | 152 | 66 | -156 D |
| 2004 | 11 | 30 | 13 | 14 10.040 | 2,1 45.08700 | 6.50333  | 8.150  | 268 | 48 | -81 D  |
| 2004 | 12 | 1  | 6  | 18 1.320  | 1,9 46.35050 | 6.84383  | 8.470  | 246 | 60 | 153 D  |
| 2004 | 12 | 3  | 22 | 28 59.260 | 2,6 44.34433 | 7.31650  | 15.170 | 298 | 43 | -115 B |
| 2004 | 12 | 3  | 23 | 54 8.120  | 1,3 44.60100 | 7.22917  | 17.860 | 107 | 41 | -107 D |
| 2004 | 12 | 5  | 2  | 3 20.440  | 1,4 44.17700 | 6.74183  | 9.720  | 132 | 75 | -163 D |

|      |    |    |    |    |        |     |          |         |        |     |    |        |
|------|----|----|----|----|--------|-----|----------|---------|--------|-----|----|--------|
| 2004 | 12 | 6  | 14 | 40 | 59.940 | 2   | 44.47967 | 6.78217 | 9.180  | 176 | 61 | -141 D |
| 2004 | 12 | 6  | 23 | 49 | 14.100 | 1,8 | 44.47950 | 6.78433 | 9.320  | 227 | 46 | -84 D  |
| 2004 | 12 | 14 | 6  | 58 | 39.570 | 1,9 | 44.78267 | 7.65483 | 26.540 | 154 | 53 | 148 D  |
| 2005 | 1  | 4  | 1  | 13 | 18.610 | 1,8 | 44.52167 | 7.23750 | 16.540 | 343 | 52 | -140 D |
| 2005 | 1  | 18 | 5  | 55 | 14.660 | 1,5 | 44.60833 | 7.23500 | 18.430 | 311 | 84 | -138 D |
| 2005 | 1  | 23 | 2  | 30 | 11.520 | 1,9 | 45.06116 | 7.57367 | 22.730 | 359 | 86 | -133 D |
| 2005 | 1  | 23 | 11 | 19 | 11.620 | 2   | 44.48033 | 6.77667 | 9.350  | 164 | 81 | -145 D |
| 2005 | 1  | 23 | 13 | 20 | 32.720 | 1,2 | 44.62750 | 6.70733 | 10.190 | 181 | 85 | -144 D |
| 2005 | 3  | 2  | 3  | 40 | 0.400  | 1,5 | 45.72817 | 5.85283 | 7.910  | 221 | 72 | 140 D  |
| 2005 | 3  | 13 | 13 | 1  | 5.660  | 2,2 | 44.46850 | 6.98200 | 5.760  | 156 | 86 | -154 D |
| 2005 | 3  | 14 | 21 | 36 | 23.580 | 1,5 | 44.63533 | 6.72783 | 10.230 | 306 | 82 | -137 D |
| 2005 | 3  | 15 | 3  | 19 | 5.340  | 1,8 | 44.63583 | 6.85650 | 6.650  | 52  | 20 | -79 D  |
| 2005 | 3  | 20 | 11 | 35 | 26.240 | 1,4 | 45.79367 | 6.33467 | 8.420  | 80  | 90 | -128 D |
| 2005 | 3  | 23 | 13 | 56 | 33.250 | 2   | 46.48950 | 7.51867 | 11.370 | 108 | 64 | -148 D |
| 2005 | 3  | 25 | 23 | 19 | 28.170 | 3,6 | 44.48734 | 7.28533 | 14.160 | 214 | 46 | -77 B  |
| 2005 | 4  | 2  | 4  | 33 | 51.290 | 2,9 | 44.75683 | 6.77417 | 9.100  | 330 | 24 | -134 C |
| 2005 | 4  | 2  | 8  | 3  | 33.040 | 2,1 | 44.44800 | 7.28367 | 14.160 | 341 | 77 | 151 D  |
| 2005 | 4  | 8  | 2  | 5  | 52.060 | 2,2 | 44.40017 | 7.30133 | 16.290 | 164 | 38 | -107 D |
| 2005 | 4  | 9  | 2  | 21 | 8.470  | 1,5 | 44.51417 | 6.87967 | 10.970 | 299 | 88 | -170 D |
| 2005 | 4  | 9  | 21 | 51 | 36.890 | 2   | 44.50917 | 7.11333 | 10.930 | 341 | 38 | -141 D |
| 2005 | 4  | 10 | 8  | 4  | 37.870 | 3,1 | 45.35800 | 6.58167 | 9.540  | 255 | 46 | -115 B |
| 2005 | 4  | 10 | 12 | 1  | 15.230 | 2   | 45.35700 | 6.57467 | 9.780  | 253 | 52 | -103 D |
| 2005 | 4  | 10 | 13 | 46 | 34.060 | 2,4 | 45.35033 | 6.57717 | 8.900  | 271 | 52 | -125 D |
| 2005 | 4  | 18 | 11 | 49 | 13.360 | 1,5 | 44.52234 | 6.93517 | 10.890 | 304 | 87 | -153 D |
| 2005 | 4  | 18 | 12 | 13 | 10.700 | 0,9 | 44.52017 | 6.92617 | 10.880 | 334 | 79 | -118 D |
| 2005 | 4  | 22 | 22 | 12 | 20.180 | 1,2 | 44.51483 | 7.27417 | 11.680 | 319 | 88 | -137 D |
| 2005 | 4  | 23 | 9  | 29 | 47.350 | 1,3 | 44.46750 | 6.96567 | 8.770  | 34  | 54 | -94 D  |
| 2005 | 4  | 23 | 19 | 53 | 10.870 | 2,2 | 44.49150 | 6.44800 | 6.590  | 126 | 87 | -168 D |
| 2005 | 5  | 3  | 0  | 50 | 8.630  | 1,2 | 44.46650 | 6.95517 | 10.260 | 117 | 42 | -121 D |
| 2005 | 5  | 3  | 11 | 37 | 32.280 | 1,7 | 44.40434 | 7.29633 | 16.890 | 164 | 55 | -106 D |
| 2005 | 5  | 4  | 15 | 57 | 33.570 | 2,3 | 44.23283 | 7.45500 | 12.940 | 355 | 41 | -114 D |
| 2005 | 5  | 17 | 4  | 59 | 27.230 | 2,2 | 44.48050 | 7.30233 | 14.130 | 17  | 29 | -85 D  |
| 2005 | 5  | 17 | 21 | 8  | 42.200 | 1,8 | 45.73817 | 7.07233 | 11.380 | 12  | 75 | 154 D  |
| 2005 | 5  | 19 | 17 | 16 | 28.060 | 2,6 | 45.90600 | 8.20317 | 9.980  | 81  | 89 | 161 D  |
| 2005 | 5  | 20 | 15 | 44 | 44.050 | 1,8 | 44.66350 | 7.23600 | 16.430 | 154 | 45 | -102 D |
| 2005 | 5  | 20 | 16 | 8  | 56.420 | 2,5 | 44.37317 | 7.24650 | 10.830 | 315 | 53 | -110 C |
| 2005 | 5  | 25 | 11 | 15 | 55.450 | 1,2 | 45.56116 | 6.21817 | 11.440 | 27  | 68 | 178 D  |
| 2005 | 5  | 25 | 16 | 35 | 46.450 | 2,4 | 44.88550 | 6.73050 | 10.220 | 331 | 49 | -167 D |
| 2005 | 5  | 27 | 18 | 55 | 10.630 | 1,1 | 44.45767 | 6.77550 | 10.280 | 139 | 83 | -133 D |
| 2005 | 5  | 31 | 23 | 20 | 51.420 | 1,6 | 44.48650 | 6.93317 | 9.280  | 311 | 24 | -154 D |
| 2005 | 6  | 3  | 2  | 9  | 44.800 | 1,5 | 44.46750 | 6.95617 | 10.210 | 281 | 77 | -148 D |
| 2005 | 6  | 6  | 21 | 35 | 46.630 | 1,4 | 44.64034 | 6.91517 | 10.300 | 33  | 57 | -128 D |
| 2005 | 6  | 11 | 3  | 10 | 9.260  | 1,3 | 44.64267 | 6.92400 | 10.170 | 303 | 86 | -102 D |
| 2005 | 6  | 12 | 17 | 2  | 8.920  | 2   | 45.56317 | 6.21750 | 12.040 | 225 | 84 | -154 D |
| 2005 | 6  | 23 | 23 | 54 | 39.030 | 1,2 | 44.62883 | 6.71800 | 8.270  | 295 | 77 | 170 D  |
| 2005 | 7  | 6  | 17 | 40 | 10.200 | 2,4 | 44.30433 | 6.72917 | 11.480 | 326 | 90 | 171 D  |
| 2005 | 7  | 10 | 8  | 29 | 17.370 | 1   | 44.30950 | 6.73267 | 13.570 | 321 | 54 | 157 D  |
| 2005 | 7  | 10 | 18 | 44 | 20.770 | 2,5 | 46.85017 | 8.98467 | 6.860  | 256 | 88 | -147 D |
| 2005 | 7  | 10 | 20 | 53 | 10.820 | 1,6 | 44.35000 | 6.73017 | 12.900 | 157 | 83 | 159 D  |
| 2005 | 7  | 28 | 18 | 39 | 55.290 | 2,3 | 45.71217 | 7.05217 | 8.890  | 12  | 83 | -179 D |
| 2005 | 8  | 4  | 14 | 27 | 50.190 | 1,9 | 44.96500 | 6.66550 | 8.970  | 220 | 86 | -97 D  |
| 2005 | 8  | 7  | 11 | 52 | 5.930  | 1,3 | 45.55483 | 6.22517 | 10.760 | 256 | 72 | 163 D  |
| 2005 | 8  | 27 | 15 | 48 | 38.000 | 1,6 | 44.70250 | 7.65433 | 27.880 | 51  | 58 | -108 D |

|      |    |    |    |    |        |     |          |         |        |     |    |        |
|------|----|----|----|----|--------|-----|----------|---------|--------|-----|----|--------|
| 2005 | 9  | 3  | 19 | 32 | 12.400 | 1,1 | 46.03550 | 6.91600 | 9.680  | 60  | 88 | 167 D  |
| 2005 | 9  | 3  | 19 | 33 | 8.110  | 1,5 | 46.03367 | 6.92350 | 9.090  | 233 | 82 | -133 D |
| 2005 | 9  | 4  | 18 | 35 | 20.280 | 0,9 | 45.79133 | 7.02850 | 11.070 | 16  | 89 | -163 D |
| 2005 | 9  | 5  | 9  | 28 | 7.530  | 1,4 | 46.07550 | 6.85450 | 10.550 | 124 | 57 | -83 D  |
| 2005 | 9  | 5  | 10 | 20 | 14.650 | 1,7 | 44.59617 | 6.89417 | 8.590  | 70  | 86 | 160 D  |
| 2005 | 9  | 8  | 11 | 27 | 17.230 | 4,6 | 46.04767 | 6.89567 | 8.090  | 62  | 81 | -172 A |
| 2005 | 9  | 8  | 11 | 53 | 10.020 | 2,8 | 46.03517 | 6.92233 | 7.760  | 55  | 78 | -154 D |
| 2005 | 9  | 8  | 14 | 10 | 1.710  | 2,7 | 46.03483 | 6.92217 | 9.170  | 234 | 74 | 155 D  |
| 2005 | 9  | 8  | 16 | 50 | 6.570  | 2   | 46.03417 | 6.92500 | 9.180  | 55  | 48 | -165 D |
| 2005 | 9  | 9  | 12 | 45 | 17.190 | 2,7 | 45.01383 | 6.65533 | 10.300 | 302 | 51 | -160 D |
| 2005 | 9  | 10 | 12 | 33 | 19.710 | 2,4 | 44.60283 | 6.90733 | 8.100  | 85  | 64 | 153 D  |
| 2005 | 9  | 10 | 13 | 25 | 28.430 | 3   | 44.60100 | 6.91050 | 8.090  | 264 | 78 | 161 D  |
| 2005 | 9  | 10 | 13 | 32 | 39.980 | 1,7 | 44.59600 | 6.88850 | 9.720  | 80  | 88 | -169 D |
| 2005 | 9  | 10 | 16 | 30 | 44.060 | 1,8 | 44.59533 | 6.88850 | 9.450  | 198 | 81 | -143 D |
| 2005 | 9  | 10 | 18 | 19 | 25.360 | 1,1 | 44.59517 | 6.88633 | 8.730  | 178 | 80 | -133 D |
| 2005 | 9  | 12 | 7  | 3  | 29.830 | 1,6 | 44.59633 | 6.89633 | 9.700  | 104 | 88 | 141 D  |
| 2005 | 9  | 13 | 12 | 40 | 17.440 | 1,4 | 44.59450 | 6.88883 | 9.650  | 79  | 73 | -146 D |
| 2005 | 9  | 16 | 0  | 44 | 41.940 | 1   | 46.04683 | 6.90467 | 8.570  | 56  | 81 | 164 D  |
| 2005 | 9  | 18 | 21 | 54 | 24.580 | 2,1 | 46.04767 | 6.90650 | 9.360  | 56  | 82 | 154 D  |
| 2005 | 10 | 1  | 23 | 19 | 33.030 | 2,8 | 45.04417 | 5.77950 | 7.320  | 70  | 71 | -178 C |
| 2005 | 10 | 4  | 6  | 8  | 16.240 | 2,1 | 44.13833 | 7.25983 | 11.450 | 342 | 50 | -130 D |
| 2005 | 10 | 4  | 13 | 37 | 14.680 | 2,6 | 44.42617 | 7.29650 | 14.800 | 353 | 85 | -162 D |
| 2005 | 10 | 4  | 19 | 54 | 29.160 | 1,8 | 46.35400 | 6.30567 | 1.290  | 106 | 57 | -165 D |
| 2005 | 10 | 5  | 19 | 55 | 3.540  | 1,5 | 46.05483 | 6.90400 | 9.120  | 63  | 82 | -177 D |
| 2005 | 10 | 6  | 1  | 37 | 13.630 | 1,2 | 46.04667 | 6.90383 | 9.270  | 76  | 86 | -178 D |
| 2005 | 10 | 6  | 21 | 39 | 40.760 | 0,2 | 46.05317 | 6.90350 | 9.090  | 247 | 63 | -161 D |
| 2005 | 10 | 6  | 22 | 17 | 29.440 | 1,6 | 44.47217 | 6.99350 | 9.660  | 327 | 68 | -136 D |
| 2005 | 10 | 7  | 5  | 32 | 40.860 | 1,4 | 46.04783 | 6.90400 | 9.080  | 250 | 85 | 145 D  |
| 2005 | 10 | 7  | 14 | 49 | 20.880 | 1,8 | 46.03283 | 6.91383 | 8.990  | 235 | 80 | 171 D  |
| 2005 | 10 | 8  | 23 | 13 | 5.190  | 1,9 | 44.59517 | 6.89767 | 8.680  | 129 | 88 | -150 D |
| 2005 | 10 | 8  | 23 | 22 | 55.210 | 1,8 | 44.59566 | 6.90733 | 8.200  | 81  | 60 | 148 D  |
| 2005 | 10 | 9  | 0  | 5  | 39.840 | 2   | 44.59566 | 6.90850 | 6.770  | 79  | 80 | 175 D  |
| 2005 | 10 | 9  | 1  | 26 | 5.260  | 2,2 | 44.59517 | 6.90667 | 8.230  | 105 | 38 | -157 D |
| 2005 | 10 | 9  | 4  | 59 | 47.310 | 1,6 | 44.62150 | 6.69550 | 10.870 | 347 | 87 | 150 D  |
| 2005 | 10 | 9  | 9  | 23 | 36.620 | 2,5 | 44.60050 | 6.91683 | 7.340  | 307 | 88 | 141 D  |
| 2005 | 10 | 9  | 9  | 26 | 43.300 | 1,8 | 44.60117 | 6.90917 | 8.190  | 336 | 30 | -139 D |
| 2005 | 10 | 9  | 23 | 32 | 18.380 | 1,5 | 44.59500 | 6.87933 | 9.500  | 336 | 62 | -110 D |
| 2005 | 10 | 11 | 1  | 57 | 8.780  | 1   | 44.61383 | 6.67717 | 10.800 | 174 | 80 | -175 D |
| 2005 | 10 | 11 | 21 | 31 | 30.040 | 1,3 | 44.61317 | 6.69017 | 11.940 | 76  | 49 | -76 D  |
| 2005 | 10 | 13 | 11 | 1  | 12.130 | 1   | 46.05300 | 6.90200 | 9.790  | 236 | 88 | -178 D |
| 2005 | 10 | 15 | 7  | 10 | 50.710 | 2,4 | 44.62100 | 6.70767 | 9.990  | 174 | 82 | -103 D |
| 2005 | 10 | 16 | 6  | 49 | 1.320  | 2,3 | 44.62083 | 6.70800 | 11.480 | 232 | 60 | -116 D |
| 2005 | 10 | 17 | 7  | 45 | 32.870 | 0,8 | 44.61350 | 6.67017 | 9.360  | 342 | 90 | 165 D  |
| 2005 | 10 | 18 | 4  | 14 | 14.200 | 1,5 | 46.04367 | 6.91433 | 9.740  | 272 | 49 | -106 D |
| 2005 | 10 | 19 | 1  | 15 | 2.820  | 2   | 46.03483 | 6.91583 | 10.520 | 249 | 89 | 141 D  |
| 2005 | 10 | 21 | 5  | 14 | 30.820 | 1,1 | 44.61567 | 6.67850 | 10.240 | 204 | 42 | -104 D |
| 2005 | 10 | 25 | 21 | 17 | 51.840 | 2,2 | 44.47367 | 7.30550 | 14.070 | 178 | 54 | -152 D |
| 2005 | 10 | 26 | 1  | 5  | 16.270 | 0,9 | 44.61433 | 6.67300 | 10.130 | 143 | 82 | -151 D |
| 2005 | 10 | 26 | 2  | 17 | 26.200 | 2,2 | 44.62700 | 6.72533 | 10.190 | 53  | 20 | -74 D  |
| 2005 | 10 | 30 | 2  | 4  | 14.940 | 1,2 | 46.03950 | 6.91417 | 9.900  | 46  | 90 | 136 D  |
| 2005 | 10 | 31 | 3  | 39 | 58.210 | 3,2 | 45.69850 | 6.37633 | 7.570  | 11  | 35 | 87 B   |
| 2005 | 10 | 31 | 11 | 57 | 54.190 | 1,3 | 46.03550 | 6.92217 | 10.650 | 228 | 77 | 144 D  |
| 2005 | 11 | 4  | 2  | 0  | 25.680 | 1,7 | 45.04633 | 6.60767 | 11.910 | 131 | 89 | 171 D  |



|      |    |    |    |    |        |     |          |         |        |     |    |        |
|------|----|----|----|----|--------|-----|----------|---------|--------|-----|----|--------|
| 2005 | 11 | 5  | 15 | 17 | 52.790 | 2,5 | 45.69467 | 6.38733 | 12.200 | 29  | 84 | -178 D |
| 2005 | 11 | 7  | 7  | 14 | 27.190 | 1,9 | 46.11750 | 8.02250 | 12.730 | 327 | 64 | -115 D |
| 2005 | 11 | 7  | 20 | 42 | 37.980 | 1,3 | 46.03550 | 6.91517 | 9.850  | 278 | 48 | -115 D |
| 2005 | 11 | 8  | 6  | 13 | 13.470 | 1,2 | 44.62083 | 6.68050 | 11.450 | 199 | 48 | -102 D |
| 2005 | 11 | 8  | 19 | 24 | 29.190 | 1,3 | 44.61967 | 6.68883 | 11.120 | 189 | 87 | -149 D |
| 2005 | 11 | 19 | 6  | 42 | 46.790 | 1,4 | 46.03467 | 6.91300 | 9.260  | 247 | 81 | 156 D  |
| 2005 | 11 | 20 | 10 | 49 | 0.010  | 3,3 | 45.41767 | 9.00917 | 39.450 | 260 | 72 | -101 D |
| 2005 | 11 | 24 | 22 | 32 | 40.690 | 1,2 | 46.03417 | 6.91200 | 10.000 | 67  | 90 | -171 D |
| 2005 | 11 | 25 | 2  | 20 | 23.250 | 1,7 | 44.81017 | 6.61150 | 9.460  | 33  | 63 | 156 D  |
| 2005 | 11 | 25 | 22 | 34 | 50.730 | 2,2 | 43.99933 | 6.79167 | 7.820  | 315 | 75 | -115 D |
| 2005 | 11 | 26 | 23 | 20 | 0.600  | 1,5 | 44.47200 | 6.95583 | 9.570  | 111 | 53 | -116 D |
| 2005 | 11 | 28 | 11 | 26 | 4.120  | 1,9 | 46.02800 | 6.90733 | 9.260  | 54  | 85 | -175 D |
| 2005 | 12 | 19 | 17 | 34 | 29.710 | 1,5 | 44.61717 | 7.20983 | 14.360 | 174 | 75 | -171 D |
| 2005 | 12 | 20 | 23 | 57 | 33.740 | 3,3 | 44.12250 | 6.96817 | 3.610  | 59  | 40 | 136 D  |
| 2005 | 12 | 24 | 23 | 55 | 46.650 | 0,9 | 44.75517 | 6.67850 | 8.920  | 108 | 53 | 128 D  |
| 2005 | 12 | 26 | 2  | 44 | 39.600 | 1,7 | 45.73850 | 5.68733 | 12.190 | 241 | 42 | 134 D  |
| 2005 | 12 | 27 | 3  | 16 | 51.320 | 1,6 | 45.69267 | 6.37583 | 11.960 | 74  | 70 | 165 D  |
| 2006 | 1  | 1  | 17 | 55 | 51.470 | 2   | 45.68733 | 6.37800 | 13.430 | 64  | 49 | 173 D  |
| 2006 | 1  | 11 | 15 | 11 | 59.080 | 2,5 | 45.16867 | 7.11183 | 13.830 | 358 | 87 | -157 D |
| 2006 | 1  | 14 | 8  | 53 | 56.750 | 1,6 | 45.16867 | 7.08550 | 13.940 | 342 | 73 | 176 D  |
| 2006 | 1  | 20 | 20 | 52 | 58.830 | 1,8 | 44.42567 | 6.82283 | 11.060 | 140 | 84 | 176 D  |
| 2006 | 1  | 23 | 10 | 29 | 1.400  | 1,9 | 44.16183 | 6.75983 | 11.850 | 338 | 63 | 160 D  |
| 2006 | 1  | 25 | 1  | 40 | 18.980 | 2,2 | 44.42433 | 6.83400 | 8.070  | 122 | 83 | 140 D  |
| 2006 | 2  | 1  | 4  | 48 | 20.000 | 1,2 | 44.99583 | 6.53317 | 9.760  | 244 | 53 | -93 D  |
| 2006 | 2  | 2  | 3  | 1  | 9.350  | 1,5 | 44.43233 | 7.21933 | 16.760 | 157 | 37 | -101 D |
| 2006 | 2  | 4  | 7  | 32 | 51.670 | 1,9 | 44.04933 | 7.29700 | 8.030  | 45  | 37 | -100 D |
| 2006 | 2  | 4  | 11 | 58 | 11.550 | 1,9 | 45.69250 | 6.38533 | 11.240 | 147 | 53 | 115 D  |
| 2006 | 2  | 10 | 3  | 10 | 24.470 | 1,8 | 45.08967 | 7.32467 | 17.350 | 126 | 48 | 116 D  |
| 2006 | 2  | 21 | 4  | 43 | 10.720 | 1,5 | 44.78500 | 6.75467 | 10.360 | 253 | 73 | 172 D  |
| 2006 | 2  | 26 | 1  | 19 | 59.050 | 1,3 | 46.03450 | 6.90350 | 9.730  | 226 | 89 | -172 D |
| 2006 | 2  | 28 | 2  | 56 | 33.080 | 2,2 | 44.46583 | 7.24967 | 15.650 | 167 | 44 | -79 D  |
| 2006 | 3  | 6  | 4  | 31 | 59.200 | 1,6 | 44.86550 | 6.73250 | 9.470  | 269 | 71 | -161 D |
| 2006 | 3  | 7  | 0  | 56 | 53.680 | 2,1 | 44.23583 | 6.72233 | 7.680  | 159 | 87 | 119 D  |
| 2006 | 3  | 18 | 22 | 49 | 32.130 | 2,4 | 46.22483 | 7.49750 | 7.980  | 320 | 59 | -87 D  |
| 2006 | 3  | 19 | 9  | 44 | 0.110  | 1,9 | 44.05300 | 7.01583 | 12.280 | 293 | 43 | -171 D |
| 2006 | 3  | 25 | 21 | 42 | 14.530 | 2,2 | 46.51383 | 8.81733 | 7.100  | 22  | 53 | 120 D  |
| 2006 | 4  | 1  | 21 | 33 | 39.540 | 1,4 | 44.63517 | 6.90967 | 8.890  | 154 | 88 | 142 D  |
| 2006 | 4  | 22 | 0  | 47 | 17.830 | 1,6 | 44.95233 | 6.62667 | 9.110  | 0   | 84 | 176 D  |
| 2006 | 4  | 23 | 7  | 57 | 14.070 | 1,6 | 44.47450 | 7.24533 | 15.630 | 312 | 73 | 151 D  |
| 2006 | 4  | 27 | 19 | 51 | 43.740 | 2,3 | 44.53950 | 6.82467 | 6.430  | 352 | 49 | -101 D |
| 2006 | 4  | 28 | 5  | 24 | 50.470 | 2   | 44.53450 | 6.81300 | 7.220  | 11  | 40 | -122 D |
| 2006 | 5  | 4  | 7  | 48 | 20.170 | 1,9 | 44.33383 | 6.43200 | 9.040  | 22  | 72 | -130 D |
| 2006 | 5  | 8  | 16 | 7  | 34.070 | 2   | 45.13367 | 5.87017 | 8.950  | 28  | 77 | 129 D  |
| 2006 | 5  | 9  | 0  | 23 | 31.310 | 1,9 | 45.28583 | 6.82300 | 7.510  | 191 | 69 | 93 D   |
| 2006 | 5  | 18 | 20 | 39 | 11.430 | 2,3 | 45.01350 | 6.92367 | 8.900  | 256 | 48 | -91 D  |
| 2006 | 5  | 19 | 18 | 7  | 18.900 | 2,2 | 45.01400 | 6.91417 | 9.940  | 11  | 34 | -140 D |
| 2006 | 6  | 12 | 0  | 5  | 42.710 | 2,3 | 46.63117 | 9.60667 | 10.130 | 215 | 89 | 90 D   |
| 2006 | 6  | 12 | 20 | 39 | 18.740 | 1,3 | 44.71567 | 6.83183 | 11.280 | 247 | 89 | -141 D |
| 2006 | 6  | 16 | 4  | 8  | 44.580 | 1,3 | 45.10000 | 6.51350 | 10.580 | 195 | 68 | -169 D |
| 2006 | 6  | 19 | 1  | 28 | 5.140  | 1,6 | 46.84017 | 8.68850 | 10.950 | 222 | 84 | 176 D  |
| 2006 | 6  | 21 | 19 | 53 | 42.510 | 1,9 | 45.77550 | 6.64817 | 9.900  | 87  | 79 | -145 D |
| 2006 | 6  | 22 | 16 | 6  | 25.930 | 2,1 | 46.31983 | 7.29133 | 8.020  | 95  | 89 | 174 D  |
| 2006 | 6  | 26 | 21 | 50 | 53.200 | 1,7 | 44.26266 | 6.65800 | 7.600  | 1   | 74 | -178 D |

|      |    |    |    |    |        |     |          |         |        |     |    |        |
|------|----|----|----|----|--------|-----|----------|---------|--------|-----|----|--------|
| 2006 | 6  | 30 | 0  | 34 | 44.830 | 2,2 | 45.69983 | 6.38467 | 9.220  | 75  | 49 | -172 D |
| 2006 | 7  | 4  | 13 | 52 | 39.780 | 2,1 | 46.28700 | 8.70567 | 12.470 | 243 | 78 | 150 D  |
| 2006 | 7  | 11 | 11 | 29 | 49.090 | 2   | 46.11167 | 6.38983 | 7.890  | 69  | 69 | 124 D  |
| 2006 | 7  | 17 | 3  | 6  | 33.680 | 1,7 | 46.56917 | 7.71250 | 11.210 | 280 | 68 | -150 D |
| 2006 | 8  | 7  | 0  | 39 | 31.680 | 2,4 | 44.58750 | 7.21117 | 10.920 | 309 | 89 | -166 D |
| 2006 | 8  | 8  | 13 | 12 | 22.770 | 2,3 | 44.95267 | 6.63833 | 8.390  | 159 | 28 | 37 D   |
| 2006 | 8  | 16 | 15 | 5  | 19.700 | 2,5 | 46.09633 | 7.09850 | 9.190  | 39  | 90 | 154 D  |
| 2006 | 8  | 20 | 2  | 54 | 15.720 | 1,3 | 44.42600 | 6.29500 | 7.440  | 138 | 77 | -172 D |
| 2006 | 9  | 2  | 1  | 21 | 30.280 | 4,1 | 43.93217 | 7.66417 | 10.850 | 108 | 84 | -168 D |
| 2006 | 9  | 10 | 3  | 8  | 5.600  | 1,9 | 44.18150 | 6.94883 | 11.750 | 311 | 79 | 178 D  |
| 2006 | 9  | 11 | 15 | 4  | 12.380 | 3,1 | 44.63167 | 7.78833 | 57.640 | 85  | 83 | 144 D  |
| 2006 | 9  | 13 | 13 | 47 | 25.340 | 2,2 | 44.70984 | 6.86950 | 9.860  | 33  | 85 | -177 D |
| 2006 | 9  | 21 | 6  | 57 | 32.250 | 1,9 | 44.55450 | 6.82217 | 8.670  | 234 | 64 | -77 D  |
| 2006 | 9  | 21 | 11 | 35 | 42.290 | 1,8 | 44.51500 | 7.37117 | 18.090 | 148 | 57 | -111 D |
| 2006 | 9  | 23 | 1  | 41 | 32.630 | 2,3 | 44.55950 | 6.83333 | 8.580  | 177 | 34 | -89 C  |
| 2006 | 10 | 7  | 7  | 48 | 48.130 | 1,8 | 46.07400 | 6.85567 | 11.230 | 243 | 84 | 133 D  |
| 2006 | 10 | 13 | 3  | 8  | 48.600 | 1,5 | 45.08700 | 6.67467 | 11.140 | 46  | 56 | -144 D |
| 2006 | 10 | 15 | 2  | 44 | 51.040 | 1   | 45.02567 | 6.57767 | 12.760 | 17  | 85 | -96 D  |
| 2006 | 10 | 22 | 18 | 30 | 42.870 | 1,8 | 44.95400 | 7.38217 | 19.130 | 223 | 28 | -110 D |
| 2006 | 10 | 24 | 17 | 31 | 48.090 | 3,5 | 43.94017 | 7.66967 | 11.600 | 276 | 90 | 142 D  |
| 2006 | 10 | 24 | 20 | 5  | 28.650 | 2,8 | 46.75367 | 9.87650 | 10.060 | 344 | 23 | -76 D  |
| 2006 | 10 | 24 | 20 | 11 | 4.400  | 2,4 | 46.75417 | 9.87867 | 9.800  | 157 | 55 | -83 D  |
| 2006 | 10 | 25 | 3  | 58 | 24.990 | 2,4 | 46.76067 | 9.87800 | 10.580 | 6   | 36 | -132 D |
| 2006 | 10 | 31 | 3  | 8  | 6.570  | 2,8 | 46.74800 | 9.87733 | 9.090  | 348 | 25 | -114 D |
| 2006 | 10 | 31 | 20 | 10 | 28.600 | 1,9 | 44.67050 | 7.20817 | 12.790 | 301 | 44 | 173 D  |
| 2006 | 10 | 31 | 20 | 11 | 8.370  | 2,4 | 44.67583 | 7.22783 | 11.990 | 182 | 63 | -88 D  |
| 2006 | 11 | 1  | 17 | 43 | 8.510  | 1,4 | 44.23717 | 6.89150 | 13.600 | 121 | 86 | -126 D |
| 2006 | 11 | 11 | 10 | 37 | 52.180 | 1,9 | 44.52083 | 7.23000 | 13.380 | 209 | 52 | -98 D  |
| 2006 | 11 | 14 | 18 | 59 | 34.940 | 1,6 | 45.46267 | 6.13783 | 12.350 | 210 | 42 | 130 D  |
| 2006 | 11 | 14 | 20 | 5  | 42.800 | 1,7 | 46.31833 | 7.40867 | 8.170  | 115 | 62 | -134 D |
| 2006 | 11 | 22 | 15 | 54 | 31.720 | 2,6 | 45.84367 | 6.73000 | 12.970 | 62  | 83 | -152 D |
| 2006 | 11 | 24 | 21 | 30 | 59.800 | 2,2 | 46.06783 | 8.00800 | 12.780 | 273 | 49 | -107 C |
| 2006 | 11 | 30 | 19 | 55 | 47.090 | 1,3 | 44.50250 | 6.87850 | 9.560  | 315 | 83 | 161 D  |
| 2006 | 12 | 19 | 9  | 14 | 21.440 | 2,2 | 44.18900 | 6.97433 | 11.910 | 308 | 88 | 175 D  |
| 2006 | 12 | 24 | 11 | 52 | 35.830 | 1,6 | 45.01133 | 6.37183 | 9.520  | 275 | 84 | 178 D  |
| 2006 | 12 | 28 | 17 | 16 | 10.750 | 1,6 | 46.31350 | 7.28917 | 7.400  | 279 | 86 | 155 D  |
| 2006 | 12 | 30 | 19 | 11 | 35.280 | 2   | 45.27533 | 5.36817 | 10.240 | 58  | 87 | -168 D |
| 2006 | 12 | 31 | 17 | 59 | 11.920 | 1,3 | 44.70300 | 6.86167 | 11.400 | 2   | 73 | -149 D |
| 2007 | 1  | 3  | 13 | 14 | 18.030 | 2,9 | 45.42583 | 6.63867 | 11.310 | 188 | 87 | -137 D |
| 2007 | 1  | 3  | 14 | 20 | 22.990 | 2,2 | 46.23167 | 7.75117 | 12.440 | 318 | 42 | -66 C  |
| 2007 | 1  | 17 | 11 | 19 | 35.650 | 1,1 | 44.75150 | 6.81817 | 14.090 | 167 | 62 | -138 D |
| 2007 | 2  | 7  | 6  | 44 | 59.250 | 1,6 | 44.53433 | 6.81367 | 8.770  | 328 | 67 | -112 D |
| 2007 | 2  | 25 | 14 | 9  | 2.990  | 1,6 | 44.41933 | 7.04167 | 11.720 | 251 | 29 | 166 D  |
| 2007 | 3  | 6  | 9  | 34 | 46.780 | 2,1 | 44.54750 | 7.04933 | 11.780 | 298 | 48 | 159 D  |
| 2007 | 3  | 9  | 23 | 26 | 16.080 | 1,5 | 45.34317 | 6.56683 | 10.320 | 54  | 26 | -148 D |
| 2007 | 3  | 10 | 1  | 6  | 2.710  | 1,9 | 45.34833 | 6.56483 | 10.570 | 16  | 40 | -135 D |
| 2007 | 3  | 13 | 20 | 28 | 17.840 | 1,4 | 44.40500 | 6.89050 | 14.450 | 161 | 74 | 176 D  |
| 2007 | 3  | 17 | 16 | 11 | 51.420 | 1,3 | 44.37317 | 7.38950 | 15.360 | 297 | 75 | -126 D |
| 2007 | 3  | 18 | 2  | 48 | 47.310 | 1,2 | 44.57583 | 7.26550 | 16.200 | 141 | 87 | -126 D |
| 2007 | 3  | 23 | 5  | 1  | 38.630 | 3,2 | 45.71383 | 9.86983 | 12.870 | 251 | 80 | 102 D  |
| 2007 | 3  | 24 | 10 | 5  | 17.980 | 0,8 | 46.04167 | 6.90567 | 9.600  | 60  | 81 | 165 D  |
| 2007 | 3  | 25 | 19 | 34 | 7.550  | 2   | 44.12900 | 6.98800 | 11.220 | 324 | 74 | 102 D  |
| 2007 | 3  | 26 | 3  | 21 | 8.790  | 1,5 | 44.83417 | 6.41217 | 8.530  | 26  | 60 | -87 D  |

|      |    |    |    |    |        |     |          |         |        |     |    |        |
|------|----|----|----|----|--------|-----|----------|---------|--------|-----|----|--------|
| 2007 | 3  | 26 | 3  | 44 | 3.410  | 2   | 44.85250 | 7.28783 | 10.790 | 249 | 86 | 120 D  |
| 2007 | 3  | 31 | 17 | 27 | 22.640 | 2   | 45.12550 | 5.42383 | 7.830  | 247 | 82 | -163 D |
| 2007 | 4  | 5  | 20 | 13 | 46.040 | 2,3 | 45.26367 | 6.68900 | 7.610  | 128 | 50 | 138 D  |
| 2007 | 4  | 6  | 16 | 11 | 35.300 | 1,4 | 44.28750 | 6.56967 | 12.940 | 301 | 86 | -159 D |
| 2007 | 4  | 9  | 11 | 14 | 38.220 | 1,8 | 44.34033 | 7.27383 | 13.880 | 333 | 81 | 142 D  |
| 2007 | 4  | 16 | 1  | 1  | 4.510  | 2   | 44.25167 | 8.66067 | 14.330 | 207 | 89 | -120 D |
| 2007 | 4  | 23 | 16 | 52 | 49.390 | 2,5 | 44.52183 | 6.88900 | 12.300 | 170 | 84 | -149 D |
| 2007 | 4  | 23 | 18 | 14 | 36.040 | 1,2 | 44.52083 | 6.88100 | 12.690 | 147 | 85 | -155 D |
| 2007 | 4  | 29 | 6  | 50 | 5.010  | 2   | 46.12850 | 6.73683 | 9.510  | 102 | 88 | -170 D |
| 2007 | 5  | 1  | 20 | 44 | 42.840 | 1,4 | 44.73583 | 6.80933 | 11.280 | 231 | 73 | -164 D |
| 2007 | 5  | 8  | 20 | 18 | 3.630  | 1,7 | 44.48083 | 7.11583 | 10.920 | 349 | 70 | -123 D |
| 2007 | 5  | 21 | 23 | 26 | 21.240 | 1,5 | 44.82650 | 6.43750 | 11.800 | 229 | 39 | -91 D  |
| 2007 | 6  | 4  | 9  | 39 | 55.890 | 1,6 | 44.82800 | 6.43967 | 12.470 | 216 | 50 | -85 D  |
| 2007 | 6  | 5  | 10 | 11 | 34.770 | 3,1 | 44.42033 | 7.29217 | 15.410 | 356 | 44 | -103 D |
| 2007 | 6  | 16 | 18 | 17 | 14.640 | 2,4 | 45.40967 | 6.58250 | 9.000  | 278 | 43 | -128 D |
| 2007 | 6  | 28 | 1  | 19 | 40.110 | 1,1 | 44.98417 | 6.62700 | 10.910 | 7   | 89 | 162 D  |
| 2007 | 7  | 9  | 18 | 12 | 31.580 | 2   | 45.06000 | 6.54933 | 10.950 | 303 | 86 | -160 D |
| 2007 | 7  | 9  | 18 | 27 | 23.420 | 1,7 | 45.05950 | 6.55817 | 14.100 | 340 | 83 | -152 D |
| 2007 | 7  | 9  | 22 | 24 | 2.510  | 2,3 | 45.54900 | 5.61950 | 11.500 | 57  | 86 | 144 D  |
| 2007 | 7  | 12 | 0  | 9  | 32.400 | 2,8 | 46.94617 | 8.77950 | 6.000  | 245 | 69 | 178 D  |
| 2007 | 7  | 24 | 12 | -1 | 57.560 | 1,5 | 44.22817 | 6.52250 | 11.150 | 316 | 69 | 170 D  |
| 2007 | 7  | 25 | 10 | 31 | 7.170  | 2   | 45.14567 | 7.37800 | 14.980 | 355 | 87 | -160 D |
| 2007 | 8  | 7  | 5  | 5  | 9.540  | 2,1 | 46.02800 | 6.89483 | 9.270  | 250 | 84 | 151 D  |
| 2007 | 8  | 11 | 12 | 40 | 35.500 | 2,2 | 44.54283 | 7.24817 | 14.040 | 209 | 48 | -105 D |
| 2007 | 8  | 20 | 13 | 54 | 38.680 | 2,1 | 44.63150 | 7.04550 | 13.340 | 338 | 43 | 177 D  |
| 2007 | 8  | 20 | 14 | 12 | 7.990  | 1,7 | 44.62983 | 7.03883 | 14.080 | 355 | 56 | -102 D |
| 2007 | 8  | 20 | 14 | 20 | 37.170 | 1,8 | 44.62950 | 7.03967 | 14.180 | 132 | 86 | 127 D  |
| 2007 | 8  | 20 | 17 | 12 | 50.470 | 3,1 | 44.62933 | 7.04783 | 11.220 | 193 | 58 | -88 D  |
| 2007 | 8  | 20 | 17 | 23 | 40.320 | 1,8 | 44.63000 | 7.03150 | 14.130 | 146 | 64 | -94 D  |
| 2007 | 8  | 20 | 17 | 24 | 41.870 | 2,1 | 44.62950 | 7.03567 | 13.190 | 342 | 34 | -77 D  |
| 2007 | 8  | 20 | 18 | 0  | 16.010 | 1,8 | 44.63483 | 7.03817 | 14.850 | 319 | 83 | -138 D |
| 2007 | 8  | 20 | 20 | 3  | 37.320 | 1,9 | 44.63483 | 7.03883 | 13.470 | 309 | 78 | -140 D |
| 2007 | 8  | 23 | 21 | 34 | 59.740 | 2,4 | 46.77417 | 9.45583 | 7.750  | 252 | 82 | 161 D  |
| 2007 | 8  | 27 | 12 | 15 | 0.440  | 1,5 | 44.23300 | 6.62817 | 11.910 | 93  | 36 | -88 D  |
| 2007 | 8  | 28 | 15 | 57 | 42.010 | 2,1 | 45.16067 | 6.56783 | 11.730 | 24  | 22 | -173 D |
| 2007 | 8  | 31 | 16 | 21 | 14.760 | 2,4 | 44.31867 | 7.02233 | 9.820  | 147 | 43 | -92 D  |
| 2007 | 9  | 7  | 13 | 9  | 15.530 | 1,6 | 44.93400 | 7.28167 | 15.840 | 191 | 74 | 159 D  |
| 2007 | 9  | 13 | 17 | 31 | 53.030 | 1,1 | 46.03633 | 6.89467 | 9.360  | 61  | 82 | -137 D |
| 2007 | 9  | 15 | 23 | 15 | 6.660  | 1,4 | 45.52583 | 6.66850 | 11.670 | 273 | 77 | -160 D |
| 2007 | 10 | 4  | 15 | 17 | 25.400 | 2,3 | 46.27817 | 7.97583 | 10.250 | 53  | 83 | -145 D |
| 2007 | 10 | 5  | 6  | 5  | 21.470 | 3,3 | 45.02800 | 6.55933 | 8.190  | 294 | 10 | 168 C  |
| 2007 | 10 | 5  | 12 | 33 | 27.740 | 1,7 | 45.66550 | 6.20217 | 10.450 | 218 | 21 | -147 D |
| 2007 | 10 | 7  | 14 | 39 | 14.410 | 2,2 | 44.46667 | 7.27867 | 15.670 | 9   | 32 | -76 D  |
| 2007 | 10 | 8  | 15 | 51 | 30.240 | 1,6 | 44.62917 | 7.12683 | 14.180 | 113 | 73 | -146 D |
| 2007 | 10 | 8  | 23 | 18 | 46.030 | 1,7 | 44.62750 | 6.72617 | 10.410 | 40  | 14 | -79 D  |
| 2007 | 10 | 13 | 5  | 44 | 17.360 | 1,9 | 46.07617 | 7.30350 | 11.210 | 166 | 86 | 133 D  |
| 2007 | 10 | 24 | 22 | 43 | 37.130 | 3,2 | 45.01534 | 7.34933 | 14.600 | 267 | 30 | -97 C  |
| 2007 | 10 | 24 | 22 | 43 | 37.130 | 3,2 | 45.01534 | 7.34933 | 14.600 | 202 | 34 | -108 D |
| 2007 | 10 | 25 | 7  | 15 | 19.410 | 2,6 | 44.47433 | 7.27667 | 14.890 | 253 | 34 | -86 D  |
| 2007 | 10 | 31 | 6  | 7  | 16.500 | 2,2 | 46.33233 | 7.36817 | 8.900  | 130 | 33 | -85 D  |
| 2007 | 11 | 3  | 11 | 39 | 49.220 | 1,1 | 46.07800 | 7.44783 | 10.760 | 292 | 52 | -81 D  |
| 2007 | 11 | 3  | 23 | 39 | 4.880  | 2,2 | 44.36633 | 7.29617 | 15.330 | 124 | 78 | -136 D |
| 2007 | 11 | 6  | 1  | 18 | 10.280 | 1,8 | 44.39917 | 7.31733 | 14.870 | 355 | 81 | -146 D |

\*  
\*

|      |    |    |    |    |        |     |          |          |        |     |    |        |
|------|----|----|----|----|--------|-----|----------|----------|--------|-----|----|--------|
| 2007 | 11 | 9  | 3  | 14 | 49.580 | 2,8 | 44.38766 | 7.33117  | 14.870 | 132 | 43 | 121 D  |
| 2007 | 11 | 13 | 20 | 13 | 26.670 | 2,4 | 44.38433 | 7.26783  | 13.850 | 345 | 44 | -94 D  |
| 2007 | 11 | 25 | 13 | 57 | 11.460 | 0,9 | 46.04233 | 6.92083  | 9.720  | 235 | 83 | 170 D  |
| 2007 | 12 | 12 | 22 | 14 | 51.150 | 2,1 | 46.14283 | 6.62150  | 10.810 | 327 | 90 | -98 D  |
| 2007 | 12 | 13 | 12 | 18 | 35.930 | 1,5 | 44.56683 | 6.89783  | 11.200 | 172 | 87 | -127 D |
| 2007 | 12 | 14 | 2  | 14 | 41.410 | 1,5 | 45.93317 | 6.94233  | 9.390  | 211 | 79 | -132 D |
| 2007 | 12 | 14 | 8  | 43 | 45.730 | 2   | 45.24434 | 7.67950  | 25.910 | 132 | 84 | -108 D |
| 2008 | 1  | 5  | 3  | 8  | 21.060 | 2,2 | 45.64067 | 5.11267  | 13.970 | 97  | 49 | -161 D |
| 2008 | 1  | 5  | 23 | 39 | 16.020 | 1,4 | 46.31816 | 7.57150  | 11.190 | 271 | 63 | -131 D |
| 2008 | 1  | 11 | 0  | 10 | 24.450 | 2,3 | 44.40650 | 7.30350  | 15.410 | 165 | 53 | -78 D  |
| 2008 | 1  | 16 | 10 | 7  | 7.480  | 1,6 | 46.28750 | 7.47600  | 11.170 | 93  | 86 | -163 D |
| 2008 | 1  | 21 | 16 | 40 | 35.020 | 3,8 | 46.76950 | 9.47267  | 12.070 | 259 | 84 | 167 D  |
| 2008 | 1  | 28 | 23 | 59 | 3.290  | 1,8 | 46.08450 | 6.45433  | 9.390  | 51  | 86 | -176 D |
| 2008 | 2  | 2  | 20 | 40 | 31.250 | 1,7 | 46.19450 | 8.62550  | 21.980 | 111 | 65 | -128 D |
| 2008 | 2  | 4  | 5  | 16 | 43.690 | 1,8 | 44.80400 | 6.77217  | 9.890  | 227 | 85 | -101 D |
| 2008 | 2  | 17 | 12 | 41 | 30.760 | 3,4 | 45.92700 | 7.16700  | 8.400  | 359 | 70 | 159 C  |
| 2008 | 2  | 19 | 20 | 38 | 46.080 | 1,4 | 44.54200 | 7.25583  | 10.570 | 113 | 50 | 83 D   |
| 2008 | 2  | 20 | 4  | 5  | 5.680  | 2,8 | 43.89900 | 7.83950  | 9.060  | 265 | 84 | 112 D  |
| 2008 | 2  | 25 | 17 | 7  | 21.310 | 1,8 | 45.18750 | 5.84967  | 10.550 | 236 | 88 | -149 D |
| 2008 | 3  | 3  | 2  | 46 | 28.600 | 2   | 45.66883 | 6.20200  | 10.480 | 243 | 44 | 153 D  |
| 2008 | 3  | 9  | 5  | 52 | 57.100 | 1,6 | 45.16817 | 5.90083  | 8.650  | 21  | 88 | -177 D |
| 2008 | 4  | 17 | 1  | 7  | 36.440 | 2,8 | 46.66633 | 10.10817 | 8.220  | 334 | 23 | -100 D |
| 2008 | 4  | 17 | 21 | 42 | 4.130  | 2,4 | 46.41550 | 8.54333  | 13.080 | 55  | 83 | -147 D |
| 2008 | 4  | 18 | 7  | 38 | 11.280 | 2,4 | 44.35917 | 7.29433  | 14.040 | 159 | 56 | -93 D  |
| 2008 | 4  | 20 | 1  | 35 | 40.430 | 1,7 | 44.50117 | 7.30400  | 15.560 | 198 | 70 | 149 D  |
| 2008 | 5  | 6  | 1  | 45 | 33.550 | 2,2 | 44.42450 | 7.30467  | 15.610 | 28  | 51 | -102 D |
| 2008 | 5  | 11 | 6  | 9  | 1.700  | 1,6 | 45.62983 | 6.95383  | 11.650 | 16  | 66 | -143 D |
| 2008 | 5  | 19 | 1  | 53 | 39.390 | 2,8 | 44.32483 | 7.36167  | 14.680 | 356 | 29 | -133 D |
| 2008 | 6  | 3  | 15 | 20 | 39.500 | 2,1 | 45.64850 | 6.93683  | 9.030  | 210 | 88 | -176 D |
| 2008 | 6  | 17 | 19 | 48 | 7.430  | 2,9 | 46.32583 | 7.33250  | 8.740  | 274 | 62 | -111 C |
| 2008 | 7  | 2  | 0  | 25 | 19.990 | 2,1 | 44.82084 | 7.60567  | 24.850 | 128 | 26 | 110 D  |
| 2008 | 7  | 24 | 4  | 13 | 43.970 | 2,3 | 46.04100 | 6.91433  | 10.480 | 71  | 82 | -170 D |
| 2008 | 7  | 24 | 4  | 14 | 7.280  | 2,6 | 46.03600 | 6.92117  | 9.770  | 235 | 80 | -177 D |
| 2008 | 7  | 27 | 22 | 50 | 33.200 | 1,2 | 46.18850 | 6.82250  | 10.380 | 84  | 86 | -154 D |
| 2008 | 8  | 9  | 19 | 16 | 28.080 | 1,5 | 44.62950 | 6.87833  | 11.860 | 334 | 77 | -175 D |
| 2008 | 8  | 10 | 11 | 49 | 39.270 | 1,9 | 44.20267 | 7.15583  | 12.990 | 336 | 76 | -111 D |
| 2008 | 8  | 14 | 3  | 32 | 52.490 | 2,8 | 44.45400 | 7.25600  | 10.300 | 177 | 65 | -105 D |
| 2008 | 8  | 17 | 5  | 1  | 39.220 | 1,5 | 46.32650 | 7.51500  | 9.350  | 118 | 79 | -165 D |
| 2008 | 8  | 20 | 16 | 42 | 13.290 | 2,5 | 44.82350 | 7.26700  | 10.690 | 74  | 43 | -87 B  |
| 2008 | 8  | 21 | 14 | 2  | 1.090  | 2,2 | 44.89783 | 6.66950  | 9.000  | 157 | 86 | -158 D |
| 2008 | 8  | 29 | 15 | 24 | 3.070  | 2   | 44.55567 | 7.26650  | 16.150 | 7   | 56 | -135 D |
| 2008 | 8  | 30 | 2  | 33 | 6.030  | 1,7 | 45.99517 | 6.18750  | 8.390  | 261 | 82 | -173 D |
| 2008 | 9  | 18 | 2  | 59 | 48.080 | 1,4 | 44.58250 | 7.15217  | 13.640 | 24  | 54 | -76 D  |
| 2008 | 9  | 19 | 12 | 28 | 51.380 | 1,4 | 44.53983 | 6.72550  | 8.720  | 241 | 71 | -129 D |
| 2008 | 9  | 23 | 6  | 14 | 10.410 | 2   | 43.97533 | 7.31567  | 9.510  | 127 | 87 | -139 D |
| 2008 | 10 | 8  | 23 | 8  | 31.070 | 2,4 | 44.79117 | 6.77167  | 9.800  | 19  | 82 | 96 B   |
| 2008 | 10 | 10 | 13 | 55 | 38.810 | 2,2 | 44.58033 | 6.83950  | 10.990 | 194 | 51 | -112 C |
| 2008 | 10 | 10 | 18 | 17 | 58.270 | 1,7 | 44.57967 | 6.83467  | 11.670 | 359 | 88 | -135 D |
| 2008 | 10 | 14 | 16 | 47 | 47.080 | 1,8 | 46.13617 | 7.04783  | 7.560  | 240 | 76 | -177 D |
| 2008 | 10 | 16 | 22 | 20 | 10.570 | 1,2 | 44.53233 | 6.67817  | 9.530  | 175 | 76 | -92 D  |
| 2008 | 10 | 21 | 10 | 1  | 43.450 | 1,4 | 44.52433 | 6.57517  | 11.390 | 335 | 88 | 153 D  |
| 2008 | 10 | 24 | 3  | 6  | 39.370 | 4,1 | 44.36733 | 7.31250  | 14.470 | 213 | 68 | -94 D  |
| 2008 | 10 | 24 | 3  | 47 | 29.610 | 2,8 | 44.37233 | 7.29817  | 13.210 | 200 | 64 | -77 D  |

|      |    |    |    |    |        |     |          |          |        |     |    |        |
|------|----|----|----|----|--------|-----|----------|----------|--------|-----|----|--------|
| 2008 | 10 | 24 | 4  | 22 | 34.500 | 2,4 | 44.36517 | 7.29650  | 14.110 | 193 | 45 | -90 D  |
| 2008 | 10 | 24 | 7  | 6  | 10.360 | 2   | 44.36067 | 7.29367  | 13.990 | 179 | 53 | -98 D  |
| 2008 | 10 | 27 | 11 | 51 | 3.230  | 1,8 | 44.35767 | 7.28567  | 13.840 | 329 | 53 | -151 D |
| 2008 | 10 | 28 | 9  | 36 | 7.290  | 1,5 | 44.79733 | 6.71733  | 11.730 | 283 | 61 | 180 D  |
| 2008 | 11 | 3  | 3  | 7  | 15.140 | 2   | 44.85333 | 7.25633  | 11.510 | 4   | 79 | 156 D  |
| 2008 | 11 | 3  | 18 | 7  | 24.790 | 2   | 44.59550 | 7.16183  | 10.330 | 325 | 44 | 91 D   |
| 2008 | 11 | 9  | 7  | 22 | 30.920 | 3,2 | 46.79333 | 9.21833  | 10.600 | 69  | 87 | 163 D  |
| 2008 | 11 | 11 | 15 | 33 | 49.230 | 2   | 45.79183 | 7.07250  | 8.880  | 222 | 88 | -131 D |
| 2008 | 11 | 20 | 13 | 20 | 18.420 | 2,8 | 46.04100 | 6.92367  | 9.140  | 231 | 90 | -163 D |
| 2008 | 11 | 26 | 9  | 46 | 14.480 | 2,1 | 44.54183 | 7.26450  | 14.900 | 349 | 36 | -95 D  |
| 2008 | 11 | 29 | 0  | 22 | 30.130 | 1,7 | 45.74033 | 5.40867  | 10.870 | 255 | 80 | 168 D  |
| 2008 | 11 | 29 | 18 | 43 | 57.530 | 2,5 | 44.57683 | 6.83183  | 11.100 | 202 | 47 | -110 D |
| 2008 | 12 | 6  | 6  | 24 | 33.350 | 1,8 | 44.71416 | 6.66183  | 7.470  | 257 | 81 | 169 D  |
| 2008 | 12 | 6  | 23 | 34 | 47.920 | 1,9 | 44.55483 | 6.89933  | 10.980 | 330 | 76 | 173 D  |
| 2008 | 12 | 6  | 23 | 50 | 11.440 | 1,7 | 44.55583 | 6.89750  | 11.640 | 318 | 90 | 149 D  |
| 2008 | 12 | 7  | 11 | 40 | 59.760 | 2,3 | 44.55567 | 6.90517  | 10.820 | 333 | 75 | 171 D  |
| 2008 | 12 | 7  | 11 | 42 | 57.420 | 1,6 | 44.55433 | 6.89667  | 11.730 | 331 | 76 | 179 D  |
| 2008 | 12 | 7  | 11 | 53 | 0.480  | 1,9 | 44.55467 | 6.89783  | 11.560 | 157 | 80 | -138 D |
| 2008 | 12 | 7  | 22 | 36 | 37.680 | 2,4 | 44.55917 | 6.91883  | 10.390 | 6   | 25 | -113 D |
| 2008 | 12 | 8  | 0  | 43 | 5.360  | 1,5 | 44.56017 | 6.89867  | 11.600 | 331 | 74 | 143 D  |
| 2008 | 12 | 8  | 5  | 49 | 49.740 | 2,3 | 44.55416 | 6.89800  | 10.550 | 153 | 81 | -141 D |
| 2008 | 12 | 11 | 0  | 22 | 34.240 | 2,3 | 44.55416 | 6.87717  | 11.010 | 14  | 36 | -90 D  |
| 2008 | 12 | 11 | 9  | 35 | 33.730 | 1,7 | 44.55300 | 6.89950  | 11.160 | 13  | 32 | -78 D  |
| 2008 | 12 | 12 | 18 | 47 | 48.860 | 1,4 | 44.55450 | 6.89033  | 11.080 | 339 | 88 | 125 D  |
| 2008 | 12 | 13 | 0  | 47 | 18.900 | 1,8 | 44.70833 | 6.66817  | 10.220 | 37  | 84 | -161 D |
| 2008 | 12 | 13 | 5  | 46 | 38.050 | 2,2 | 44.55416 | 6.89850  | 11.140 | 142 | 83 | -169 D |
| 2008 | 12 | 13 | 6  | 2  | 23.380 | 3,3 | 46.51333 | 10.06433 | 9.150  | 77  | 77 | -170 D |
| 2008 | 12 | 14 | 2  | 23 | 23.760 | 2,4 | 44.55467 | 6.89767  | 11.180 | 359 | 37 | -119 D |
| 2008 | 12 | 20 | 15 | 48 | 1.320  | 1,3 | 44.55500 | 6.88917  | 11.540 | 314 | 81 | 147 D  |
| 2008 | 12 | 22 | 3  | 32 | 35.790 | 1,7 | 44.55483 | 6.88883  | 11.680 | 165 | 65 | -129 D |
| 2008 | 12 | 25 | 17 | 37 | 26.800 | 1,5 | 44.71433 | 6.64833  | 7.450  | 305 | 71 | 141 D  |
| 2008 | 12 | 29 | 2  | 17 | 20.220 | 1,9 | 44.70867 | 6.65100  | 7.550  | 199 | 83 | 128 D  |
| 2008 | 12 | 29 | 3  | 41 | 48.350 | 1,4 | 44.70950 | 6.65167  | 7.540  | 203 | 90 | 94 D   |
| 2008 | 12 | 30 | 12 | 51 | 4.780  | 2,1 | 45.59850 | 6.63867  | 9.510  | 247 | 53 | -96 D  |
| 2009 | 1  | 18 | 5  | 9  | 30.980 | 1,5 | 44.63283 | 6.71850  | 9.690  | 219 | 89 | -130 D |
| 2009 | 1  | 19 | 13 | 12 | 24.170 | 3   | 46.61450 | 7.48450  | 5.500  | 101 | 56 | -161 D |
| 2009 | 1  | 23 | 18 | -1 | 58.160 | 1,9 | 44.64034 | 6.80150  | 11.090 | 216 | 90 | -93 D  |
| 2009 | 1  | 31 | 5  | 30 | 18.170 | 1,7 | 44.46717 | 7.29783  | 13.920 | 176 | 65 | 116 D  |
| 2009 | 2  | 8  | 7  | 21 | 42.960 | 1,6 | 44.58000 | 6.82467  | 11.630 | 339 | 82 | -115 D |
| 2009 | 2  | 9  | 14 | 18 | 13.800 | 2,8 | 44.35433 | 6.36167  | 7.520  | 150 | 83 | 146 D  |
| 2009 | 2  | 20 | 0  | 47 | 29.940 | 1,9 | 44.56850 | 7.20017  | 11.090 | 328 | 61 | -154 D |
| 2009 | 2  | 27 | 6  | 49 | 11.210 | 1,5 | 44.51450 | 6.86867  | 9.640  | 226 | 42 | 152 D  |
| 2009 | 3  | 4  | 9  | 59 | 6.760  | 1,8 | 44.28450 | 7.15533  | 12.370 | 316 | 88 | -168 D |
| 2009 | 3  | 31 | 10 | 2  | 31.800 | 1,4 | 44.42767 | 6.97400  | 10.050 | 184 | 39 | -114 D |
| 2009 | 4  | 2  | 11 | 57 | 21.100 | 2,1 | 44.30433 | 7.27733  | 14.730 | 337 | 80 | -142 D |
| 2009 | 4  | 19 | 12 | 39 | 50.410 | 4   | 44.74833 | 7.89167  | 29.180 | 230 | 63 | 130 C  |
| 2009 | 4  | 26 | 18 | 27 | 19.280 | 2,2 | 45.99883 | 6.97400  | 9.220  | 211 | 79 | -151 D |
| 2009 | 5  | 2  | 17 | 20 | 41.080 | 1,6 | 44.32017 | 6.47333  | 15.570 | 335 | 78 | -166 D |
| 2009 | 5  | 3  | 6  | 13 | 54.250 | 1,8 | 44.21567 | 6.90083  | 12.000 | 147 | 84 | 164 D  |
| 2009 | 5  | 7  | 7  | 23 | 54.150 | 1,7 | 45.63450 | 6.52250  | 13.670 | 241 | 60 | -151 D |
| 2009 | 6  | 27 | 18 | 57 | 25.470 | 1,7 | 44.38100 | 7.38800  | 14.700 | 57  | 80 | 139 D  |
| 2009 | 6  | 28 | 4  | 14 | 46.170 | 2,2 | 44.33267 | 7.20867  | 10.360 | 268 | 84 | -133 D |
| 2009 | 7  | 2  | 23 | 8  | 8.140  | 2,6 | 46.57233 | 9.34783  | 10.610 | 209 | 66 | 125 D  |

|      |    |    |    |    |        |     |          |         |        |     |    |        |
|------|----|----|----|----|--------|-----|----------|---------|--------|-----|----|--------|
| 2009 | 7  | 4  | 4  | 4  | 15.480 | 2   | 44.54167 | 7.16033 | 9.610  | 334 | 77 | 133 D  |
| 2009 | 7  | 9  | 18 | 48 | 48.750 | 3,2 | 44.81833 | 6.64133 | 8.040  | 27  | 44 | -117 C |
| 2009 | 7  | 15 | 17 | 20 | 23.840 | 2,4 | 44.62250 | 6.89867 | 10.270 | 266 | 31 | -158 D |
| 2009 | 7  | 20 | 3  | 59 | 25.170 | 1,8 | 44.48567 | 6.93383 | 8.040  | 148 | 38 | -112 D |
| 2009 | 7  | 28 | 12 | 29 | 19.170 | 2   | 45.02100 | 6.92350 | 10.020 | 63  | 19 | -27 D  |
| 2009 | 7  | 31 | 4  | 15 | 50.520 | 2   | 44.73517 | 6.83800 | 9.440  | 230 | 45 | -103 D |
| 2009 | 8  | 5  | 15 | 21 | 41.210 | 1,7 | 44.71617 | 6.72650 | 8.810  | 306 | 84 | 170 D  |
| 2009 | 8  | 11 | 4  | 7  | 21.180 | 1,8 | 44.45317 | 7.27950 | 16.130 | 323 | 87 | -168 D |
| 2009 | 8  | 13 | 17 | 35 | 25.740 | 2   | 44.46000 | 7.28717 | 15.040 | 179 | 64 | -104 D |
| 2009 | 8  | 16 | 22 | 52 | 6.770  | 2,4 | 44.85733 | 6.73217 | 5.150  | 217 | 81 | 121 D  |
| 2009 | 8  | 17 | 21 | 40 | 59.830 | 1,6 | 44.82333 | 6.69517 | 9.780  | 179 | 58 | -98 D  |
| 2009 | 8  | 17 | 22 | 52 | 53.550 | 2   | 44.79683 | 6.76950 | 10.220 | 94  | 85 | 158 D  |
| 2009 | 8  | 18 | 3  | 23 | 19.020 | 1,1 | 46.23183 | 7.34983 | 10.210 | 233 | 79 | -113 D |
| 2009 | 8  | 19 | 23 | 58 | 17.960 | 2,6 | 44.34683 | 7.30233 | 16.800 | 325 | 56 | -106 D |
| 2009 | 8  | 21 | 7  | 28 | 0.090  | 1,5 | 45.41733 | 6.61217 | 10.280 | 42  | 84 | 150 D  |
| 2009 | 8  | 21 | 22 | 58 | 23.660 | 1,8 | 44.59750 | 7.26567 | 13.320 | 133 | 81 | 146 D  |
| 2009 | 8  | 22 | 17 | 22 | 4.120  | 2,6 | 44.73667 | 6.67217 | 8.560  | 330 | 43 | -153 D |
| 2009 | 8  | 23 | 14 | 34 | 27.510 | 3   | 44.64967 | 6.82983 | 8.930  | 245 | 35 | 161 B  |
| 2009 | 8  | 27 | 0  | 38 | 36.000 | 2,5 | 44.42667 | 6.88883 | 10.210 | 339 | 85 | -178 D |
| 2009 | 8  | 27 | 5  | 36 | 4.540  | 1,7 | 44.54800 | 6.85717 | 9.640  | 28  | 53 | -171 D |
| 2009 | 8  | 31 | 9  | 34 | 17.100 | 2,7 | 44.32450 | 7.43017 | 14.450 | 338 | 32 | -136 D |
| 2009 | 9  | 1  | 15 | 43 | 41.170 | 1,1 | 44.47933 | 6.84183 | 11.550 | 150 | 75 | 152 D  |
| 2009 | 9  | 2  | 6  | 15 | 0.920  | 1,7 | 45.33900 | 6.03117 | 11.190 | 224 | 84 | 136 D  |
| 2009 | 9  | 2  | 15 | 26 | 6.920  | 2,8 | 44.75733 | 6.77233 | 7.550  | 192 | 71 | -69 A  |
| 2009 | 9  | 11 | 6  | 34 | 37.840 | 3,2 | 46.54117 | 9.70833 | 12.410 | 103 | 72 | -145 D |
| 2009 | 9  | 17 | 17 | 17 | 20.850 | 3   | 44.36617 | 7.28450 | 14.590 | 162 | 78 | -109 D |
| 2009 | 9  | 21 | 7  | 45 | 54.670 | 1,6 | 44.52367 | 6.64383 | 10.840 | 336 | 42 | -172 D |
| 2009 | 9  | 28 | 20 | 42 | 52.070 | 1,9 | 44.30567 | 7.34950 | 17.350 | 57  | 73 | 156 D  |
| 2009 | 9  | 29 | 23 | 20 | 0.820  | 2,4 | 44.77133 | 7.61783 | 23.550 | 204 | 54 | 120 D  |
| 2009 | 10 | 1  | 18 | 45 | 38.790 | 1,6 | 45.44033 | 6.05700 | 12.730 | 207 | 40 | 101 D  |
| 2009 | 10 | 1  | 20 | 52 | 25.250 | 2,2 | 45.44767 | 6.05450 | 11.110 | 296 | 40 | 104 D  |
| 2009 | 10 | 5  | 17 | 27 | 57.940 | 1   | 44.47283 | 6.92700 | 11.070 | 291 | 35 | 178 D  |
| 2009 | 10 | 8  | 17 | 45 | 33.300 | 2,3 | 46.31933 | 7.28250 | 9.190  | 92  | 83 | -160 D |
| 2009 | 10 | 10 | 14 | 9  | 20.100 | 2   | 46.31850 | 7.28067 | 8.660  | 110 | 40 | -162 D |
| 2009 | 10 | 21 | 16 | 10 | 58.390 | 2,8 | 46.14167 | 6.75017 | 8.230  | 55  | 71 | -160 D |
| 2009 | 10 | 24 | 22 | 43 | 42.150 | 1,9 | 44.71150 | 6.85683 | 9.450  | 72  | 44 | -81 D  |
| 2009 | 11 | 17 | 8  | 4  | 51.210 | 1,5 | 44.49283 | 6.91550 | 8.660  | 340 | 88 | 110 D  |
| 2009 | 11 | 20 | 10 | 5  | 15.220 | 1,6 | 45.05800 | 6.20050 | 10.070 | 204 | 83 | -148 D |
| 2009 | 11 | 25 | 20 | 2  | 25.380 | 2,3 | 44.57567 | 7.21967 | 11.090 | 25  | 47 | -95 D  |
| 2009 | 12 | 4  | 2  | 22 | 24.770 | 2,2 | 45.10966 | 7.34183 | 17.370 | 204 | 80 | -171 D |
| 2009 | 12 | 8  | 8  | 40 | 1.090  | 1,6 | 44.42567 | 6.86883 | 11.490 | 2   | 51 | -95 D  |
| 2009 | 12 | 13 | 6  | 42 | 8.090  | 1,2 | 44.47333 | 6.92833 | 10.120 | 275 | 88 | -174 D |
| 2009 | 12 | 17 | 11 | 39 | 28.430 | 2,3 | 44.35700 | 7.29467 | 13.220 | 181 | 39 | -86 D  |
| 2009 | 12 | 17 | 15 | 38 | 20.720 | 1,9 | 45.35817 | 6.69000 | 8.400  | 12  | 86 | 151 D  |
| 2009 | 12 | 17 | 22 | 0  | 31.800 | 1,9 | 44.36017 | 7.29267 | 13.700 | 2   | 30 | -78 D  |
| 2009 | 12 | 17 | 23 | 18 | 38.130 | 3,1 | 44.35850 | 7.30483 | 13.160 | 335 | 38 | -123 D |
| 2009 | 12 | 18 | 1  | 35 | 5.630  | 2   | 44.35300 | 7.28800 | 13.280 | 208 | 60 | -95 D  |
| 2009 | 12 | 25 | 6  | 24 | 15.470 | 2,2 | 44.58000 | 6.84100 | 11.580 | 322 | 83 | -143 D |
| 2009 | 12 | 29 | 3  | 45 | 39.020 | 1,7 | 44.83050 | 6.73433 | 9.620  | 293 | 83 | -175 D |
| 2009 | 12 | 31 | 10 | 49 | 35.610 | 2,6 | 46.23250 | 7.67117 | 10.850 | 75  | 63 | -148 D |
| 2010 | 1  | 2  | 14 | 21 | 0.820  | 1,9 | 44.39117 | 6.61617 | 10.350 | 287 | 73 | 109 D  |
| 2010 | 1  | 19 | 19 | 48 | 55.350 | 1,8 | 45.81217 | 7.10967 | 7.810  | 217 | 82 | -107 D |
| 2010 | 1  | 26 | 12 | 44 | 46.390 | 2   | 44.83050 | 6.74533 | 9.560  | 119 | 88 | 147 D  |

|      |   |    |    |    |        |     |          |         |        |     |    |        |
|------|---|----|----|----|--------|-----|----------|---------|--------|-----|----|--------|
| 2010 | 1 | 31 | 14 | 22 | 3.970  | 2,4 | 46.34700 | 7.31050 | 7.170  | 90  | 88 | -170 D |
| 2010 | 2 | 1  | 10 | 53 | 25.560 | 2   | 45.11000 | 7.31200 | 14.020 | 331 | 48 | -93 D  |
| 2010 | 2 | 1  | 11 | 21 | 34.010 | 1,7 | 46.34367 | 7.31000 | 6.560  | 255 | 60 | 134 D  |
| 2010 | 2 | 3  | 5  | 5  | 7.100  | 1,5 | 44.54883 | 6.82167 | 8.980  | 281 | 71 | -94 D  |
| 2010 | 2 | 5  | 2  | 36 | 9.700  | 2,9 | 44.36600 | 7.26800 | 12.420 | 320 | 65 | -115 D |
| 2010 | 2 | 5  | 2  | 36 | 9.700  | 2,9 | 44.36600 | 7.26800 | 12.420 | 238 | 36 | -111 D |
| 2010 | 2 | 10 | 23 | 29 | 29.240 | 1,9 | 46.13283 | 7.20517 | 11.380 | 315 | 33 | -59 D  |
| 2010 | 2 | 11 | 22 | 2  | 32.870 | 1,9 | 44.86433 | 6.74417 | 10.430 | 297 | 33 | -116 D |
| 2010 | 2 | 19 | 3  | 17 | 45.990 | 1,9 | 45.98750 | 8.29167 | 16.410 | 64  | 39 | -97 D  |
| 2010 | 3 | 12 | 13 | 38 | 42.790 | 2,4 | 44.43250 | 7.32600 | 14.010 | 34  | 67 | 109 D  |
| 2010 | 3 | 17 | 20 | 14 | 36.480 | 1,8 | 44.39333 | 7.27033 | 14.480 | 151 | 50 | -172 D |
| 2010 | 3 | 22 | 17 | 2  | 21.210 | 1,7 | 44.32267 | 6.46700 | 10.590 | 1   | 77 | -140 D |
| 2010 | 3 | 22 | 22 | 26 | 3.680  | 2   | 44.32183 | 6.46800 | 9.780  | 354 | 89 | 160 D  |
| 2010 | 3 | 23 | 18 | 19 | 12.200 | 1,3 | 44.32784 | 6.46500 | 10.520 | 168 | 35 | 168 D  |
| 2010 | 3 | 24 | 17 | 11 | 28.270 | 1,2 | 44.32217 | 6.47567 | 10.220 | 141 | 39 | -107 D |
| 2010 | 3 | 25 | 5  | 37 | 4.110  | 1,4 | 45.77167 | 7.02000 | 10.240 | 346 | 88 | -178 D |
| 2010 | 4 | 4  | 21 | 16 | 28.170 | 3,1 | 45.86717 | 7.50617 | 6.450  | 34  | 60 | -172 C |
| 2010 | 4 | 7  | 8  | 36 | 13.590 | 1,6 | 44.48683 | 6.99000 | 11.150 | 133 | 71 | -146 D |
| 2010 | 4 | 19 | 11 | 33 | 36.940 | 2,1 | 43.52133 | 7.79900 | 26.840 | 283 | 87 | -130 D |
| 2010 | 4 | 20 | 23 | 3  | 31.670 | 1,8 | 45.42333 | 6.56533 | 10.980 | 232 | 57 | -144 D |
| 2010 | 4 | 22 | 3  | 0  | 46.930 | 1,4 | 44.55833 | 6.86067 | 11.120 | 322 | 87 | -177 D |
| 2010 | 4 | 23 | 7  | 19 | 57.980 | 1,8 | 44.35133 | 7.27767 | 13.720 | 193 | 64 | -86 D  |
| 2010 | 5 | 1  | 3  | 48 | 25.940 | 2,3 | 46.30400 | 8.97783 | 13.730 | 120 | 86 | 143 D  |
| 2010 | 5 | 1  | 17 | 9  | 14.590 | 1,6 | 44.10183 | 7.07183 | 11.780 | 89  | 74 | -131 D |
| 2010 | 5 | 9  | 23 | 32 | 10.860 | 1,1 | 44.56150 | 6.86100 | 10.300 | 113 | 87 | 107 D  |
| 2010 | 5 | 21 | 17 | 9  | 17.140 | 2,4 | 44.58667 | 7.23167 | 12.860 | 323 | 78 | -172 D |
| 2010 | 5 | 26 | 20 | 14 | 42.270 | 2,4 | 45.10883 | 7.38750 | 15.450 | 244 | 53 | -114 D |
| 2010 | 5 | 29 | 6  | 42 | 24.520 | 1,8 | 44.35433 | 7.28383 | 15.280 | 164 | 37 | -93 D  |
| 2010 | 5 | 29 | 12 | 13 | 43.370 | 2   | 44.35300 | 7.27617 | 13.170 | 336 | 48 | -125 D |
| 2010 | 6 | 2  | 5  | 12 | 31.430 | 1,8 | 45.77183 | 7.08600 | 10.130 | 55  | 17 | -108 D |
| 2010 | 6 | 7  | 13 | 19 | 26.740 | 2,3 | 46.42883 | 8.59183 | 12.060 | 61  | 78 | -158 D |
| 2010 | 6 | 9  | 2  | 33 | 27.970 | 1,7 | 44.79984 | 7.20250 | 11.940 | 340 | 43 | -109 D |
| 2010 | 6 | 13 | 18 | 53 | 9.680  | 1,6 | 44.98333 | 6.58833 | 9.740  | 340 | 50 | -89 D  |
| 2010 | 6 | 14 | 3  | 11 | 22.530 | 2   | 44.22867 | 6.77000 | 12.490 | 150 | 25 | 152 D  |
| 2010 | 6 | 14 | 4  | 7  | 39.930 | 2   | 46.41983 | 6.71467 | 8.070  | 54  | 69 | 173 D  |
| 2010 | 6 | 16 | 9  | 52 | 21.830 | 2   | 44.49917 | 7.27583 | 16.320 | 129 | 49 | -93 D  |
| 2010 | 6 | 23 | 6  | 50 | 27.270 | 1,8 | 44.79283 | 7.24850 | 16.370 | 161 | 58 | -107 D |
| 2010 | 6 | 24 | 11 | 46 | 23.930 | 2   | 44.98317 | 5.64617 | 9.910  | 45  | 74 | 176 D  |
| 2010 | 6 | 24 | 17 | 57 | 22.140 | 2,1 | 44.98767 | 5.64733 | 9.250  | 225 | 78 | -178 D |
| 2010 | 6 | 24 | 18 | 13 | 16.210 | 1,7 | 46.08233 | 6.65133 | 8.890  | 34  | 39 | 111 D  |
| 2010 | 6 | 26 | 0  | 37 | 3.140  | 1,1 | 44.98633 | 6.59950 | 10.660 | 174 | 90 | -138 D |
| 2010 | 6 | 30 | 11 | 53 | 43.330 | 3,7 | 45.39500 | 6.49733 | 6.600  | 234 | 46 | -115 B |
| 2010 | 7 | 8  | 20 | 20 | 50.270 | 2,5 | 43.80017 | 5.79583 | 4.680  | 119 | 88 | 104 D  |
| 2010 | 7 | 10 | 2  | 41 | 36.870 | 2,5 | 46.03983 | 7.67967 | 7.780  | 132 | 47 | 108 C  |
| 2010 | 7 | 29 | 8  | 48 | 35.880 | 2   | 44.97867 | 6.58783 | 8.920  | 5   | 31 | -121 D |
| 2010 | 7 | 31 | 7  | 30 | 6.690  | 1,4 | 44.52983 | 7.16333 | 17.100 | 17  | 61 | -99 D  |
| 2010 | 8 | 10 | 5  | 35 | 59.130 | 1,4 | 44.41917 | 6.70183 | 12.730 | 224 | 49 | -98 D  |
| 2010 | 8 | 11 | 1  | 28 | 54.870 | 3,1 | 45.54683 | 7.82233 | 7.550  | 254 | 75 | 154 D  |
| 2010 | 8 | 21 | 2  | 59 | 40.030 | 1,2 | 45.20483 | 7.00583 | 10.540 | 114 | 78 | 158 D  |
| 2010 | 8 | 22 | 11 | 14 | 10.840 | 2,4 | 46.33433 | 7.39683 | 8.650  | 93  | 45 | -130 C |
| 2010 | 8 | 22 | 18 | 40 | 32.240 | 1,2 | 44.81384 | 7.21667 | 14.440 | 163 | 28 | -67 D  |
| 2010 | 8 | 22 | 20 | 48 | 38.660 | 1,2 | 45.01200 | 6.73400 | 11.270 | 108 | 78 | -115 D |
| 2010 | 8 | 24 | 1  | 15 | 49.230 | 2,3 | 44.47367 | 7.19250 | 13.460 | 2   | 38 | -143 D |

\*

\*



|      |    |    |    |    |        |     |          |         |        |     |    |        |
|------|----|----|----|----|--------|-----|----------|---------|--------|-----|----|--------|
| 2010 | 8  | 28 | 21 | 59 | 24.470 | 1,8 | 44.70284 | 6.76350 | 9.330  | 202 | 63 | -109 D |
| 2010 | 8  | 29 | 8  | 11 | 37.580 | 1,2 | 45.26117 | 6.55800 | 9.790  | 135 | 87 | 117 D  |
| 2010 | 9  | 2  | 17 | 17 | 48.310 | 2,1 | 44.06267 | 7.26950 | 7.300  | 187 | 46 | -158 D |
| 2010 | 9  | 3  | 9  | 24 | 28.560 | 1,4 | 44.62117 | 6.83283 | 9.760  | 268 | 49 | -93 D  |
| 2010 | 9  | 3  | 11 | 20 | 35.520 | 1,9 | 44.15733 | 7.48283 | 12.070 | 325 | 60 | -144 D |
| 2010 | 9  | 4  | 17 | 24 | 17.200 | 1   | 44.42733 | 7.01950 | 12.290 | 299 | 89 | 171 D  |
| 2010 | 9  | 6  | 14 | 34 | 59.900 | 1,8 | 44.56133 | 6.88817 | 10.550 | 325 | 78 | -133 D |
| 2010 | 9  | 16 | 17 | 38 | 18.720 | 1,1 | 44.62167 | 6.88883 | 11.740 | 80  | 88 | -152 D |
| 2010 | 9  | 17 | 13 | 34 | 55.980 | 1,2 | 44.30833 | 6.81733 | 12.170 | 142 | 71 | 163 D  |
| 2010 | 9  | 20 | 3  | 29 | 58.260 | 1,4 | 44.74500 | 7.62900 | 25.070 | 323 | 50 | 130 D  |
| 2010 | 9  | 22 | 2  | 43 | 39.420 | 1,1 | 44.45967 | 6.94733 | 11.670 | 118 | 87 | -164 D |
| 2010 | 9  | 22 | 4  | 10 | 10.740 | 2,4 | 44.78483 | 6.77433 | 10.290 | 293 | 10 | -173 C |
| 2010 | 9  | 27 | 23 | 31 | 59.070 | 1,3 | 45.10750 | 6.53817 | 11.020 | 340 | 71 | 161 D  |
| 2010 | 9  | 29 | 1  | 46 | 42.570 | 2,8 | 44.52067 | 7.27583 | 12.000 | 214 | 33 | -110 B |
| 2010 | 10 | 2  | 14 | 8  | 19.060 | 1,8 | 44.40717 | 7.36000 | 11.600 | 66  | 63 | 134 D  |
| 2010 | 10 | 6  | 21 | 54 | 46.310 | 1,8 | 45.73683 | 7.20767 | 9.670  | 246 | 53 | -131 D |
| 2010 | 10 | 10 | 11 | 23 | 12.330 | 2,2 | 44.46684 | 7.19017 | 14.640 | 358 | 38 | -118 D |
| 2010 | 10 | 14 | 3  | 16 | 42.740 | 1,2 | 44.60917 | 7.23083 | 13.990 | 296 | 35 | -93 D  |
| 2010 | 10 | 17 | 10 | 7  | 23.190 | 2   | 44.61666 | 7.24683 | 14.330 | 266 | 43 | -91 D  |
| 2010 | 10 | 17 | 20 | 25 | 46.790 | 1,6 | 44.61733 | 7.23083 | 13.940 | 171 | 19 | -112 D |
| 2010 | 10 | 20 | 7  | 9  | 56.930 | 2   | 44.60783 | 7.22950 | 14.060 | 183 | 76 | 177 D  |
| 2010 | 10 | 20 | 11 | 10 | 28.290 | 1,6 | 44.61567 | 7.22033 | 14.010 | 86  | 46 | -106 D |
| 2010 | 10 | 20 | 20 | 53 | 52.170 | 1,6 | 44.60833 | 7.21867 | 13.250 | 356 | 82 | -176 D |
| 2010 | 10 | 20 | 23 | 36 | 20.860 | 2,1 | 44.60067 | 7.22133 | 13.210 | 175 | 89 | 177 D  |
| 2010 | 10 | 21 | 1  | 21 | 17.300 | 1,8 | 44.59433 | 7.22267 | 12.400 | 357 | 47 | 143 D  |
| 2010 | 10 | 21 | 13 | 5  | 0.420  | 2   | 44.60317 | 7.24817 | 13.920 | 197 | 88 | 130 D  |
| 2010 | 10 | 21 | 13 | 38 | 18.360 | 1,8 | 44.60400 | 7.22083 | 14.060 | 176 | 87 | 167 D  |
| 2010 | 10 | 21 | 15 | 8  | 5.740  | 1,6 | 44.60217 | 7.23800 | 15.660 | 195 | 76 | -132 D |
| 2010 | 10 | 21 | 15 | 13 | 49.270 | 2,2 | 44.62183 | 7.23000 | 13.620 | 214 | 55 | -84 D  |
| 2010 | 10 | 21 | 16 | 19 | 25.610 | 1,7 | 44.60900 | 7.22000 | 13.710 | 12  | 75 | 168 D  |
| 2010 | 10 | 21 | 17 | 10 | 44.550 | 1,3 | 44.62083 | 7.23167 | 14.860 | 221 | 50 | -85 D  |
| 2010 | 10 | 21 | 23 | 12 | 6.520  | 1,5 | 44.59566 | 7.21300 | 13.440 | 24  | 89 | -158 D |
| 2010 | 10 | 22 | 0  | 29 | 7.730  | 0,2 | 44.60700 | 7.22817 | 14.950 | 201 | 87 | -151 D |
| 2010 | 10 | 22 | 8  | 27 | 33.650 | 1,9 | 44.60883 | 7.24000 | 14.070 | 187 | 84 | 178 D  |
| 2010 | 10 | 22 | 12 | 6  | 28.930 | 2   | 44.61067 | 7.24050 | 14.090 | 12  | 82 | -168 D |
| 2010 | 10 | 22 | 20 | 33 | 0.220  | 2   | 45.51033 | 7.08983 | 7.020  | 246 | 81 | 117 D  |
| 2010 | 10 | 22 | 22 | 29 | 26.340 | 2   | 45.51483 | 7.10683 | 8.320  | 216 | 89 | -173 D |
| 2010 | 10 | 23 | 2  | 26 | 2.270  | 1,5 | 44.60867 | 7.24500 | 15.670 | 32  | 74 | 124 D  |
| 2010 | 10 | 23 | 3  | 18 | 14.480 | 1,3 | 44.61067 | 7.23900 | 14.710 | 142 | 56 | 161 D  |
| 2010 | 10 | 23 | 3  | 19 | 11.670 | 2   | 44.60917 | 7.23183 | 13.920 | 28  | 80 | -174 D |
| 2010 | 10 | 23 | 16 | 9  | 8.470  | 1,6 | 44.60717 | 7.22017 | 14.140 | 176 | 71 | 119 D  |
| 2010 | 10 | 23 | 20 | 40 | 30.410 | 2,3 | 44.60883 | 7.25367 | 14.120 | 183 | 88 | 166 D  |
| 2010 | 10 | 23 | 21 | 13 | 51.860 | 2,2 | 44.61050 | 7.24900 | 12.900 | 181 | 80 | 149 D  |
| 2010 | 10 | 23 | 21 | 19 | 34.310 | 1,6 | 44.61517 | 7.23833 | 14.000 | 202 | 84 | 162 D  |
| 2010 | 10 | 23 | 22 | 24 | 6.720  | 1,4 | 44.60783 | 7.23933 | 15.650 | 2   | 76 | -112 D |
| 2010 | 10 | 23 | 23 | 0  | 28.640 | 1,6 | 44.61600 | 7.23683 | 13.540 | 137 | 51 | 106 D  |
| 2010 | 10 | 24 | 9  | 21 | 4.300  | 1,5 | 44.60383 | 7.23800 | 15.080 | 253 | 53 | 77 D   |
| 2010 | 10 | 24 | 10 | 57 | 2.820  | 1,6 | 44.60450 | 7.22667 | 14.450 | 21  | 54 | 173 D  |
| 2010 | 10 | 24 | 11 | 29 | 40.400 | 3,2 | 44.60300 | 7.23817 | 11.930 | 167 | 55 | 150 C  |
| 2010 | 10 | 24 | 11 | 57 | 48.490 | 1,4 | 44.62283 | 7.23017 | 13.580 | 216 | 25 | -83 D  |
| 2010 | 10 | 24 | 12 | 10 | 42.090 | 1,5 | 44.61783 | 7.22850 | 14.180 | 184 | 45 | -88 D  |
| 2010 | 10 | 25 | 17 | 54 | 28.750 | 1,9 | 44.60950 | 7.24400 | 15.670 | 193 | 87 | 164 D  |
| 2010 | 10 | 25 | 23 | 13 | 5.690  | 1,7 | 44.60800 | 7.23467 | 15.200 | 2   | 79 | 153 D  |

|      |    |    |    |    |        |     |          |         |        |     |    |        |
|------|----|----|----|----|--------|-----|----------|---------|--------|-----|----|--------|
| 2010 | 10 | 26 | 2  | 28 | 38.960 | 1,7 | 44.60917 | 7.21833 | 14.210 | 42  | 66 | -150 D |
| 2010 | 10 | 26 | 3  | 13 | 34.800 | 1,7 | 44.60950 | 7.23667 | 14.470 | 41  | 74 | -132 D |
| 2010 | 10 | 26 | 4  | 53 | 20.700 | 1,6 | 44.60900 | 7.22867 | 14.120 | 34  | 83 | -157 D |
| 2010 | 10 | 26 | 4  | 58 | 41.550 | 2,1 | 44.60950 | 7.19050 | 17.920 | 200 | 57 | -111 D |
| 2010 | 10 | 26 | 7  | 28 | 40.610 | 2   | 44.60917 | 7.24050 | 14.900 | 184 | 90 | 169 D  |
| 2010 | 10 | 26 | 7  | 49 | 48.910 | 2,2 | 44.60900 | 7.25850 | 15.000 | 197 | 88 | 164 D  |
| 2010 | 10 | 26 | 9  | 3  | 32.390 | 2,6 | 44.60933 | 7.25550 | 14.000 | 30  | 53 | -136 D |
| 2010 | 10 | 26 | 9  | 4  | 6.710  | 2,5 | 44.60867 | 7.22133 | 12.720 | 32  | 88 | -165 D |
| 2010 | 10 | 26 | 11 | 2  | 3.600  | 1,7 | 44.60750 | 7.23050 | 14.760 | 168 | 83 | -150 D |
| 2010 | 10 | 27 | 2  | 31 | 16.520 | 1,9 | 44.61517 | 7.22833 | 13.670 | 10  | 79 | -158 D |
| 2010 | 10 | 27 | 3  | 28 | 13.060 | 1,8 | 44.61600 | 7.23100 | 13.980 | 31  | 87 | -157 D |
| 2010 | 10 | 31 | 21 | 52 | 30.670 | 2   | 45.13334 | 6.56783 | 8.970  | 221 | 88 | -148 D |
| 2010 | 10 | 31 | 22 | 14 | 15.550 | 2,2 | 45.12683 | 6.56000 | 8.830  | 39  | 85 | 173 D  |
| 2010 | 11 | 1  | 5  | 28 | 5.480  | 1,8 | 45.12917 | 6.53967 | 11.060 | 251 | 67 | -131 D |
| 2010 | 11 | 1  | 5  | 51 | 18.510 | 1,6 | 45.13350 | 6.54867 | 9.710  | 247 | 79 | -173 D |
| 2010 | 11 | 1  | 8  | 0  | 58.680 | 2,3 | 45.13217 | 6.56067 | 8.850  | 220 | 87 | -154 D |
| 2010 | 11 | 1  | 9  | 25 | 5.830  | 2,5 | 45.12200 | 6.54667 | 8.740  | 83  | 55 | -139 D |
| 2010 | 11 | 1  | 10 | 29 | 1.350  | 1,8 | 45.13350 | 6.56733 | 8.660  | 273 | 54 | -96 D  |
| 2010 | 11 | 1  | 11 | 17 | 1.330  | 2,2 | 45.12517 | 6.54083 | 9.730  | 235 | 78 | -156 D |
| 2010 | 11 | 1  | 14 | 7  | 31.500 | 1,9 | 45.12667 | 6.55850 | 9.440  | 215 | 76 | -148 D |
| 2010 | 11 | 1  | 15 | 6  | 11.650 | 1,5 | 45.12883 | 6.56650 | 8.940  | 233 | 51 | -131 D |
| 2010 | 11 | 1  | 18 | 44 | 34.920 | 2,1 | 45.12100 | 6.54917 | 9.760  | 250 | 47 | -112 D |
| 2010 | 11 | 1  | 18 | 45 | 3.400  | 2,1 | 45.11767 | 6.53767 | 9.060  | 243 | 86 | -127 D |
| 2010 | 11 | 3  | 14 | 25 | 7.480  | 1,6 | 44.70250 | 6.66667 | 8.750  | 171 | 30 | -144 D |
| 2010 | 11 | 4  | 18 | 7  | 46.880 | 1,6 | 45.34833 | 5.78900 | 7.210  | 62  | 75 | 167 D  |
| 2010 | 11 | 9  | 10 | 43 | 40.800 | 1,8 | 44.61550 | 7.23667 | 15.030 | 103 | 68 | -110 D |
| 2010 | 11 | 11 | 4  | 41 | 33.830 | 1,5 | 44.60983 | 7.21033 | 13.380 | 30  | 36 | -66 D  |
| 2010 | 11 | 11 | 13 | 37 | 46.910 | 2,1 | 44.61683 | 7.24050 | 14.220 | 26  | 46 | -87 D  |
| 2010 | 11 | 11 | 17 | 48 | 47.910 | 1,6 | 44.61350 | 7.23067 | 13.980 | 239 | 30 | -76 D  |
| 2010 | 11 | 11 | 18 | 24 | 18.460 | 2,3 | 44.61700 | 7.23550 | 13.590 | 209 | 51 | -97 D  |
| 2010 | 11 | 11 | 19 | 58 | 25.870 | 1,6 | 44.61517 | 7.24683 | 15.590 | 209 | 42 | -92 D  |
| 2010 | 11 | 11 | 20 | 2  | 15.780 | 1,8 | 44.61617 | 7.22783 | 13.580 | 197 | 37 | -72 D  |
| 2010 | 11 | 11 | 21 | 57 | 29.850 | 1,7 | 44.61450 | 7.24650 | 14.900 | 331 | 59 | -85 D  |
| 2010 | 11 | 11 | 22 | 0  | 51.950 | 2,6 | 44.61633 | 7.22900 | 11.450 | 182 | 62 | -102 C |
| 2010 | 11 | 11 | 22 | 30 | 9.210  | 1,8 | 44.61666 | 7.24567 | 14.860 | 161 | 44 | -77 D  |
| 2010 | 11 | 11 | 22 | 36 | 27.300 | 2,6 | 44.61583 | 7.22917 | 13.270 | 255 | 51 | -97 D  |
| 2010 | 11 | 11 | 22 | 44 | 39.920 | 2,2 | 44.61050 | 7.23783 | 13.420 | 192 | 49 | -102 C |
| 2010 | 11 | 11 | 23 | 2  | 46.240 | 1,6 | 44.62217 | 7.23500 | 14.330 | 30  | 43 | -99 D  |
| 2010 | 11 | 12 | 4  | 46 | 3.370  | 2,8 | 44.62317 | 7.23517 | 11.700 | 41  | 53 | -80 D  |
| 2010 | 11 | 12 | 7  | 31 | 38.390 | 1,7 | 44.62133 | 7.23583 | 14.840 | 352 | 36 | -87 D  |
| 2010 | 11 | 12 | 14 | 6  | 52.040 | 1,6 | 44.61683 | 7.22617 | 14.280 | 281 | 47 | -80 D  |
| 2010 | 11 | 14 | 0  | 45 | 1.390  | 2   | 44.62233 | 7.21850 | 13.570 | 229 | 50 | -95 D  |
| 2010 | 11 | 14 | 18 | 16 | 16.590 | 1,5 | 44.85717 | 6.64883 | 10.580 | 313 | 86 | -149 D |
| 2010 | 11 | 17 | 13 | 2  | 1.720  | 1,6 | 45.01966 | 6.57833 | 9.610  | 151 | 64 | -105 D |
| 2010 | 11 | 18 | 23 | 50 | 55.930 | 1,7 | 44.69967 | 6.66900 | 8.200  | 188 | 38 | -112 D |
| 2010 | 11 | 20 | 12 | 27 | 47.150 | 1,2 | 44.79733 | 6.76350 | 11.220 | 209 | 76 | -96 D  |
| 2010 | 11 | 24 | 22 | 34 | 5.480  | 1,3 | 46.02700 | 6.90217 | 9.260  | 237 | 86 | -146 D |
| 2010 | 11 | 26 | 9  | 41 | 23.020 | 1,6 | 45.61367 | 6.76983 | 10.940 | 236 | 55 | -97 D  |
| 2010 | 11 | 26 | 22 | 57 | 30.210 | 1,3 | 45.60966 | 6.76517 | 10.220 | 225 | 28 | -145 D |
| 2010 | 11 | 27 | 16 | 13 | 57.840 | 1,7 | 46.61550 | 7.76017 | 12.250 | 40  | 88 | 150 D  |
| 2010 | 12 | 3  | 10 | 11 | 29.140 | 2,3 | 46.30317 | 8.08117 | 11.570 | 52  | 86 | 171 D  |
| 2010 | 12 | 6  | 6  | 41 | 23.600 | 2,8 | 46.03333 | 6.90317 | 9.810  | 76  | 86 | 165 B  |
| 2010 | 12 | 8  | 1  | 54 | 49.880 | 2   | 45.12550 | 6.54917 | 10.360 | 101 | 40 | -70 D  |

|      |    |    |    |    |        |             |         |        |     |    |        |
|------|----|----|----|----|--------|-------------|---------|--------|-----|----|--------|
| 2010 | 12 | 10 | 3  | 26 | 18.120 | 1,646.53333 | 7.34783 | 8.770  | 280 | 46 | 146 D  |
| 2010 | 12 | 11 | 13 | 48 | 51.470 | 1,646.07317 | 6.48633 | 11.610 | 74  | 79 | 164 D  |
| 2010 | 12 | 13 | 12 | 11 | 37.700 | 244.69633   | 6.76417 | 10.300 | 256 | 85 | -81 D  |
| 2010 | 12 | 15 | 14 | 54 | 40.610 | 1,744.70183 | 6.66733 | 8.620  | 147 | 43 | -165 D |
| 2010 | 12 | 18 | 21 | 36 | 25.720 | 2,244.60233 | 7.19167 | 14.120 | 339 | 37 | -140 D |
| 2010 | 12 | 19 | 11 | 1  | 47.420 | 2,344.85317 | 7.21667 | 11.350 | 262 | 43 | -73 A  |
| 2010 | 12 | 19 | 11 | 2  | 20.470 | 2,844.85817 | 7.20900 | 10.500 | 25  | 66 | -119 D |
| 2010 | 12 | 31 | 6  | 23 | 1.870  | 1,346.21300 | 7.71917 | 10.420 | 300 | 41 | -89 D  |
| 2011 | 1  | 8  | 20 | 28 | 43.950 | 246.31933   | 7.51617 | 11.050 | 272 | 88 | -178 D |
| 2011 | 1  | 8  | 20 | 38 | 32.410 | 1,646.32084 | 7.51550 | 11.470 | 104 | 84 | -166 D |
| 2011 | 1  | 8  | 20 | 48 | 16.730 | 346.31433   | 7.51800 | 10.270 | 95  | 75 | -160 B |
| 2011 | 1  | 8  | 22 | 20 | 25.680 | 2,946.31400 | 7.51550 | 10.380 | 85  | 70 | -165 C |
| 2011 | 1  | 8  | 23 | 32 | 28.940 | 2,546.31867 | 7.51567 | 10.910 | 88  | 83 | 177 D  |
| 2011 | 1  | 9  | 10 | 0  | 29.850 | 1,845.45617 | 6.65050 | 8.340  | 235 | 67 | -129 D |
| 2011 | 1  | 17 | 0  | 55 | 9.430  | 1,346.04000 | 6.90567 | 9.090  | 232 | 83 | -174 D |
| 2011 | 1  | 18 | 14 | 49 | 13.440 | 1,746.31816 | 8.16883 | 13.610 | 80  | 89 | 153 D  |
| 2011 | 1  | 19 | 14 | 28 | 59.980 | 1,845.50217 | 6.69750 | 10.410 | 11  | 89 | -177 D |
| 2011 | 1  | 25 | 2  | 41 | 19.200 | 1,744.25900 | 6.22617 | 6.880  | 336 | 67 | -143 D |
| 2011 | 1  | 28 | 18 | 50 | 45.720 | 1,745.37017 | 6.50033 | 10.460 | 259 | 50 | -82 D  |
| 2011 | 1  | 29 | 8  | 45 | 44.000 | 1,645.37600 | 6.51567 | 11.890 | 241 | 51 | -121 D |
| 2011 | 1  | 31 | 3  | 51 | 55.000 | 1,744.42633 | 7.03317 | 11.010 | 147 | 89 | 170 D  |
| 2011 | 2  | 6  | 7  | 39 | 28.610 | 1,646.33383 | 7.56550 | 10.810 | 276 | 90 | -172 D |
| 2011 | 2  | 22 | 10 | 47 | 16.160 | 2,744.15667 | 7.22200 | 9.720  | 191 | 60 | -114 D |
| 2011 | 2  | 28 | 11 | 0  | 56.700 | 245.30933   | 6.47867 | 8.930  | 71  | 40 | -102 D |
| 2011 | 3  | 6  | 21 | 2  | 11.550 | 1,746.23767 | 8.24733 | 13.250 | 240 | 83 | -151 D |
| 2011 | 3  | 7  | 8  | 39 | 36.790 | 0,946.03533 | 6.90150 | 10.420 | 123 | 43 | -80 D  |
| 2011 | 3  | 10 | 17 | 53 | 46.650 | 1,344.60883 | 7.22733 | 14.880 | 347 | 40 | -91 D  |
| 2011 | 3  | 15 | 8  | 2  | 52.900 | 1,546.02867 | 6.89517 | 10.000 | 59  | 80 | 155 D  |
| 2011 | 3  | 17 | 16 | 8  | 51.430 | 1,844.48667 | 6.91833 | 8.640  | 126 | 89 | -157 D |
| 2011 | 3  | 20 | 6  | 51 | 16.430 | 1,144.47567 | 6.93400 | 10.250 | 287 | 71 | 140 D  |
| 2011 | 4  | 1  | 16 | 32 | 4.950  | 1,546.18167 | 8.33150 | 10.880 | 205 | 87 | 177 D  |
| 2011 | 4  | 3  | 16 | 32 | 56.990 | 1,144.45300 | 6.98417 | 10.700 | 20  | 54 | -100 D |
| 2011 | 4  | 5  | 19 | 18 | 24.060 | 1,644.99217 | 6.73933 | 10.390 | 19  | 36 | -84 D  |
| 2011 | 4  | 6  | 3  | 31 | 46.940 | 1,744.37267 | 7.29283 | 14.840 | 6   | 49 | -97 D  |
| 2011 | 4  | 9  | 15 | 17 | 32.880 | 1,346.02950 | 6.88783 | 9.860  | 71  | 73 | -114 D |
| 2011 | 4  | 11 | 9  | 32 | 9.150  | 2,145.12500 | 7.38950 | 12.920 | 10  | 47 | 148 D  |
| 2011 | 4  | 12 | 19 | 40 | 47.540 | 1,646.22367 | 7.33867 | 11.340 | 211 | 50 | 167 D  |
| 2011 | 4  | 16 | 23 | 49 | 27.910 | 2,344.27200 | 6.25300 | 3.510  | 14  | 14 | 171 D  |
| 2011 | 4  | 19 | 20 | 4  | 41.920 | 2,744.31100 | 7.41667 | 17.500 | 13  | 27 | -103 D |
| 2011 | 4  | 21 | 11 | 36 | 38.150 | 2,646.70883 | 8.03667 | 8.980  | 246 | 68 | 165 D  |
| 2011 | 4  | 26 | 23 | 11 | 49.170 | 2,443.93967 | 7.72900 | 7.800  | 92  | 87 | -158 D |
| 2011 | 4  | 29 | 19 | 33 | 3.400  | 2,244.38766 | 7.32133 | 14.720 | 168 | 50 | 131 D  |
| 2011 | 4  | 29 | 23 | 19 | 32.650 | 1,444.37183 | 6.82417 | 8.580  | 267 | 82 | 139 D  |
| 2011 | 4  | 30 | 10 | 38 | 42.580 | 1,644.39317 | 7.24900 | 14.550 | 321 | 73 | -106 D |
| 2011 | 5  | 2  | 4  | 10 | 50.410 | 146.34683   | 7.43733 | 11.370 | 276 | 56 | -142 D |
| 2011 | 5  | 3  | 10 | 5  | 19.720 | 1,346.02850 | 6.88633 | 8.350  | 73  | 75 | -137 D |
| 2011 | 5  | 5  | 0  | 49 | 39.050 | 1,544.56033 | 6.96667 | 10.870 | 338 | 47 | -133 D |
| 2011 | 5  | 5  | 8  | 38 | 58.760 | 1,444.59617 | 7.21883 | 14.710 | 232 | 39 | -62 D  |
| 2011 | 5  | 5  | 17 | 29 | 16.980 | 1,944.60250 | 7.24783 | 14.870 | 159 | 54 | 115 D  |
| 2011 | 5  | 6  | 9  | 28 | 53.270 | 1,444.60266 | 7.23033 | 14.390 | 340 | 74 | -130 D |
| 2011 | 5  | 7  | 16 | 34 | 41.210 | 1,544.60250 | 7.22933 | 15.460 | 198 | 42 | -100 D |
| 2011 | 5  | 13 | 17 | 9  | 28.120 | 1,346.02217 | 7.02883 | 9.840  | 51  | 88 | 173 D  |
| 2011 | 5  | 14 | 20 | 5  | 17.830 | 1,746.24733 | 7.75900 | 10.390 | 197 | 63 | -103 D |

|      |    |    |    |    |        |     |          |         |        |     |    |        |
|------|----|----|----|----|--------|-----|----------|---------|--------|-----|----|--------|
| 2011 | 5  | 22 | 2  | 13 | 14.520 | 1,7 | 45.74117 | 6.51067 | 12.230 | 308 | 24 | -63 D  |
| 2011 | 5  | 22 | 21 | 35 | 34.810 | 1,7 | 44.48567 | 7.26883 | 15.670 | 2   | 71 | -138 D |
| 2011 | 5  | 25 | 6  | 15 | 52.140 | 1,6 | 44.59483 | 6.77550 | 9.300  | 347 | 68 | -131 D |
| 2011 | 5  | 30 | 7  | 3  | 48.500 | 1,3 | 44.75483 | 6.87750 | 11.940 | 146 | 45 | -98 D  |
| 2011 | 6  | 1  | 12 | 55 | 41.760 | 2,2 | 45.22017 | 6.38567 | 10.070 | 17  | 74 | -172 D |
| 2011 | 6  | 10 | 12 | 53 | 31.240 | 1,7 | 45.25333 | 6.55600 | 9.670  | 343 | 88 | 143 D  |
| 2011 | 6  | 15 | 3  | 37 | 53.520 | 1,6 | 44.46733 | 7.02967 | 9.580  | 298 | 88 | -162 D |
| 2011 | 6  | 15 | 17 | 21 | 17.540 | 2,2 | 44.48033 | 6.89117 | 7.940  | 114 | 77 | 154 D  |
| 2011 | 6  | 15 | 19 | 50 | 36.540 | 2   | 44.48017 | 6.88700 | 7.890  | 288 | 75 | 139 D  |
| 2011 | 6  | 16 | 1  | 52 | 50.840 | 0,8 | 46.21183 | 7.65850 | 8.070  | 102 | 41 | -111 D |
| 2011 | 6  | 16 | 17 | 33 | 7.140  | 1,1 | 44.47917 | 6.87983 | 8.440  | 187 | 13 | 2 D    |
| 2011 | 6  | 17 | 7  | 31 | 49.680 | 1,6 | 44.42800 | 6.33600 | 8.900  | 170 | 34 | -94 D  |
| 2011 | 6  | 21 | 10 | 37 | 38.040 | 1,8 | 44.68317 | 7.24600 | 15.630 | 12  | 83 | 170 D  |
| 2011 | 6  | 29 | 22 | 27 | 13.550 | 1,4 | 46.43500 | 7.03700 | 8.830  | 133 | 75 | 138 D  |
| 2011 | 7  | 4  | 18 | 35 | 21.450 | 1   | 44.72983 | 6.75417 | 6.040  | 331 | 66 | -142 D |
| 2011 | 7  | 10 | 1  | 24 | 3.840  | 1,5 | 46.24033 | 7.75950 | 11.210 | 93  | 35 | -103 D |
| 2011 | 7  | 11 | 1  | 17 | 4.980  | 1,4 | 45.13517 | 7.34183 | 11.240 | 34  | 35 | 129 D  |
| 2011 | 7  | 14 | 10 | 38 | 42.670 | 1,8 | 45.76917 | 5.87933 | 11.640 | 35  | 79 | 145 D  |
| 2011 | 7  | 15 | 3  | 29 | 2.490  | 2   | 46.21833 | 7.73883 | 10.430 | 289 | 41 | -96 C  |
| 2011 | 7  | 18 | 2  | 31 | 10.860 | 1,9 | 44.36483 | 7.30633 | 15.940 | 152 | 50 | -93 D  |
| 2011 | 7  | 23 | 16 | 56 | 53.780 | 2   | 44.98200 | 7.14250 | 14.540 | 0   | 36 | -123 D |
| 2011 | 7  | 25 | 12 | 31 | 20.200 | 4,4 | 44.99317 | 7.38583 | 16.890 | 282 | 39 | -74 B  |
| 2011 | 7  | 25 | 13 | 29 | 7.880  | 2   | 45.00183 | 7.37233 | 18.080 | 168 | 59 | -134 D |
| 2011 | 7  | 25 | 14 | 56 | 20.330 | 1,8 | 44.47933 | 6.92833 | 9.660  | 308 | 54 | -129 D |
| 2011 | 7  | 29 | 20 | 38 | 50.450 | 1   | 46.15717 | 7.20500 | 11.390 | 295 | 87 | 175 D  |
| 2011 | 8  | 14 | 3  | 22 | 32.780 | 1,8 | 44.33933 | 7.29417 | 14.870 | 25  | 42 | -127 D |
| 2011 | 8  | 19 | 17 | 27 | 45.030 | 1,4 | 46.03900 | 6.89517 | 9.010  | 246 | 77 | 172 D  |
| 2011 | 8  | 21 | 19 | 37 | 59.000 | 1,6 | 46.04167 | 6.89383 | 8.490  | 245 | 82 | 178 D  |
| 2011 | 8  | 21 | 19 | 39 | 44.290 | 2,7 | 46.03567 | 6.89433 | 8.280  | 246 | 83 | 132 D  |
| 2011 | 8  | 22 | 1  | 42 | 56.960 | 1,5 | 46.03233 | 6.89467 | 8.440  | 228 | 83 | 148 D  |
| 2011 | 8  | 22 | 11 | 20 | 34.200 | 1,6 | 44.51350 | 6.87267 | 8.730  | 95  | 78 | 145 D  |
| 2011 | 8  | 23 | 12 | 24 | 45.620 | 1,9 | 45.03500 | 7.33350 | 18.190 | 180 | 41 | -124 D |
| 2011 | 8  | 28 | 8  | 58 | 24.370 | 1,7 | 46.02717 | 6.89750 | 9.250  | 238 | 78 | -142 D |
| 2011 | 8  | 29 | 17 | 46 | 36.170 | 1,5 | 44.44433 | 6.45750 | 9.010  | 320 | 84 | -152 D |
| 2011 | 9  | 1  | 2  | 50 | 29.850 | 2,1 | 46.34450 | 8.54350 | 14.490 | 266 | 78 | -180 D |
| 2011 | 9  | 10 | 3  | 29 | 1.740  | 1,4 | 45.81000 | 6.68400 | 11.370 | 75  | 86 | -162 D |
| 2011 | 9  | 14 | 20 | 41 | 2.620  | 1,2 | 44.37233 | 6.80283 | 8.460  | 124 | 90 | -146 D |
| 2011 | 9  | 17 | 17 | 21 | 46.320 | 1,9 | 45.65950 | 6.34817 | 10.820 | 69  | 81 | 159 D  |
| 2011 | 9  | 20 | 15 | 48 | 43.730 | 1,5 | 44.61500 | 6.74517 | 9.240  | 332 | 63 | -179 D |
| 2011 | 10 | 1  | 4  | 11 | 7.110  | 1,4 | 46.16350 | 7.97383 | 11.210 | 221 | 73 | -165 D |
| 2011 | 10 | 4  | 12 | 32 | 1.730  | 1,1 | 44.72300 | 6.81050 | 10.410 | 42  | 51 | -93 D  |
| 2011 | 10 | 4  | 14 | 8  | 20.780 | 2,2 | 44.43283 | 6.87750 | 9.950  | 198 | 54 | -99 D  |
| 2011 | 10 | 8  | 12 | 3  | 25.820 | 1,9 | 46.16017 | 7.63333 | 12.880 | 73  | 79 | -157 D |
| 2011 | 10 | 11 | 3  | 38 | 13.020 | 1,6 | 45.19717 | 5.65917 | 10.670 | 93  | 82 | -138 D |
| 2011 | 10 | 17 | 21 | 41 | 51.290 | 1,5 | 46.02900 | 6.89383 | 9.180  | 244 | 52 | -148 D |
| 2011 | 10 | 17 | 22 | 8  | 2.580  | 1,8 | 46.02950 | 6.89583 | 9.100  | 237 | 83 | 174 D  |
| 2011 | 11 | 2  | 10 | 24 | 14.390 | 1,8 | 45.21300 | 5.66700 | 10.180 | 108 | 83 | -150 D |
| 2011 | 11 | 9  | 12 | 21 | 1.200  | 2,1 | 45.38483 | 6.52517 | 11.560 | 283 | 58 | -98 D  |
| 2011 | 11 | 10 | 17 | 19 | 35.800 | 2,2 | 43.86733 | 7.41883 | 9.300  | 108 | 46 | 127 D  |
| 2011 | 11 | 12 | 0  | 37 | 58.450 | 1,5 | 46.11683 | 7.42850 | 9.890  | 81  | 66 | -114 D |
| 2011 | 11 | 12 | 2  | 4  | 27.560 | 1,2 | 46.11650 | 7.43617 | 10.360 | 105 | 57 | -102 D |
| 2011 | 12 | 9  | 22 | 20 | 50.990 | 1,5 | 46.03350 | 6.89217 | 9.070  | 233 | 84 | 154 D  |
| 2011 | 12 | 10 | 12 | 4  | 36.090 | 1,8 | 44.54117 | 7.26733 | 13.640 | 204 | 52 | -97 D  |

|      |    |    |    |    |        |     |          |         |        |     |    |        |
|------|----|----|----|----|--------|-----|----------|---------|--------|-----|----|--------|
| 2011 | 12 | 14 | 9  | 43 | 21.240 | 2,3 | 44.42050 | 7.36217 | 9.390  | 267 | 77 | 136 D  |
| 2011 | 12 | 21 | 7  | 37 | 14.050 | 1,9 | 44.46567 | 6.76650 | 9.460  | 141 | 77 | -136 D |
| 2011 | 12 | 24 | 12 | 33 | 33.560 | 1,2 | 44.54033 | 6.68983 | 10.070 | 14  | 48 | -142 D |
| 2011 | 12 | 25 | 1  | 26 | 35.660 | 1,8 | 45.86533 | 7.51517 | 10.790 | 105 | 50 | -77 D  |
| 2011 | 12 | 29 | 6  | 5  | 56.570 | 1   | 44.57417 | 6.74750 | 10.710 | 288 | 28 | -142 D |
| 2011 | 12 | 30 | 23 | 21 | 26.660 | 2   | 44.41950 | 7.27750 | 16.200 | 128 | 77 | 123 D  |
| 2012 | 1  | 1  | 9  | 35 | 12.400 | 2,3 | 46.20650 | 6.42667 | 7.210  | 23  | 89 | 155 D  |
| 2012 | 1  | 1  | 11 | 51 | 27.830 | 0,9 | 46.31384 | 7.51433 | 12.450 | 93  | 89 | 179 D  |
| 2012 | 1  | 1  | 17 | 16 | 57.130 | 2,5 | 46.70850 | 9.74867 | 12.080 | 333 | 48 | -132 D |
| 2012 | 1  | 5  | 4  | 40 | 30.810 | 1,6 | 46.04317 | 7.70600 | 10.600 | 300 | 82 | -144 D |
| 2012 | 1  | 5  | 21 | 17 | 2.270  | 1,3 | 46.29400 | 7.21317 | 11.590 | 85  | 90 | -173 D |
| 2012 | 1  | 6  | 17 | 9  | 18.790 | 1,2 | 46.29933 | 7.20417 | 11.780 | 260 | 33 | -153 D |
| 2012 | 1  | 13 | 3  | 18 | 50.610 | 1,7 | 44.50733 | 7.24883 | 16.130 | 220 | 46 | -85 D  |
| 2012 | 1  | 14 | 18 | 29 | 32.790 | 2,1 | 44.42083 | 7.27700 | 15.330 | 214 | 41 | -113 D |
| 2012 | 1  | 16 | 15 | 12 | 36.320 | 1,5 | 44.54016 | 6.82450 | 9.350  | 342 | 87 | -169 D |
| 2012 | 1  | 22 | 10 | 40 | 45.750 | 1,9 | 44.20133 | 6.80133 | 7.210  | 143 | 79 | 101 D  |
| 2012 | 2  | 1  | 20 | 27 | 8.190  | 1,6 | 45.72467 | 6.91900 | 11.650 | 269 | 48 | -98 D  |
| 2012 | 2  | 17 | 17 | 59 | 45.490 | 1,7 | 45.72967 | 7.00033 | 12.070 | 211 | 77 | -139 C |
| 2012 | 2  | 24 | 6  | 59 | 54.780 | 1,4 | 44.97550 | 7.00750 | 14.210 | 225 | 48 | -99 D  |
| 2012 | 2  | 24 | 18 | 51 | 8.600  | 1,8 | 45.42500 | 6.58417 | 10.350 | 249 | 47 | -107 D |
| 2012 | 2  | 24 | 19 | 13 | 50.390 | 0,8 | 44.50683 | 6.69017 | 11.320 | 234 | 34 | -103 D |
| 2012 | 2  | 24 | 20 | 24 | 58.180 | 0,9 | 44.51283 | 6.69250 | 11.090 | 300 | 26 | -74 D  |
| 2012 | 2  | 26 | 0  | 49 | 11.090 | 1,6 | 44.60117 | 6.76667 | 8.700  | 332 | 56 | -170 D |
| 2012 | 2  | 26 | 22 | 37 | 55.270 | 4,3 | 44.51250 | 6.71083 | 8.510  | 354 | 46 | -101 C |
| 2012 | 2  | 26 | 22 | 50 | 32.670 | 1,3 | 44.50517 | 6.70833 | 10.130 | 3   | 81 | 160 D  |
| 2012 | 2  | 26 | 23 | 21 | 13.680 | 1,3 | 44.50017 | 6.70767 | 11.610 | 219 | 30 | -130 D |
| 2012 | 2  | 26 | 23 | 39 | 34.260 | 3,4 | 44.50134 | 6.70650 | 9.890  | 226 | 62 | -107 D |
| 2012 | 2  | 27 | 0  | 36 | 40.070 | 1,1 | 44.51300 | 6.68750 | 11.510 | 201 | 86 | -138 D |
| 2012 | 2  | 27 | 0  | 48 | 52.410 | 1,9 | 44.49950 | 6.71200 | 9.950  | 221 | 64 | -120 D |
| 2012 | 2  | 27 | 7  | 11 | 26.030 | 2,7 | 44.50583 | 6.71917 | 9.290  | 175 | 79 | -160 D |
| 2012 | 2  | 27 | 16 | 31 | 20.980 | 3,4 | 44.49833 | 6.71117 | 9.850  | 52  | 30 | -84 D  |
| 2012 | 2  | 27 | 17 | 17 | 28.660 | 1,4 | 44.50083 | 6.70700 | 10.090 | 190 | 70 | -137 D |
| 2012 | 2  | 27 | 23 | 5  | 26.870 | 2,3 | 44.50600 | 6.70600 | 10.030 | 7   | 74 | 168 D  |
| 2012 | 2  | 28 | 3  | 20 | 11.460 | 2   | 44.50667 | 6.71000 | 10.180 | 57  | 31 | -80 D  |
| 2012 | 2  | 28 | 7  | 19 | 37.170 | 1,2 | 44.50017 | 6.71083 | 10.100 | 216 | 89 | 125 D  |
| 2012 | 2  | 28 | 9  | 1  | 1.400  | 2,3 | 44.50033 | 6.71850 | 10.130 | 211 | 69 | -131 D |
| 2012 | 2  | 28 | 9  | 2  | 24.230 | 1,3 | 44.49866 | 6.70050 | 10.770 | 147 | 22 | -80 D  |
| 2012 | 2  | 28 | 9  | 46 | 15.180 | 1,3 | 44.49866 | 6.70750 | 10.830 | 33  | 76 | -110 D |
| 2012 | 2  | 28 | 17 | 9  | 31.780 | 1,2 | 44.49383 | 6.70133 | 10.850 | 34  | 33 | -106 D |
| 2012 | 2  | 29 | 8  | 45 | 18.530 | 1,6 | 44.49900 | 6.70833 | 10.100 | 222 | 63 | -103 D |
| 2012 | 2  | 29 | 10 | 28 | 39.290 | 1,1 | 44.49850 | 6.70067 | 11.370 | 178 | 43 | 109 D  |
| 2012 | 2  | 29 | 17 | 21 | 7.760  | 1,3 | 44.49917 | 6.69983 | 10.660 | 213 | 87 | -128 D |
| 2012 | 3  | 1  | 17 | 18 | 7.280  | 0,9 | 44.51167 | 6.69933 | 10.790 | 360 | 80 | -158 D |
| 2012 | 3  | 1  | 17 | 44 | 49.150 | 1,6 | 44.50450 | 6.70233 | 10.760 | 359 | 87 | 172 D  |
| 2012 | 3  | 2  | 7  | 15 | 50.260 | 3,6 | 44.49283 | 6.71117 | 10.820 | 231 | 67 | -94 C  |
| 2012 | 3  | 2  | 11 | 41 | 44.940 | 1,9 | 44.49866 | 6.71133 | 10.040 | 165 | 82 | -128 D |
| 2012 | 3  | 2  | 11 | 47 | 54.220 | 0,8 | 44.49750 | 6.70133 | 9.400  | 19  | 83 | 136 D  |
| 2012 | 3  | 2  | 21 | 51 | 17.920 | 1,9 | 44.49917 | 6.70900 | 10.660 | 348 | 78 | 156 D  |
| 2012 | 3  | 3  | 2  | 9  | 18.820 | 1,3 | 44.49333 | 6.70917 | 10.100 | 5   | 86 | 162 D  |
| 2012 | 3  | 3  | 4  | 15 | 35.280 | 1,2 | 44.49783 | 6.70833 | 10.160 | 179 | 87 | -152 D |
| 2012 | 3  | 3  | 8  | 0  | 4.400  | 1,5 | 44.49800 | 6.70883 | 10.090 | 174 | 88 | -161 D |
| 2012 | 3  | 3  | 12 | 23 | 42.010 | 1,1 | 44.51266 | 6.69217 | 9.550  | 291 | 57 | 125 D  |
| 2012 | 3  | 3  | 19 | 45 | 39.550 | 2,3 | 44.13567 | 6.88283 | 5.760  | 14  | 51 | 75 D   |

|      |   |    |    |           |              |         |        |     |    |        |
|------|---|----|----|-----------|--------------|---------|--------|-----|----|--------|
| 2012 | 3 | 3  | 20 | 48 25.710 | 1,8 44.49817 | 6.70967 | 10.770 | 218 | 66 | -108 D |
| 2012 | 3 | 4  | 8  | 4 28.510  | 1,5 44.51950 | 6.70183 | 11.550 | 91  | 45 | -87 D  |
| 2012 | 3 | 4  | 10 | 19 45.090 | 1,4 44.49300 | 6.70217 | 10.690 | 191 | 76 | -150 D |
| 2012 | 3 | 4  | 17 | 48 50.050 | 1 44.51800   | 6.71067 | 10.750 | 211 | 81 | -105 D |
| 2012 | 3 | 5  | 14 | 56 48.880 | 2,8 44.51367 | 6.69367 | 8.080  | 344 | 27 | -131 D |
| 2012 | 3 | 5  | 16 | 27 22.380 | 1,7 44.51283 | 6.68367 | 9.950  | 319 | 86 | 131 D  |
| 2012 | 3 | 5  | 16 | 34 49.890 | 2,3 44.51800 | 6.69267 | 10.080 | 326 | 87 | 172 D  |
| 2012 | 3 | 6  | 9  | 27 1.010  | 2,1 44.51250 | 6.68433 | 9.370  | 337 | 85 | 179 D  |
| 2012 | 3 | 6  | 12 | 9 46.270  | 1,3 44.51250 | 6.68767 | 10.090 | 304 | 70 | 123 D  |
| 2012 | 3 | 6  | 17 | 44 3.710  | 1,8 44.50583 | 6.69817 | 10.340 | 1   | 82 | 179 D  |
| 2012 | 3 | 7  | 23 | 30 18.240 | 3,2 44.50800 | 6.68950 | 10.120 | 335 | 89 | 162 C  |
| 2012 | 3 | 8  | 2  | 10 50.420 | 1,3 44.50683 | 6.69100 | 10.850 | 99  | 47 | 102 D  |
| 2012 | 3 | 8  | 2  | 28 46.500 | 1,9 44.51483 | 6.69633 | 10.150 | 145 | 89 | -148 D |
| 2012 | 3 | 8  | 4  | 54 31.360 | 1,4 44.51417 | 6.69067 | 10.220 | 127 | 74 | -163 D |
| 2012 | 3 | 8  | 14 | 19 42.640 | 1,5 44.51350 | 6.69767 | 10.810 | 295 | 70 | 174 D  |
| 2012 | 3 | 8  | 15 | 24 31.550 | 1,3 44.51917 | 6.69867 | 10.170 | 141 | 80 | -167 D |
| 2012 | 3 | 8  | 18 | 26 21.550 | 3 44.49300   | 6.70917 | 10.100 | 347 | 87 | 152 D  |
| 2012 | 3 | 8  | 18 | 43 52.590 | 1,3 44.49733 | 6.70967 | 10.160 | 7   | 79 | -180 D |
| 2012 | 3 | 9  | 6  | 17 59.000 | 1,3 44.51283 | 6.69133 | 10.630 | 353 | 80 | -171 D |
| 2012 | 3 | 9  | 6  | 59 33.080 | 2,2 44.51283 | 6.69317 | 9.960  | 141 | 72 | -146 D |
| 2012 | 3 | 10 | 8  | 14 31.690 | 1,9 44.49317 | 6.70933 | 10.230 | 352 | 88 | 165 D  |
| 2012 | 3 | 10 | 17 | 11 40.420 | 1 44.49200   | 6.70950 | 11.370 | 6   | 80 | 157 D  |
| 2012 | 3 | 10 | 20 | 42 50.410 | 1,4 44.50633 | 6.70200 | 10.250 | 199 | 39 | 167 D  |
| 2012 | 3 | 11 | 16 | 58 29.140 | 1,2 44.49850 | 6.70117 | 10.250 | 185 | 71 | -174 D |
| 2012 | 3 | 11 | 18 | 2 23.540  | 1,4 46.24434 | 7.70233 | 10.450 | 67  | 61 | -153 D |
| 2012 | 3 | 12 | 3  | 52 28.030 | 1,6 44.49166 | 6.70917 | 10.550 | 142 | 90 | -136 D |
| 2012 | 3 | 12 | 5  | 23 42.770 | 1 44.49933   | 6.70000 | 10.810 | 345 | 84 | 177 D  |
| 2012 | 3 | 12 | 21 | 59 3.340  | 0,8 44.49717 | 6.69733 | 10.600 | 184 | 88 | -174 D |
| 2012 | 3 | 13 | 0  | 48 40.060 | 1 44.51400   | 6.69383 | 10.120 | 101 | 90 | -177 D |
| 2012 | 3 | 13 | 22 | 44 33.310 | 1,2 44.49800 | 6.70250 | 11.080 | 331 | 74 | 147 D  |
| 2012 | 3 | 14 | 7  | 3 37.030  | 2,8 44.51167 | 6.69250 | 9.420  | 150 | 80 | -158 D |
| 2012 | 3 | 14 | 8  | 1 40.130  | 2 44.51183   | 6.70150 | 10.150 | 323 | 81 | 147 D  |
| 2012 | 3 | 14 | 8  | 30 35.060 | 1,5 44.51017 | 6.69033 | 10.090 | 161 | 89 | -180 D |
| 2012 | 3 | 15 | 1  | 21 41.630 | 0,7 44.50750 | 6.67367 | 8.330  | 245 | 31 | 131 D  |
| 2012 | 3 | 15 | 3  | 38 22.060 | 0,7 44.51350 | 6.68117 | 8.460  | 313 | 73 | 127 D  |
| 2012 | 3 | 15 | 5  | 31 33.140 | 0,7 44.49866 | 6.70067 | 10.200 | 343 | 88 | 142 D  |
| 2012 | 3 | 15 | 5  | 47 42.350 | 1 44.49917   | 6.70017 | 10.010 | 163 | 87 | -140 D |
| 2012 | 3 | 15 | 10 | 0 18.390  | 1,4 44.51300 | 6.69033 | 10.140 | 192 | 12 | 153 D  |
| 2012 | 3 | 15 | 17 | 14 36.090 | 1 44.49350   | 6.70100 | 10.890 | 11  | 88 | 117 D  |
| 2012 | 3 | 15 | 19 | 27 54.230 | 1,2 44.51217 | 6.68200 | 9.870  | 251 | 45 | 137 D  |
| 2012 | 3 | 15 | 21 | 45 23.500 | 1,8 44.49850 | 6.70867 | 10.170 | 174 | 77 | -123 D |
| 2012 | 3 | 15 | 22 | 52 32.220 | 0,8 44.49200 | 6.70200 | 10.730 | 193 | 79 | -107 D |
| 2012 | 3 | 16 | 0  | 23 1.160  | 1,4 44.51233 | 6.68267 | 10.040 | 319 | 83 | 133 D  |
| 2012 | 3 | 16 | 1  | 32 40.630 | 1,4 44.51217 | 6.68850 | 10.100 | 322 | 87 | -179 D |
| 2012 | 3 | 16 | 2  | 22 55.060 | 1,3 44.50733 | 6.68850 | 10.180 | 338 | 87 | 164 D  |
| 2012 | 3 | 16 | 4  | 26 32.690 | 0,5 44.51167 | 6.67333 | 8.500  | 303 | 66 | -176 D |
| 2012 | 3 | 16 | 16 | 29 2.400  | 1,1 44.50617 | 6.67483 | 10.060 | 312 | 51 | 136 D  |
| 2012 | 3 | 16 | 16 | 56 28.620 | 1,1 44.49950 | 6.70633 | 10.770 | 180 | 90 | -138 D |
| 2012 | 3 | 16 | 23 | 0 47.730  | 1,3 44.58950 | 7.24767 | 17.860 | 160 | 66 | 151 D  |
| 2012 | 3 | 18 | 21 | 59 12.290 | 1,1 44.49933 | 6.69167 | 10.080 | 214 | 52 | -108 D |
| 2012 | 3 | 19 | 10 | 9 9.590   | 1,3 44.49017 | 6.68950 | 10.070 | 180 | 85 | -148 D |
| 2012 | 3 | 19 | 15 | 50 22.480 | 0,8 44.49967 | 6.68883 | 8.650  | 1   | 82 | -156 D |
| 2012 | 3 | 19 | 21 | 34 2.640  | 1,6 44.49333 | 6.69167 | 10.120 | 177 | 62 | -142 C |

|      |   |    |    |           |              |         |        |     |    |        |
|------|---|----|----|-----------|--------------|---------|--------|-----|----|--------|
| 2012 | 3 | 20 | 5  | 13 0.460  | 1,7 44.51350 | 6.68817 | 9.600  | 163 | 84 | -158 D |
| 2012 | 3 | 20 | 6  | 37 50.050 | 1,4 44.51200 | 6.68900 | 10.240 | 305 | 84 | -174 D |
| 2012 | 3 | 20 | 21 | 12 39.840 | 1,5 44.62333 | 7.25567 | 14.970 | 200 | 82 | -161 D |
| 2012 | 3 | 21 | 5  | 7 3.720   | 1,1 44.51150 | 6.68350 | 10.100 | 187 | 59 | -131 D |
| 2012 | 3 | 21 | 7  | 10 59.750 | 1,1 44.49817 | 6.70150 | 10.840 | 186 | 73 | -133 D |
| 2012 | 3 | 22 | 17 | 57 24.710 | 1,9 44.51300 | 6.69100 | 10.350 | 346 | 84 | 173 D  |
| 2012 | 3 | 22 | 18 | 20 26.830 | 1,2 44.49400 | 6.70033 | 10.920 | 160 | 82 | -153 D |
| 2012 | 3 | 22 | 20 | 26 54.710 | 1,3 44.51933 | 6.69833 | 10.200 | 126 | 73 | -168 D |
| 2012 | 3 | 23 | 17 | 17 32.190 | 0,8 44.48633 | 6.70117 | 10.780 | 179 | 88 | -154 D |
| 2012 | 3 | 24 | 17 | 24 47.210 | 0,9 44.51283 | 6.70800 | 10.050 | 219 | 65 | -62 D  |
| 2012 | 3 | 25 | 1  | 30 55.780 | 0,9 44.50667 | 6.68883 | 12.300 | 24  | 27 | -132 D |
| 2012 | 3 | 25 | 8  | 5 30.080  | 3,4 44.49200 | 6.71000 | 10.060 | 335 | 90 | 135 B  |
| 2012 | 3 | 25 | 8  | 26 41.630 | 0,9 44.49400 | 6.71100 | 10.240 | 358 | 74 | 116 D  |
| 2012 | 3 | 25 | 9  | 40 1.310  | 1,1 44.49866 | 6.70667 | 10.780 | 350 | 84 | 162 D  |
| 2012 | 3 | 25 | 18 | 2 36.590  | 1 44.52083   | 6.69917 | 10.350 | 312 | 89 | -177 D |
| 2012 | 3 | 25 | 20 | 0 30.390  | 1,2 44.51250 | 6.69083 | 10.180 | 165 | 88 | -172 D |
| 2012 | 3 | 25 | 20 | 35 43.240 | 1,6 44.51867 | 6.70617 | 10.210 | 155 | 89 | -162 D |
| 2012 | 3 | 25 | 21 | 9 21.050  | 2,2 44.51917 | 6.71217 | 9.490  | 154 | 84 | -175 D |
| 2012 | 3 | 26 | 6  | 28 26.560 | 2,3 44.27067 | 7.27667 | 13.620 | 287 | 60 | -178 D |
| 2012 | 3 | 26 | 20 | 11 30.890 | 2,7 44.50500 | 6.69133 | 10.150 | 146 | 74 | -149 D |
| 2012 | 3 | 26 | 23 | 31 34.120 | 1,1 44.50566 | 6.68383 | 10.330 | 149 | 76 | -149 D |
| 2012 | 3 | 27 | 7  | 30 49.340 | 1,2 44.51283 | 6.68900 | 10.340 | 313 | 78 | 133 D  |
| 2012 | 3 | 27 | 17 | 37 5.290  | 0,8 44.49333 | 6.70133 | 11.020 | 181 | 75 | -147 D |
| 2012 | 3 | 28 | 16 | 15 4.620  | 1,3 44.49217 | 6.70950 | 10.750 | 183 | 50 | -104 D |
| 2012 | 3 | 29 | 2  | 43 51.080 | 0,7 44.50533 | 6.69683 | 10.900 | 327 | 88 | 141 D  |
| 2012 | 3 | 29 | 4  | 54 55.310 | 1,3 44.49933 | 6.68950 | 10.310 | 133 | 89 | -136 D |
| 2012 | 3 | 29 | 11 | 17 42.840 | 0,8 46.17933 | 6.95117 | 9.640  | 305 | 44 | -104 D |
| 2012 | 3 | 30 | 11 | 30 44.850 | 1,4 46.22733 | 7.66117 | 10.320 | 269 | 19 | -19 D  |
| 2012 | 3 | 30 | 14 | 58 2.940  | 0,9 44.48533 | 6.71050 | 10.120 | 192 | 56 | -168 D |
| 2012 | 3 | 31 | 3  | 58 39.290 | 1,1 44.50050 | 6.69800 | 10.090 | 356 | 87 | 162 D  |
| 2012 | 3 | 31 | 22 | 53 6.850  | 1,1 45.39667 | 6.53533 | 12.530 | 296 | 28 | -91 D  |
| 2012 | 4 | 2  | 21 | 27 30.080 | 1,1 44.49217 | 6.70933 | 10.680 | 148 | 84 | -144 D |
| 2012 | 4 | 3  | 2  | 45 3.140  | 2,1 46.23167 | 7.65950 | 9.000  | 79  | 83 | -148 D |
| 2012 | 4 | 3  | 2  | 47 31.690 | 1,2 46.22483 | 7.65900 | 10.310 | 35  | 86 | -131 D |
| 2012 | 4 | 3  | 3  | 39 57.110 | 2,4 44.51117 | 6.70983 | 10.680 | 339 | 89 | 168 C  |
| 2012 | 4 | 3  | 23 | 45 17.170 | 1,8 45.38517 | 7.35133 | 15.100 | 75  | 79 | 126 D  |
| 2012 | 4 | 5  | 12 | 5 34.420  | 1,1 44.48550 | 6.72050 | 9.870  | 62  | 41 | -100 D |
| 2012 | 4 | 5  | 19 | 30 6.410  | 1,8 46.06233 | 7.91283 | 12.020 | 299 | 36 | 150 D  |
| 2012 | 4 | 6  | 6  | 34 35.280 | 1,6 46.08950 | 7.51750 | 9.420  | 228 | 87 | 173 D  |
| 2012 | 4 | 6  | 21 | 33 37.680 | 0,9 44.49033 | 6.70133 | 10.320 | 134 | 58 | -153 D |
| 2012 | 4 | 7  | 12 | 59 16.120 | 1,7 45.45433 | 6.64200 | 9.590  | 189 | 67 | -115 C |
| 2012 | 4 | 9  | 1  | 22 3.290  | 0,8 44.51217 | 6.68400 | 9.980  | 103 | 72 | -164 D |
| 2012 | 4 | 9  | 21 | 7 13.750  | 2,2 46.63433 | 8.09383 | 9.840  | 145 | 67 | 135 D  |
| 2012 | 4 | 10 | 10 | 34 29.940 | 1,5 44.46983 | 6.37633 | 10.610 | 2   | 42 | -98 D  |
| 2012 | 4 | 10 | 10 | 39 42.440 | 1,4 44.53817 | 6.85883 | 10.030 | 310 | 62 | -178 D |
| 2012 | 4 | 10 | 20 | 29 31.960 | 1,9 44.49367 | 6.69933 | 10.880 | 173 | 69 | -154 C |
| 2012 | 4 | 12 | 2  | 10 23.860 | 2,1 46.60883 | 8.40017 | 12.550 | 159 | 56 | -85 D  |
| 2012 | 4 | 14 | 13 | 43 17.350 | 1,4 44.67017 | 7.23100 | 13.510 | 172 | 80 | 154 D  |
| 2012 | 4 | 14 | 20 | 51 29.330 | 1 44.48567   | 6.70217 | 10.820 | 325 | 3  | 38 D   |
| 2012 | 4 | 14 | 21 | 17 29.790 | 2 44.61550   | 7.24567 | 15.030 | 53  | 34 | -111 D |
| 2012 | 4 | 14 | 23 | 14 50.990 | 1,1 44.48567 | 6.70150 | 10.790 | 190 | 60 | 163 D  |
| 2012 | 4 | 16 | 17 | 24 42.190 | 1 46.19667   | 6.95133 | 8.660  | 100 | 66 | -105 D |
| 2012 | 4 | 17 | 3  | 37 14.030 | 1,2 44.48650 | 6.70083 | 10.800 | 235 | 53 | -96 D  |

|      |   |    |    |    |        |     |          |         |        |     |    |        |
|------|---|----|----|----|--------|-----|----------|---------|--------|-----|----|--------|
| 2012 | 4 | 18 | 13 | 5  | 21.530 | 2,5 | 44.95100 | 8.12650 | 57.010 | 84  | 89 | 155 D  |
| 2012 | 4 | 19 | 17 | 30 | 1.800  | 1,6 | 44.55433 | 7.24817 | 14.630 | 328 | 50 | -93 D  |
| 2012 | 4 | 20 | 4  | 57 | 33.370 | 2,5 | 44.49250 | 6.71100 | 10.160 | 356 | 84 | 163 D  |
| 2012 | 4 | 20 | 5  | 35 | 50.120 | 1,7 | 44.48817 | 6.70650 | 10.810 | 185 | 76 | -160 C |
| 2012 | 4 | 20 | 9  | 51 | 27.450 | 1,2 | 44.48600 | 6.70817 | 10.780 | 195 | 36 | 114 D  |
| 2012 | 4 | 20 | 13 | 45 | 16.070 | 1,1 | 44.48633 | 6.70083 | 10.790 | 175 | 73 | -141 D |
| 2012 | 4 | 21 | 7  | 24 | 27.610 | 1,2 | 44.47850 | 6.69250 | 11.480 | 202 | 69 | -172 D |
| 2012 | 4 | 22 | 7  | 20 | 50.850 | 1,2 | 44.48633 | 6.70183 | 10.940 | 61  | 23 | -49 D  |
| 2012 | 4 | 22 | 8  | 34 | 1.220  | 1,2 | 44.48517 | 6.70083 | 10.860 | 185 | 85 | -176 D |
| 2012 | 4 | 22 | 20 | 59 | 42.650 | 1,2 | 44.50750 | 6.69883 | 10.920 | 326 | 84 | 140 D  |
| 2012 | 4 | 23 | 0  | 29 | 10.400 | 1,4 | 44.49267 | 6.70633 | 10.840 | 280 | 56 | 103 D  |
| 2012 | 4 | 24 | 6  | 15 | 0.420  | 1,5 | 44.48583 | 6.69733 | 10.740 | 233 | 40 | 135 D  |
| 2012 | 4 | 26 | 2  | 6  | 31.720 | 1,7 | 44.44083 | 7.28300 | 16.850 | 4   | 69 | -81 D  |
| 2012 | 4 | 27 | 15 | 26 | 16.560 | 1,2 | 44.49300 | 6.69933 | 10.940 | 319 | 86 | 131 D  |
| 2012 | 4 | 28 | 16 | 6  | 18.600 | 1,4 | 44.48500 | 6.70050 | 11.310 | 334 | 76 | 159 D  |
| 2012 | 4 | 28 | 18 | 15 | 11.980 | 1,8 | 46.60817 | 8.39983 | 12.620 | 320 | 46 | -92 D  |
| 2012 | 4 | 28 | 22 | 30 | 37.700 | 1,8 | 46.25067 | 7.86633 | 9.250  | 282 | 68 | -113 D |
| 2012 | 4 | 29 | 1  | 30 | 20.090 | 1,8 | 44.49166 | 6.71150 | 10.100 | 134 | 83 | -163 D |
| 2012 | 5 | 2  | 7  | 21 | 52.290 | 1,3 | 44.49850 | 6.70033 | 10.870 | 173 | 75 | -129 D |
| 2012 | 5 | 2  | 7  | 26 | 13.570 | 2,1 | 44.49817 | 6.71083 | 10.110 | 161 | 88 | -151 D |
| 2012 | 5 | 2  | 10 | 52 | 33.570 | 1,4 | 44.49800 | 6.69750 | 10.800 | 182 | 86 | -158 D |
| 2012 | 5 | 2  | 10 | 59 | 22.710 | 1   | 44.49783 | 6.69883 | 10.780 | 186 | 85 | -147 D |
| 2012 | 5 | 2  | 16 | 25 | 32.150 | 0,8 | 44.51300 | 6.70000 | 10.780 | 146 | 89 | 172 D  |
| 2012 | 5 | 3  | 2  | 38 | 21.510 | 1,1 | 44.63033 | 7.25433 | 17.140 | 199 | 79 | -174 D |
| 2012 | 5 | 4  | 21 | 13 | 16.610 | 2,2 | 44.49417 | 6.71583 | 10.090 | 177 | 76 | -146 D |
| 2012 | 5 | 4  | 21 | 25 | 46.910 | 1,2 | 44.49233 | 6.70350 | 10.820 | 150 | 88 | -130 D |
| 2012 | 5 | 5  | 20 | 50 | 15.040 | 1,2 | 44.51767 | 6.69867 | 10.020 | 137 | 61 | 170 D  |
| 2012 | 5 | 9  | 7  | 7  | 3.860  | 0,9 | 44.48100 | 6.70033 | 10.850 | 194 | 55 | -173 D |
| 2012 | 5 | 10 | 18 | 55 | 41.190 | 2   | 44.49166 | 6.71767 | 10.090 | 134 | 70 | 157 D  |
| 2012 | 5 | 11 | 4  | 10 | 23.190 | 1,3 | 44.48433 | 6.70683 | 9.970  | 225 | 68 | -100 D |
| 2012 | 5 | 12 | 5  | 13 | 31.940 | 1,5 | 46.22000 | 7.77700 | 13.430 | 229 | 90 | 129 D  |
| 2012 | 5 | 12 | 14 | 56 | 4.700  | 1,4 | 44.65450 | 6.85700 | 9.530  | 297 | 83 | -138 D |
| 2012 | 5 | 14 | 2  | 34 | 50.380 | 1,4 | 44.48533 | 6.70183 | 10.630 | 167 | 89 | -152 D |
| 2012 | 5 | 16 | 15 | 26 | 28.790 | 1,6 | 46.31317 | 7.53433 | 11.790 | 113 | 74 | -180 D |
| 2012 | 5 | 16 | 18 | 34 | 25.950 | 1,3 | 46.31933 | 7.52550 | 12.430 | 259 | 90 | 142 D  |
| 2012 | 5 | 20 | 22 | 45 | 51.270 | 2,6 | 45.71083 | 7.83283 | 10.160 | 21  | 85 | 167 D  |
| 2012 | 5 | 23 | 4  | 11 | 10.970 | 1,2 | 44.48650 | 6.71233 | 10.140 | 342 | 87 | 172 D  |
| 2012 | 5 | 24 | 0  | 34 | 29.620 | 1,6 | 44.48650 | 6.71667 | 10.260 | 169 | 73 | -123 D |
| 2012 | 5 | 24 | 6  | 39 | 27.110 | 1   | 44.49900 | 6.70050 | 11.440 | 286 | 42 | 155 D  |
| 2012 | 5 | 24 | 14 | 2  | 42.400 | 1,4 | 44.49050 | 6.70817 | 10.910 | 359 | 89 | 166 D  |
| 2012 | 5 | 25 | 0  | 0  | 47.000 | 1   | 44.49283 | 6.71017 | 10.700 | 154 | 85 | -139 D |
| 2012 | 5 | 25 | 12 | 50 | 59.200 | 2,7 | 45.26683 | 6.56600 | 9.140  | 344 | 80 | 156 D  |
| 2012 | 5 | 25 | 15 | 28 | 2.550  | 1,8 | 44.62133 | 7.25833 | 17.430 | 148 | 90 | -140 D |
| 2012 | 5 | 26 | 16 | 32 | 29.800 | 1,4 | 44.47817 | 6.71667 | 10.670 | 354 | 84 | 147 D  |
| 2012 | 5 | 26 | 17 | 18 | 31.540 | 2,5 | 44.51283 | 6.71167 | 10.200 | 330 | 68 | -135 D |
| 2012 | 5 | 27 | 3  | 23 | 38.100 | 1,4 | 44.48500 | 6.72633 | 10.180 | 178 | 80 | -160 D |
| 2012 | 5 | 28 | 14 | 39 | 37.840 | 1   | 44.49083 | 6.71133 | 10.310 | 333 | 76 | 154 D  |
| 2012 | 5 | 29 | 13 | 1  | 35.300 | 1,2 | 44.48417 | 6.70317 | 11.420 | 1   | 89 | 99 D   |
| 2012 | 5 | 30 | 2  | 3  | 59.860 | 1,8 | 44.48750 | 6.70983 | 10.220 | 174 | 89 | -161 D |
| 2012 | 5 | 30 | 5  | 57 | 20.570 | 2,2 | 44.50100 | 6.71883 | 10.200 | 12  | 56 | -82 D  |
| 2012 | 5 | 30 | 8  | 27 | 20.990 | 1,4 | 44.51033 | 6.68883 | 10.080 | 100 | 44 | 171 D  |
| 2012 | 5 | 30 | 16 | 49 | 9.100  | 2,3 | 44.75050 | 6.71833 | 7.550  | 324 | 75 | 139 D  |
| 2012 | 5 | 30 | 16 | 51 | 23.590 | 2,1 | 44.75050 | 6.72500 | 6.620  | 348 | 87 | 179 D  |



|      |   |    |    |    |        |     |          |         |        |     |    |        |
|------|---|----|----|----|--------|-----|----------|---------|--------|-----|----|--------|
| 2012 | 5 | 30 | 21 | 20 | 27.000 | 1,3 | 44.51850 | 6.70850 | 10.110 | 135 | 57 | 177 D  |
| 2012 | 5 | 31 | 1  | 42 | 6.230  | 0,4 | 44.49883 | 6.69900 | 10.830 | 123 | 26 | 165 D  |
| 2012 | 5 | 31 | 9  | 33 | 40.530 | 1,8 | 45.19917 | 5.66783 | 10.830 | 249 | 87 | 175 D  |
| 2012 | 6 | 2  | 18 | 3  | 34.570 | 1,5 | 44.49983 | 6.70983 | 10.680 | 359 | 67 | -96 D  |
| 2012 | 6 | 3  | 5  | 23 | 22.410 | 2   | 44.51350 | 6.88133 | 9.540  | 41  | 38 | -113 D |
| 2012 | 6 | 4  | 7  | 19 | 19.050 | 1,8 | 46.26933 | 8.11733 | 9.940  | 165 | 45 | -96 D  |
| 2012 | 6 | 6  | 0  | 7  | 6.310  | 1,8 | 46.33200 | 7.28283 | 9.520  | 286 | 90 | -161 D |
| 2012 | 6 | 6  | 16 | 46 | 45.420 | 1,4 | 44.48683 | 6.71133 | 10.240 | 159 | 86 | -146 D |
| 2012 | 6 | 6  | 20 | 2  | 39.500 | 1,3 | 44.51917 | 6.70300 | 10.140 | 142 | 71 | 167 D  |
| 2012 | 6 | 7  | 6  | 21 | 31.650 | 1,3 | 44.51283 | 6.69067 | 10.180 | 110 | 57 | 104 D  |
| 2012 | 6 | 14 | 18 | 39 | 43.980 | 1,9 | 46.14283 | 7.04967 | 10.440 | 84  | 49 | -118 D |
| 2012 | 6 | 17 | 11 | 20 | 36.730 | 2,5 | 45.94133 | 6.11050 | 5.440  | 45  | 84 | -143 D |
| 2012 | 6 | 17 | 17 | 56 | 16.040 | 1,6 | 44.49783 | 6.71233 | 10.160 | 234 | 47 | -92 D  |
| 2012 | 6 | 17 | 20 | 6  | 48.250 | 1,3 | 44.49250 | 6.71317 | 10.080 | 48  | 60 | -99 D  |
| 2012 | 6 | 18 | 4  | 49 | 27.490 | 1,2 | 44.49917 | 6.70017 | 10.600 | 208 | 17 | -117 D |
| 2012 | 6 | 20 | 17 | 53 | 45.230 | 1,3 | 44.49983 | 6.69933 | 10.920 | 89  | 74 | -88 D  |
| 2012 | 6 | 21 | 13 | 20 | 43.500 | 1,9 | 44.50000 | 6.69917 | 11.400 | 329 | 88 | -157 D |
| 2012 | 6 | 23 | 22 | 54 | 34.570 | 0,8 | 44.47917 | 6.70283 | 10.800 | 268 | 81 | 147 D  |
| 2012 | 7 | 3  | 21 | 50 | 3.290  | 1,4 | 44.48633 | 6.70883 | 10.240 | 185 | 73 | -159 D |
| 2012 | 7 | 4  | 21 | 11 | 15.920 | 2   | 44.71583 | 6.67000 | 4.910  | 176 | 51 | -179 D |
| 2012 | 7 | 4  | 22 | 18 | 0.220  | 1,3 | 44.72033 | 6.63100 | 8.020  | 311 | 82 | 124 D  |
| 2012 | 7 | 6  | 11 | 25 | 17.120 | 0,8 | 44.47983 | 6.88950 | 10.150 | 329 | 82 | -126 D |
| 2012 | 7 | 7  | 3  | 27 | 52.180 | 2,2 | 44.00017 | 7.45617 | 7.860  | 38  | 22 | -87 D  |
| 2012 | 7 | 7  | 5  | 17 | 6.770  | 0,8 | 44.62733 | 6.69883 | 8.970  | 212 | 85 | -114 D |
| 2012 | 7 | 7  | 6  | 41 | 27.310 | 1,9 | 44.12850 | 6.94933 | 8.050  | 40  | 49 | 127 D  |
| 2012 | 7 | 7  | 17 | 8  | 29.750 | 1,7 | 44.54767 | 7.25533 | 15.820 | 355 | 63 | -125 D |
| 2012 | 7 | 13 | 6  | 9  | 49.940 | 2,3 | 44.49700 | 6.73833 | 9.350  | 4   | 87 | 172 D  |
| 2012 | 7 | 13 | 6  | 20 | 52.620 | 1   | 44.50633 | 6.68200 | 10.930 | 38  | 46 | -130 D |
| 2012 | 7 | 14 | 6  | 47 | 46.640 | 1,9 | 44.48033 | 7.25750 | 14.870 | 360 | 57 | -105 D |
| 2012 | 7 | 15 | 21 | 22 | 50.950 | 1,1 | 44.49217 | 6.70133 | 9.450  | 29  | 46 | -90 D  |
| 2012 | 7 | 17 | 10 | 24 | 16.740 | 1,6 | 44.79683 | 6.75350 | 9.740  | 281 | 30 | 173 A  |
| 2012 | 7 | 19 | 0  | 20 | 12.370 | 1   | 44.51967 | 6.70000 | 9.890  | 41  | 34 | -87 D  |
| 2012 | 7 | 19 | 2  | 20 | 37.640 | 1,4 | 44.51967 | 6.70000 | 10.130 | 8   | 44 | -111 C |
| 2012 | 7 | 21 | 13 | 44 | 52.740 | 1,4 | 44.48000 | 6.70017 | 10.830 | 10  | 82 | -167 D |
| 2012 | 7 | 24 | 13 | 10 | 3.940  | 2,8 | 44.46000 | 6.97567 | 8.770  | 143 | 87 | -159 D |
| 2012 | 7 | 25 | 16 | 4  | 26.350 | 1,2 | 44.50583 | 6.67350 | 6.470  | 217 | 42 | -94 D  |
| 2012 | 7 | 26 | 17 | 5  | 11.370 | 1,5 | 44.46150 | 6.97300 | 10.270 | 153 | 73 | -170 D |
| 2012 | 7 | 27 | 8  | 59 | 41.090 | 2   | 44.77000 | 7.22900 | 13.700 | 118 | 39 | -141 D |
| 2012 | 7 | 28 | 1  | 30 | 56.950 | 1,3 | 44.74417 | 7.22967 | 14.360 | 150 | 33 | -101 D |
| 2012 | 7 | 29 | 16 | 25 | 25.120 | 1,7 | 44.48550 | 6.70083 | 10.130 | 180 | 74 | -156 D |
| 2012 | 7 | 29 | 19 | 44 | 11.460 | 1,5 | 44.47917 | 6.70050 | 10.710 | 179 | 72 | -151 D |
| 2012 | 8 | 1  | 2  | 55 | 0.450  | 1,6 | 44.71650 | 6.65250 | 7.300  | 146 | 68 | 177 D  |
| 2012 | 8 | 1  | 8  | 53 | 17.860 | 1,1 | 44.47983 | 6.70850 | 10.700 | 195 | 77 | -178 D |
| 2012 | 8 | 1  | 19 | 28 | 7.840  | 1,1 | 44.50583 | 6.69133 | 10.160 | 176 | 80 | -170 D |
| 2012 | 8 | 3  | 21 | 8  | 2.350  | 2,2 | 44.04133 | 7.67067 | 8.290  | 186 | 80 | -137 D |
| 2012 | 8 | 4  | 11 | 50 | 15.000 | 1,8 | 44.48567 | 6.70900 | 10.180 | 187 | 75 | -162 D |
| 2012 | 8 | 4  | 22 | 57 | 44.210 | 1,4 | 44.49983 | 6.69400 | 10.230 | 209 | 55 | -103 B |
| 2012 | 8 | 5  | 17 | 58 | 14.750 | 1,3 | 44.48583 | 6.69967 | 10.310 | 185 | 62 | -132 D |
| 2012 | 8 | 8  | 13 | 3  | 37.440 | 1,3 | 44.62833 | 6.78300 | 9.480  | 52  | 81 | 127 C  |
| 2012 | 8 | 11 | 17 | 15 | 10.730 | 2,4 | 44.49200 | 6.70867 | 9.920  | 152 | 76 | -140 C |
| 2012 | 8 | 11 | 22 | 23 | 25.020 | 0,9 | 44.49267 | 6.70050 | 9.370  | 334 | 75 | -137 D |
| 2012 | 8 | 12 | 0  | 30 | 47.460 | 0,9 | 44.48500 | 6.70900 | 10.240 | 180 | 76 | -145 D |
| 2012 | 8 | 15 | 11 | 44 | 47.140 | 1,2 | 44.42583 | 6.87017 | 10.800 | 179 | 85 | 129 D  |

|      |    |    |    |           |              |         |        |     |    |        |
|------|----|----|----|-----------|--------------|---------|--------|-----|----|--------|
| 2012 | 8  | 16 | 15 | 3 46.360  | 1,4 46.33067 | 7.50617 | 7.340  | 38  | 84 | 131 D  |
| 2012 | 8  | 18 | 23 | 39 2.300  | 1,3 44.49267 | 6.70933 | 9.950  | 170 | 82 | 178 D  |
| 2012 | 8  | 19 | 21 | 11 19.650 | 0,9 44.57150 | 6.66333 | 9.200  | 188 | 34 | -133 D |
| 2012 | 8  | 21 | 1  | 34 25.050 | 1,1 44.48550 | 6.70283 | 11.070 | 190 | 72 | -128 D |
| 2012 | 8  | 22 | 20 | 9 11.680  | 1,5 44.55550 | 7.25733 | 14.850 | 155 | 54 | -155 D |
| 2012 | 8  | 23 | 12 | 29 2.790  | 1,3 44.48133 | 6.70750 | 10.650 | 18  | 77 | 136 D  |
| 2012 | 8  | 24 | 0  | 37 54.090 | 1,5 44.48650 | 6.72100 | 10.650 | 349 | 75 | 152 D  |
| 2012 | 8  | 24 | 23 | 29 41.160 | 1,3 44.55583 | 7.25000 | 14.900 | 352 | 86 | -156 D |
| 2012 | 8  | 25 | 11 | 18 33.640 | 1,9 45.69183 | 6.17383 | 11.290 | 301 | 19 | -8 D   |
| 2012 | 8  | 25 | 12 | 53 25.290 | 1,3 44.49166 | 6.70983 | 9.540  | 186 | 88 | -144 D |
| 2012 | 8  | 27 | 16 | 28 37.400 | 1,8 44.56767 | 6.82450 | 9.430  | 336 | 50 | -150 D |
| 2012 | 9  | 2  | 5  | 45 8.500  | 1,2 44.49950 | 6.69083 | 10.890 | 228 | 44 | -96 D  |
| 2012 | 9  | 2  | 20 | 4 13.180  | 1,8 44.38567 | 7.31400 | 15.680 | 139 | 63 | 107 D  |
| 2012 | 9  | 4  | 1  | 6 14.500  | 1,9 46.92333 | 8.48433 | 10.790 | 78  | 88 | -168 D |
| 2012 | 9  | 4  | 5  | 13 24.400 | 2,6 46.92117 | 8.48417 | 10.280 | 271 | 72 | -178 D |
| 2012 | 9  | 4  | 20 | 47 7.610  | 1,3 44.54967 | 7.25500 | 16.330 | 180 | 44 | -113 D |
| 2012 | 9  | 4  | 21 | 32 32.150 | 1 44.37217   | 7.30683 | 16.090 | 161 | 81 | -155 D |
| 2012 | 9  | 5  | 2  | 47 42.380 | 0,8 44.50000 | 6.69100 | 10.310 | 221 | 56 | -100 D |
| 2012 | 9  | 9  | 16 | 41 50.950 | 1,4 44.79767 | 6.76367 | 10.170 | 244 | 83 | -101 D |
| 2012 | 9  | 10 | 1  | 56 4.790  | 1,5 44.50566 | 6.69133 | 10.350 | 1   | 52 | -126 D |
| 2012 | 9  | 13 | 8  | 25 14.140 | 1,5 44.47867 | 6.71917 | 10.850 | 197 | 45 | -136 D |
| 2012 | 9  | 14 | 23 | 32 50.140 | 1,5 44.43317 | 7.26733 | 14.820 | 248 | 37 | -87 D  |
| 2012 | 9  | 18 | 15 | 59 43.650 | 1 44.46117   | 7.20983 | 16.750 | 111 | 76 | -139 D |
| 2012 | 9  | 19 | 15 | 46 16.540 | 1,4 45.03817 | 6.52983 | 10.890 | 114 | 33 | -171 D |
| 2012 | 9  | 19 | 20 | 3 33.940  | 1,2 44.48367 | 6.71967 | 9.270  | 224 | 36 | 152 D  |
| 2012 | 9  | 20 | 20 | 6 35.640  | 0,9 44.48150 | 6.71650 | 9.330  | 205 | 55 | 151 D  |
| 2012 | 9  | 20 | 23 | 7 43.170  | 1,3 44.46600 | 6.96567 | 10.130 | 325 | 57 | -140 D |
| 2012 | 9  | 21 | 5  | 20 30.980 | 1,8 44.45867 | 6.98400 | 9.380  | 327 | 81 | 179 D  |
| 2012 | 9  | 24 | 7  | 1 42.110  | 2,4 44.44667 | 7.27683 | 13.020 | 232 | 59 | -89 D  |
| 2012 | 9  | 25 | 0  | 22 26.750 | 0,8 46.19717 | 6.94467 | 9.430  | 89  | 73 | -107 D |
| 2012 | 9  | 26 | 22 | 55 58.670 | 0,4 44.50500 | 6.68217 | 8.410  | 159 | 61 | 171 D  |
| 2012 | 9  | 29 | 21 | 6 31.540  | 1,9 44.69567 | 6.75467 | 9.490  | 314 | 39 | -146 A |
| 2012 | 10 | 2  | 9  | 46 30.790 | 1,1 44.49300 | 6.69100 | 11.390 | 199 | 40 | -120 D |
| 2012 | 10 | 3  | 9  | 20 43.550 | 4,1 44.57450 | 7.22083 | 10.370 | 132 | 39 | -62 B  |
| 2012 | 10 | 4  | 3  | 33 40.280 | 1,1 44.62283 | 7.23633 | 15.760 | 359 | 73 | -148 D |
| 2012 | 10 | 4  | 6  | 39 11.010 | 1,4 44.62133 | 7.23900 | 14.920 | 195 | 25 | -144 D |
| 2012 | 10 | 4  | 6  | 40 53.970 | 1,8 44.62800 | 7.24733 | 13.380 | 75  | 72 | -86 D  |
| 2012 | 10 | 4  | 6  | 44 45.650 | 1,6 44.62150 | 7.23667 | 15.970 | 35  | 74 | -102 D |
| 2012 | 10 | 4  | 6  | 45 8.240  | 1,6 44.62267 | 7.21867 | 13.680 | 204 | 29 | -96 D  |
| 2012 | 10 | 4  | 6  | 45 43.840 | 1,3 44.62333 | 7.23617 | 15.920 | 183 | 23 | -164 D |
| 2012 | 10 | 4  | 7  | 39 4.450  | 1,4 44.62200 | 7.21983 | 14.220 | 42  | 68 | -97 D  |
| 2012 | 10 | 4  | 12 | 39 24.740 | 1,8 44.58100 | 7.21967 | 11.060 | 109 | 76 | 109 D  |
| 2012 | 10 | 4  | 14 | 49 36.910 | 1 44.62200   | 7.22983 | 15.530 | 355 | 87 | -165 D |
| 2012 | 10 | 4  | 17 | 27 47.660 | 2,3 44.61717 | 7.22750 | 13.430 | 52  | 39 | -83 D  |
| 2012 | 10 | 4  | 17 | 27 47.660 | 2,3 44.61717 | 7.22750 | 13.430 | 130 | 55 | -98 D  |
| 2012 | 10 | 4  | 23 | 17 8.960  | 1,1 44.62300 | 7.23617 | 15.940 | 33  | 58 | -91 D  |
| 2012 | 10 | 5  | 5  | 52 35.400 | 1,1 44.62967 | 7.22833 | 14.080 | 212 | 21 | -84 D  |
| 2012 | 10 | 5  | 11 | 31 1.230  | 1,2 44.62933 | 7.22817 | 14.370 | 8   | 80 | -117 D |
| 2012 | 10 | 5  | 11 | 51 7.790  | 1,5 44.62233 | 7.22983 | 15.050 | 162 | 90 | 107 D  |
| 2012 | 10 | 5  | 14 | 46 5.370  | 2 44.62300   | 7.24500 | 16.300 | 355 | 53 | -126 D |
| 2012 | 10 | 5  | 14 | 53 19.070 | 1,8 44.62183 | 7.23967 | 16.340 | 342 | 87 | -108 D |
| 2012 | 10 | 5  | 15 | 9 1.520   | 2,6 44.62033 | 7.24600 | 15.190 | 355 | 64 | -120 D |
| 2012 | 10 | 5  | 15 | 34 0.970  | 1,8 44.62167 | 7.23733 | 15.780 | 22  | 49 | -95 D  |

\*

\*

|      |    |    |    |    |        |     |          |         |        |     |    |        |
|------|----|----|----|----|--------|-----|----------|---------|--------|-----|----|--------|
| 2012 | 10 | 5  | 17 | 40 | 53.880 | 0,9 | 44.62267 | 7.21917 | 14.200 | 231 | 24 | -81 D  |
| 2012 | 10 | 5  | 17 | 41 | 21.320 | 1,4 | 44.62283 | 7.21100 | 12.600 | 5   | 63 | -105 D |
| 2012 | 10 | 5  | 19 | 10 | 41.470 | 3,4 | 44.61633 | 7.23967 | 13.550 | 341 | 80 | -139 C |
| 2012 | 10 | 5  | 19 | 20 | 58.710 | 1,3 | 44.62783 | 7.22883 | 11.990 | 159 | 84 | -154 D |
| 2012 | 10 | 5  | 19 | 23 | 11.330 | 1,7 | 44.62333 | 7.23817 | 15.640 | 189 | 88 | 122 D  |
| 2012 | 10 | 5  | 19 | 24 | 4.820  | 1   | 44.64333 | 7.20700 | 9.200  | 171 | 84 | -129 D |
| 2012 | 10 | 5  | 19 | 33 | 7.690  | 1,1 | 44.62250 | 7.22933 | 14.380 | 158 | 76 | -141 D |
| 2012 | 10 | 5  | 19 | 41 | 5.420  | 1   | 44.62300 | 7.21900 | 14.270 | 13  | 71 | -101 D |
| 2012 | 10 | 5  | 19 | 41 | 45.650 | 0,7 | 44.62267 | 7.21000 | 12.680 | 357 | 78 | -117 D |
| 2012 | 10 | 5  | 19 | 45 | 11.740 | 1,1 | 44.62900 | 7.22150 | 14.000 | 14  | 77 | -106 D |
| 2012 | 10 | 5  | 19 | 48 | 20.820 | 1,7 | 44.62317 | 7.23767 | 15.980 | 355 | 79 | -159 D |
| 2012 | 10 | 5  | 20 | 3  | 29.230 | 2,1 | 44.62283 | 7.23733 | 15.090 | 357 | 63 | -118 D |
| 2012 | 10 | 5  | 20 | 4  | 52.420 | 1,6 | 44.62267 | 7.23917 | 16.690 | 333 | 83 | -170 D |
| 2012 | 10 | 5  | 20 | 49 | 25.530 | 0,9 | 44.62317 | 7.21967 | 14.180 | 40  | 57 | -93 D  |
| 2012 | 10 | 5  | 20 | 57 | 11.760 | 1,2 | 44.62200 | 7.21867 | 13.510 | 36  | 43 | -103 D |
| 2012 | 10 | 5  | 20 | 58 | 41.640 | 1,9 | 44.62167 | 7.24083 | 16.320 | 25  | 54 | -97 D  |
| 2012 | 10 | 5  | 21 | 33 | 11.300 | 1,2 | 44.62333 | 7.22983 | 13.330 | 7   | 72 | -102 D |
| 2012 | 10 | 5  | 21 | 35 | 44.560 | 1,8 | 44.61600 | 7.23917 | 15.800 | 165 | 84 | 179 D  |
| 2012 | 10 | 5  | 22 | 17 | 48.190 | 1,2 | 44.62300 | 7.23733 | 16.250 | 344 | 90 | -175 D |
| 2012 | 10 | 5  | 22 | 53 | 46.630 | 1   | 44.62883 | 7.22017 | 13.450 | 179 | 39 | -123 D |
| 2012 | 10 | 6  | 0  | 5  | 0.730  | 1,4 | 44.62317 | 7.22867 | 15.110 | 171 | 86 | 127 D  |
| 2012 | 10 | 6  | 0  | 14 | 8.660  | 1,2 | 44.62283 | 7.22850 | 15.070 | 182 | 37 | -123 D |
| 2012 | 10 | 6  | 1  | 22 | 27.000 | 1,1 | 44.62150 | 7.22917 | 14.990 | 65  | 70 | -91 D  |
| 2012 | 10 | 6  | 1  | 56 | 3.180  | 1,2 | 44.62200 | 7.24083 | 15.600 | 183 | 84 | 173 D  |
| 2012 | 10 | 6  | 2  | 10 | 30.200 | 1,1 | 44.62933 | 7.21933 | 12.910 | 211 | 30 | -103 D |
| 2012 | 10 | 6  | 2  | 14 | 52.790 | 1,5 | 45.30100 | 5.87583 | 10.830 | 249 | 83 | -138 D |
| 2012 | 10 | 6  | 2  | 36 | 32.970 | 1,7 | 44.62333 | 7.24650 | 15.850 | 216 | 41 | -70 D  |
| 2012 | 10 | 6  | 2  | 46 | 1.820  | 1   | 44.62300 | 7.22050 | 14.870 | 359 | 69 | -108 D |
| 2012 | 10 | 6  | 2  | 54 | 11.920 | 1,2 | 44.62467 | 7.22983 | 15.110 | 178 | 31 | -117 D |
| 2012 | 10 | 6  | 3  | 7  | 20.710 | 0,8 | 44.62283 | 7.22733 | 15.890 | 258 | 25 | -68 D  |
| 2012 | 10 | 6  | 4  | 49 | 29.160 | 1,7 | 44.62267 | 7.24667 | 16.410 | 355 | 89 | -123 D |
| 2012 | 10 | 6  | 5  | 6  | 32.820 | 0,9 | 44.62967 | 7.23017 | 14.920 | 58  | 39 | -87 D  |
| 2012 | 10 | 6  | 5  | 30 | 7.480  | 2,1 | 44.62317 | 7.23900 | 15.580 | 154 | 53 | -154 D |
| 2012 | 10 | 6  | 7  | 3  | 20.840 | 1,7 | 44.62250 | 7.23767 | 16.630 | 167 | 35 | -139 D |
| 2012 | 10 | 6  | 7  | 23 | 30.470 | 1,4 | 44.62083 | 7.23933 | 16.620 | 173 | 21 | -127 D |
| 2012 | 10 | 6  | 8  | 22 | 26.640 | 1,1 | 44.62083 | 7.22083 | 14.000 | 49  | 47 | -138 D |
| 2012 | 10 | 6  | 9  | 8  | 11.100 | 1,5 | 44.62933 | 7.22017 | 13.490 | 37  | 78 | -125 D |
| 2012 | 10 | 6  | 10 | 47 | 24.410 | 1,4 | 44.62233 | 7.24717 | 15.170 | 14  | 84 | -133 D |
| 2012 | 10 | 6  | 20 | 4  | 53.680 | 1   | 44.62283 | 7.22917 | 14.920 | 247 | 51 | -76 D  |
| 2012 | 10 | 6  | 22 | 1  | 36.640 | 1   | 44.62183 | 7.22867 | 15.690 | 187 | 26 | -124 D |
| 2012 | 10 | 6  | 23 | 37 | 57.920 | 0,9 | 44.62733 | 7.23783 | 16.660 | 217 | 21 | -94 D  |
| 2012 | 10 | 7  | 0  | 49 | 59.530 | 1,2 | 44.62150 | 7.24583 | 16.450 | 347 | 83 | -161 D |
| 2012 | 10 | 7  | 6  | 40 | 10.530 | 2,4 | 44.97133 | 8.25833 | 29.170 | 152 | 86 | 174 D  |
| 2012 | 10 | 8  | 0  | 27 | 21.240 | 1,3 | 44.62250 | 7.21917 | 13.430 | 12  | 77 | -105 D |
| 2012 | 10 | 8  | 12 | 48 | 31.700 | 1,2 | 44.52133 | 7.21683 | 14.690 | 285 | 35 | -140 D |
| 2012 | 10 | 10 | 0  | 35 | 36.440 | 1,8 | 44.98033 | 8.25917 | 31.110 | 353 | 67 | -137 D |
| 2012 | 10 | 11 | 14 | 18 | 40.870 | 2,3 | 45.03350 | 6.61983 | 10.560 | 307 | 76 | -142 D |
| 2012 | 10 | 12 | 4  | 51 | 41.970 | 2,4 | 44.97150 | 8.22067 | 26.080 | 155 | 83 | 179 D  |
| 2012 | 10 | 12 | 6  | 44 | 25.550 | 1,4 | 44.62183 | 7.21850 | 14.330 | 162 | 86 | 177 D  |
| 2012 | 10 | 13 | 0  | 25 | 5.290  | 1   | 44.62833 | 7.22867 | 14.860 | 218 | 36 | -99 D  |
| 2012 | 10 | 13 | 9  | 57 | 20.620 | 1,3 | 44.63567 | 7.21833 | 12.750 | 236 | 20 | -57 D  |
| 2012 | 10 | 14 | 15 | 52 | 27.920 | 1,6 | 44.72933 | 6.66883 | 7.990  | 186 | 69 | -118 D |
| 2012 | 10 | 14 | 20 | 49 | 39.470 | 2,2 | 44.98367 | 8.26750 | 31.630 | 126 | 67 | 170 D  |

|      |    |    |    |    |        |     |          |         |        |     |    |        |
|------|----|----|----|----|--------|-----|----------|---------|--------|-----|----|--------|
| 2012 | 10 | 14 | 21 | 56 | 4.180  | 1,8 | 46.08950 | 6.89433 | 9.120  | 246 | 73 | 174 D  |
| 2012 | 10 | 15 | 13 | 12 | 6.840  | 1,2 | 44.50566 | 6.68917 | 10.270 | 158 | 88 | -173 D |
| 2012 | 10 | 17 | 12 | 17 | 13.070 | 2   | 44.49967 | 6.69900 | 10.010 | 175 | 63 | -144 C |
| 2012 | 10 | 20 | 7  | 37 | 46.500 | 1,3 | 44.62333 | 7.20017 | 11.330 | 206 | 40 | -143 D |
| 2012 | 10 | 20 | 22 | 45 | 21.140 | 2,2 | 46.99883 | 7.22200 | 9.400  | 86  | 88 | -158 D |
| 2012 | 10 | 23 | 14 | 12 | 23.760 | 1,7 | 44.49933 | 7.25783 | 15.580 | 136 | 33 | -95 D  |
| 2012 | 10 | 25 | 1  | 10 | 56.830 | 3,3 | 46.04683 | 6.92183 | 8.960  | 233 | 84 | 152 D  |
| 2012 | 10 | 29 | 2  | 32 | 35.830 | 2,1 | 44.97033 | 8.23050 | 27.560 | 145 | 86 | 164 D  |
| 2012 | 10 | 29 | 14 | 16 | 23.220 | 2,3 | 46.89017 | 8.27567 | 6.810  | 53  | 82 | -170 D |
| 2012 | 10 | 31 | 6  | 43 | 48.410 | 1,1 | 44.50683 | 6.69117 | 10.330 | 235 | 49 | -83 D  |
| 2012 | 11 | 1  | 5  | 25 | 40.720 | 1,8 | 45.65450 | 5.99033 | 9.320  | 250 | 33 | -132 D |
| 2012 | 11 | 2  | 18 | 22 | 39.150 | 2,6 | 44.48633 | 6.72933 | 9.140  | 6   | 46 | -103 C |
| 2012 | 11 | 5  | 4  | 3  | 15.600 | 2,2 | 44.49500 | 7.25867 | 8.990  | 228 | 33 | 154 D  |
| 2012 | 11 | 6  | 20 | 45 | 6.040  | 1,5 | 44.63017 | 7.22767 | 14.420 | 3   | 86 | -121 D |
| 2012 | 11 | 9  | 0  | 50 | 26.840 | 1   | 44.48583 | 6.70900 | 10.790 | 220 | 78 | -120 D |
| 2012 | 11 | 11 | 20 | 13 | 43.110 | 2,1 | 44.79817 | 6.76317 | 9.750  | 342 | 62 | -155 D |
| 2012 | 11 | 13 | 9  | 3  | 28.320 | 1,4 | 44.62867 | 7.21867 | 13.640 | 267 | 34 | -71 D  |
| 2012 | 11 | 15 | 14 | 55 | 48.480 | 1,3 | 44.62867 | 7.21833 | 12.970 | 177 | 38 | -159 D |
| 2012 | 11 | 16 | 23 | 59 | 37.240 | 1,6 | 44.49317 | 6.70000 | 9.460  | 160 | 80 | -166 D |
| 2012 | 11 | 17 | 2  | 25 | 43.930 | 1,4 | 44.48067 | 6.72717 | 8.740  | 194 | 50 | -102 D |
| 2012 | 11 | 17 | 5  | 41 | 10.120 | 1,6 | 44.48650 | 6.70017 | 10.620 | 167 | 78 | -163 C |
| 2012 | 11 | 20 | 1  | 33 | 56.060 | 1,8 | 44.97933 | 8.32783 | 37.910 | 146 | 80 | -153 D |
| 2012 | 11 | 20 | 16 | 17 | 22.790 | 2,3 | 44.99783 | 8.28950 | 35.140 | 319 | 61 | -134 D |
| 2012 | 11 | 21 | 1  | 56 | 54.060 | 1,9 | 44.62783 | 6.70833 | 8.980  | 266 | 33 | -135 C |
| 2012 | 11 | 21 | 3  | 35 | 29.400 | 1,1 | 44.47967 | 6.72100 | 9.320  | 175 | 68 | -143 D |
| 2012 | 11 | 21 | 7  | 9  | 3.110  | 0,9 | 44.78867 | 6.75150 | 10.260 | 208 | 80 | -81 C  |
| 2012 | 11 | 22 | 10 | 27 | 9.020  | 2   | 44.98500 | 8.24850 | 33.500 | 216 | 50 | -94 D  |
| 2012 | 11 | 22 | 11 | 8  | 4.470  | 2,1 | 44.48617 | 6.70033 | 10.780 | 177 | 61 | -141 C |
| 2012 | 11 | 22 | 14 | 57 | 48.670 | 1   | 44.49117 | 6.69767 | 10.710 | 161 | 82 | -171 D |
| 2012 | 11 | 25 | 14 | 56 | 45.650 | 2   | 44.49233 | 6.70033 | 10.090 | 2   | 52 | -132 B |
| 2012 | 12 | 1  | 13 | 22 | 6.890  | 1,7 | 45.16367 | 7.65017 | 29.740 | 17  | 57 | 159 D  |
| 2012 | 12 | 5  | 21 | 34 | 9.040  | 1,6 | 45.14000 | 6.52067 | 9.690  | 199 | 87 | -163 D |
| 2012 | 12 | 8  | 14 | 8  | 22.010 | 1,4 | 44.70284 | 6.80167 | 10.940 | 131 | 52 | -100 D |
| 2012 | 12 | 8  | 14 | 8  | 22.010 | 1,4 | 44.70284 | 6.80167 | 10.940 | 178 | 45 | -110 D |
| 2012 | 12 | 10 | 23 | 1  | 41.240 | 2,1 | 44.37333 | 7.25633 | 15.160 | 61  | 90 | 176 D  |
| 2012 | 12 | 12 | 7  | 55 | 46.530 | 2,6 | 45.25183 | 5.96483 | 9.730  | 209 | 82 | 157 D  |
| 2012 | 12 | 15 | 22 | 0  | 25.050 | 2   | 44.48067 | 7.27267 | 18.000 | 9   | 51 | -90 D  |
| 2012 | 12 | 18 | 0  | 8  | 52.040 | 1,6 | 44.28600 | 6.23233 | 7.930  | 134 | 85 | 105 D  |
| 2012 | 12 | 20 | 17 | 40 | 15.750 | 0,9 | 44.51367 | 6.68333 | 9.520  | 138 | 66 | 146 D  |
| 2012 | 12 | 23 | 19 | 49 | 32.900 | 1,1 | 46.23333 | 7.13667 | 7.240  | 265 | 83 | 123 D  |
| 2012 | 12 | 24 | 14 | 29 | 51.780 | 2,4 | 44.29100 | 7.47417 | 11.580 | 106 | 61 | -81 D  |
| 2012 | 12 | 24 | 17 | 37 | 49.100 | 1,6 | 44.47917 | 6.71917 | 9.350  | 187 | 55 | -112 D |
| 2012 | 12 | 24 | 17 | 54 | 26.260 | 1,4 | 44.68333 | 7.32133 | 18.940 | 190 | 28 | -118 D |
| 2012 | 12 | 25 | 14 | 31 | 32.710 | 2,1 | 44.48617 | 6.70050 | 10.770 | 172 | 73 | -160 D |
| 2012 | 12 | 29 | 1  | 39 | 7.730  | 1   | 44.62217 | 7.23767 | 16.410 | 58  | 52 | -97 D  |
| 2012 | 12 | 30 | 9  | 53 | 3.530  | 1,6 | 44.84583 | 7.20717 | 12.150 | 190 | 43 | -116 D |
| 2012 | 12 | 30 | 21 | 25 | 33.730 | 1,3 | 44.46150 | 7.25767 | 14.590 | 332 | 88 | -112 D |
| 2012 | 12 | 31 | 0  | 59 | 1.760  | 2   | 45.12533 | 6.48300 | 8.200  | 93  | 58 | -93 D  |
| 2012 | 12 | 31 | 12 | 48 | 6.390  | 2,6 | 44.50267 | 7.27650 | 16.570 | 347 | 41 | -112 C |
| 2013 | 1  | 2  | 23 | 56 | 15.620 | 2,9 | 44.71733 | 6.66000 | 5.150  | 195 | 74 | -147 D |
| 2013 | 1  | 5  | 7  | 46 | 50.400 | 2,4 | 46.21050 | 7.68033 | 11.650 | 325 | 41 | -84 B  |
| 2013 | 1  | 7  | 4  | 20 | 23.260 | 3,7 | 44.76283 | 6.63967 | 8.120  | 208 | 56 | -122 B |
| 2013 | 1  | 7  | 5  | 15 | 8.680  | 1,1 | 44.76333 | 6.62950 | 8.700  | 222 | 41 | -95 D  |

\*

\*

|      |   |    |    |    |        |     |          |         |        |     |    |        |
|------|---|----|----|----|--------|-----|----------|---------|--------|-----|----|--------|
| 2013 | 1 | 7  | 9  | 10 | 11.300 | 2,1 | 44.76250 | 6.63233 | 8.200  | 61  | 35 | -94 D  |
| 2013 | 1 | 9  | 21 | 59 | 28.670 | 1   | 44.56783 | 6.87783 | 9.550  | 82  | 34 | 73 D   |
| 2013 | 1 | 12 | 22 | 24 | 11.350 | 2,4 | 46.39783 | 6.49083 | 10.290 | 61  | 80 | -126 D |
| 2013 | 1 | 12 | 22 | 38 | 47.380 | 2,1 | 46.40333 | 6.49033 | 11.210 | 239 | 85 | -171 D |
| 2013 | 1 | 13 | 8  | 47 | 33.680 | 1,5 | 44.73300 | 6.62133 | 8.230  | 148 | 71 | 151 D  |
| 2013 | 1 | 13 | 8  | 48 | 45.520 | 1,6 | 44.72883 | 6.63200 | 8.230  | 162 | 79 | 152 D  |
| 2013 | 1 | 15 | 14 | 18 | 45.410 | 1,3 | 44.63450 | 6.90750 | 10.280 | 191 | 87 | -168 D |
| 2013 | 1 | 15 | 14 | 20 | 58.710 | 2   | 44.63500 | 6.90700 | 10.300 | 233 | 45 | -86 D  |
| 2013 | 1 | 16 | 0  | 14 | 34.870 | 1,7 | 46.21150 | 7.67317 | 9.400  | 285 | 40 | -109 D |
| 2013 | 1 | 23 | 15 | 33 | 4.010  | 2   | 44.41950 | 7.25650 | 16.010 | 161 | 87 | 166 D  |
| 2013 | 1 | 26 | 8  | 34 | 10.480 | 1,6 | 44.09300 | 6.68683 | 8.430  | 33  | 43 | 180 D  |
| 2013 | 1 | 29 | 19 | 13 | 43.060 | 1,3 | 44.47850 | 6.69950 | 11.640 | 322 | 8  | -70 D  |
| 2013 | 1 | 31 | 23 | 39 | 22.920 | 1,5 | 44.77067 | 7.21900 | 15.700 | 343 | 77 | 173 D  |
| 2013 | 2 | 2  | 6  | 16 | 58.040 | 2,4 | 45.93950 | 7.74800 | 8.650  | 50  | 84 | -167 D |
| 2013 | 2 | 6  | 16 | 23 | 18.280 | 2,1 | 44.41267 | 6.94800 | 9.550  | 321 | 77 | 178 D  |
| 2013 | 2 | 6  | 16 | 25 | 59.840 | 1,7 | 44.41217 | 6.94567 | 10.040 | 321 | 84 | 161 D  |
| 2013 | 2 | 8  | 1  | 15 | 1.490  | 2,2 | 44.53533 | 7.20100 | 10.420 | 297 | 82 | -125 D |
| 2013 | 2 | 10 | 23 | 14 | 19.230 | 2,2 | 44.51850 | 6.69300 | 10.910 | 190 | 68 | -116 A |
| 2013 | 2 | 11 | 14 | 7  | 53.900 | 1,6 | 44.50633 | 6.69733 | 11.570 | 65  | 34 | -67 D  |
| 2013 | 2 | 12 | 0  | 1  | 47.400 | 1,2 | 44.51100 | 6.69933 | 10.900 | 334 | 87 | 156 D  |
| 2013 | 2 | 16 | 2  | 56 | 33.180 | 1,4 | 44.50100 | 6.69000 | 11.810 | 146 | 88 | -139 D |
| 2013 | 2 | 20 | 0  | 24 | 52.900 | 1   | 44.43367 | 6.76967 | 7.930  | 334 | 86 | -171 D |
| 2013 | 2 | 21 | 20 | 55 | 2.970  | 2   | 44.74400 | 7.18033 | 12.000 | 8   | 37 | -89 D  |
| 2013 | 2 | 25 | 1  | 1  | 42.640 | 3,5 | 45.29933 | 7.41917 | 0.060  | 30  | 71 | -131 D |
| 2013 | 2 | 26 | 11 | 57 | 19.250 | 2,4 | 46.39650 | 8.55050 | 12.390 | 252 | 71 | -165 C |
| 2013 | 3 | 11 | 7  | 55 | 14.100 | 1,9 | 44.48900 | 7.08717 | 10.310 | 246 | 51 | 110 D  |
| 2013 | 3 | 12 | 22 | 8  | 2.760  | 1,2 | 44.48417 | 6.71217 | 10.620 | 3   | 84 | -168 D |
| 2013 | 3 | 17 | 11 | 16 | 28.840 | 1,9 | 44.51917 | 6.68217 | 11.010 | 56  | 36 | -68 D  |
| 2013 | 3 | 20 | 22 | 32 | 5.780  | 1,4 | 44.98083 | 7.05850 | 13.040 | 353 | 79 | 123 D  |
| 2013 | 3 | 24 | 3  | 8  | 37.560 | 1,4 | 44.57367 | 6.76567 | 8.800  | 335 | 43 | -97 D  |
| 2013 | 3 | 27 | 1  | 31 | 19.890 | 0,8 | 44.51867 | 6.70017 | 10.110 | 203 | 65 | -106 D |
| 2013 | 3 | 28 | 12 | 35 | 20.550 | 1,1 | 44.40933 | 6.49350 | 10.580 | 330 | 84 | 158 D  |
| 2013 | 3 | 29 | 8  | 32 | 59.970 | 1,4 | 46.35567 | 7.43833 | 11.370 | 149 | 50 | -78 D  |
| 2013 | 3 | 29 | 13 | 50 | 34.390 | 1,7 | 46.36133 | 7.43900 | 12.200 | 305 | 63 | -138 D |
| 2013 | 3 | 29 | 20 | 19 | 52.320 | 1   | 46.19700 | 6.94400 | 9.640  | 220 | 86 | 146 D  |
| 2013 | 3 | 30 | 20 | 43 | 20.330 | 2,7 | 44.64983 | 7.46217 | 12.600 | 97  | 83 | -178 D |
| 2013 | 4 | 1  | 21 | 21 | 22.160 | 1,8 | 46.17350 | 7.46767 | 11.420 | 224 | 87 | 159 D  |
| 2013 | 4 | 2  | 8  | 3  | 0.580  | 1,8 | 44.59367 | 7.20250 | 13.700 | 22  | 53 | -91 D  |
| 2013 | 4 | 6  | 20 | 49 | 4.910  | 2,7 | 45.93267 | 6.12900 | 3.230  | 54  | 77 | 150 B  |
| 2013 | 4 | 6  | 23 | 15 | 28.600 | 2,5 | 46.17017 | 7.40867 | 11.200 | 54  | 86 | -172 B |
| 2013 | 4 | 7  | 3  | 13 | 11.900 | 3,5 | 44.25817 | 7.38950 | 13.190 | 277 | 62 | -127 A |
| 2013 | 4 | 7  | 19 | 28 | 22.260 | 2,6 | 45.30583 | 7.47617 | 10.480 | 224 | 78 | -154 C |
| 2013 | 4 | 8  | 4  | 59 | 5.320  | 1,8 | 46.16350 | 7.42667 | 11.250 | 279 | 21 | -58 D  |
| 2013 | 4 | 8  | 7  | 38 | 58.170 | 1,8 | 44.59033 | 7.19967 | 12.620 | 13  | 39 | -103 D |
| 2013 | 4 | 10 | 15 | 13 | 11.040 | 1,2 | 44.54633 | 6.68383 | 9.330  | 67  | 39 | -93 D  |
| 2013 | 4 | 11 | 18 | 17 | 4.530  | 1,4 | 44.45300 | 6.94800 | 11.000 | 279 | 81 | 170 D  |
| 2013 | 4 | 13 | 17 | 30 | 37.870 | 2,2 | 44.78383 | 6.76267 | 10.900 | 208 | 81 | -92 D  |
| 2013 | 4 | 13 | 19 | 15 | 37.650 | 2,1 | 44.76300 | 6.75483 | 10.400 | 341 | 35 | -135 D |
| 2013 | 4 | 14 | 20 | 20 | 43.540 | 2,2 | 44.57500 | 7.21950 | 10.920 | 87  | 42 | -74 D  |
| 2013 | 4 | 15 | 14 | 49 | 11.180 | 1,7 | 44.52200 | 7.27383 | 15.610 | 25  | 21 | -116 D |
| 2013 | 4 | 15 | 15 | 12 | 25.400 | 2   | 46.33967 | 7.37017 | 9.370  | 49  | 89 | 154 D  |
| 2013 | 4 | 15 | 20 | 44 | 19.880 | 1,3 | 46.33983 | 7.36983 | 8.880  | 258 | 76 | -133 D |
| 2013 | 4 | 17 | 4  | 1  | 16.060 | 1   | 44.50800 | 6.69000 | 11.820 | 262 | 46 | -108 D |

|      |   |    |    |    |        |     |          |         |        |     |    |        |
|------|---|----|----|----|--------|-----|----------|---------|--------|-----|----|--------|
| 2013 | 4 | 17 | 7  | 16 | 50.610 | 1,7 | 46.03517 | 6.89483 | 10.470 | 244 | 77 | 170 D  |
| 2013 | 4 | 17 | 13 | 32 | 48.560 | 1,8 | 45.56050 | 6.64633 | 10.320 | 62  | 45 | -87 D  |
| 2013 | 4 | 17 | 13 | 37 | 39.140 | 2   | 44.50733 | 6.69050 | 11.640 | 168 | 76 | -131 C |
| 2013 | 4 | 17 | 22 | 1  | 7.090  | 1,1 | 46.03950 | 6.88333 | 9.110  | 73  | 82 | 143 D  |
| 2013 | 4 | 29 | 12 | 4  | 58.990 | 1,6 | 44.51250 | 6.70000 | 10.900 | 170 | 59 | -105 D |
| 2013 | 5 | 3  | 2  | 2  | 52.470 | 1,9 | 44.64167 | 6.82250 | 10.450 | 268 | 16 | 154 D  |
| 2013 | 5 | 3  | 11 | 24 | 25.170 | 1,4 | 44.61567 | 7.08850 | 12.100 | 130 | 31 | -108 D |
| 2013 | 5 | 3  | 20 | 16 | 27.600 | 1,5 | 44.88300 | 6.66667 | 10.250 | 112 | 55 | 176 D  |
| 2013 | 5 | 5  | 4  | 12 | 23.910 | 1,2 | 44.50017 | 6.67067 | 11.770 | 159 | 59 | -114 D |
| 2013 | 5 | 5  | 5  | 33 | 35.100 | 2,1 | 44.87733 | 6.66683 | 9.770  | 172 | 70 | -155 D |
| 2013 | 5 | 6  | 9  | 47 | 43.090 | 1,8 | 44.88383 | 6.66000 | 10.320 | 309 | 85 | 178 D  |
| 2013 | 5 | 6  | 9  | 52 | 39.900 | 1,7 | 44.87817 | 6.66400 | 9.590  | 132 | 90 | -152 D |
| 2013 | 5 | 6  | 9  | 54 | 55.030 | 2,2 | 44.87817 | 6.66817 | 9.680  | 324 | 83 | 129 D  |
| 2013 | 5 | 22 | 16 | 48 | 13.870 | 1,7 | 44.56833 | 7.20200 | 11.270 | 137 | 40 | -91 D  |
| 2013 | 6 | 1  | 4  | 16 | 19.790 | 2,2 | 44.27950 | 6.26167 | 3.380  | 139 | 63 | 145 D  |
| 2013 | 6 | 1  | 16 | 31 | 56.630 | 3,3 | 44.28250 | 6.26150 | 3.310  | 336 | 83 | 166 D  |
| 2013 | 6 | 1  | 16 | 46 | 56.390 | 2,4 | 44.27950 | 6.25267 | 4.580  | 336 | 86 | 178 D  |
| 2013 | 6 | 1  | 19 | 12 | 31.640 | 2,1 | 44.27333 | 6.26000 | 3.260  | 328 | 72 | -135 D |
| 2013 | 6 | 1  | 22 | 21 | 48.020 | 2,6 | 44.28017 | 6.26300 | 2.530  | 338 | 86 | 166 D  |
| 2013 | 6 | 2  | 10 | 18 | 32.370 | 1,5 | 46.03500 | 6.89567 | 10.600 | 236 | 85 | 180 D  |
| 2013 | 6 | 8  | 19 | 34 | 3.370  | 1,8 | 44.49200 | 6.70850 | 10.860 | 155 | 84 | -143 D |
| 2013 | 6 | 11 | 3  | 29 | 31.190 | 1,6 | 44.84050 | 7.57917 | 28.420 | 314 | 71 | 152 D  |
| 2013 | 6 | 13 | 10 | 20 | 55.690 | 1,1 | 44.48667 | 6.70967 | 11.470 | 161 | 80 | -147 D |
| 2013 | 6 | 15 | 19 | 18 | 14.510 | 2   | 44.49200 | 6.70950 | 10.860 | 327 | 86 | 124 D  |
| 2013 | 6 | 17 | 3  | 32 | 28.620 | 1,6 | 44.55633 | 7.24783 | 15.610 | 326 | 54 | -164 D |
| 2013 | 6 | 25 | 2  | 46 | 1.680  | 1,6 | 45.12283 | 7.11067 | 12.460 | 242 | 41 | -96 D  |
| 2013 | 6 | 25 | 20 | 50 | 31.490 | 1,6 | 46.36083 | 7.41767 | 7.580  | 72  | 19 | 106 D  |
| 2013 | 6 | 28 | 23 | 50 | 40.830 | 1,4 | 45.03933 | 6.58917 | 10.450 | 159 | 52 | -113 D |
| 2013 | 7 | 8  | 3  | 50 | 37.150 | 1,9 | 46.77250 | 8.03750 | 9.590  | 95  | 77 | -143 D |
| 2013 | 7 | 10 | 13 | 17 | 16.300 | 1,9 | 44.36367 | 6.73667 | 10.590 | 324 | 82 | -156 D |
| 2013 | 7 | 17 | 4  | 26 | 16.660 | 1,6 | 46.34600 | 7.42700 | 9.480  | 310 | 48 | -98 D  |
| 2013 | 7 | 18 | 14 | 41 | 3.810  | 1,1 | 44.63600 | 6.79150 | 11.140 | 101 | 87 | 175 D  |
| 2013 | 7 | 19 | 22 | 10 | 46.960 | 1,9 | 44.51417 | 7.23850 | 15.490 | 219 | 49 | -90 D  |
| 2013 | 7 | 23 | 7  | 8  | 50.830 | 1,9 | 45.44717 | 6.65200 | 9.560  | 185 | 85 | -116 D |
| 2013 | 7 | 24 | 19 | 3  | 34.020 | 2,3 | 45.65483 | 6.72483 | 7.960  | 40  | 41 | -125 D |
| 2013 | 7 | 25 | 19 | 51 | 19.980 | 1,1 | 45.04050 | 6.60833 | 11.200 | 331 | 74 | -164 D |
| 2013 | 7 | 27 | 14 | 30 | 35.900 | 1,5 | 46.17700 | 7.80533 | 12.080 | 20  | 64 | -163 D |
| 2013 | 7 | 30 | 1  | 58 | 32.680 | 2,3 | 45.90816 | 6.94217 | 10.680 | 299 | 84 | 164 D  |
| 2013 | 8 | 2  | 2  | 0  | 34.890 | 2   | 44.43267 | 7.00033 | 10.840 | 287 | 72 | -163 D |
| 2013 | 8 | 3  | 9  | 22 | 23.800 | 1,9 | 46.21684 | 7.56300 | 9.070  | 275 | 24 | -78 D  |
| 2013 | 8 | 6  | 15 | 18 | 15.020 | 1,3 | 44.66217 | 6.86783 | 10.340 | 86  | 89 | 123 D  |
| 2013 | 8 | 10 | 11 | 10 | 56.130 | 1   | 45.43884 | 6.05200 | 11.870 | 51  | 83 | 121 D  |
| 2013 | 8 | 14 | 6  | 6  | 51.090 | 1,3 | 45.67500 | 6.83950 | 10.900 | 120 | 35 | -76 D  |
| 2013 | 8 | 14 | 6  | 15 | 35.320 | 1,6 | 45.67633 | 6.84200 | 11.700 | 61  | 89 | 172 D  |
| 2013 | 8 | 23 | 20 | 4  | 28.950 | 2,1 | 44.54150 | 7.56700 | 17.360 | 277 | 71 | -142 D |
| 2013 | 8 | 27 | 1  | 18 | 54.720 | 2,2 | 45.33250 | 5.65317 | 5.480  | 59  | 90 | 167 D  |
| 2013 | 8 | 29 | 20 | 41 | 24.820 | 1,5 | 44.59517 | 7.22150 | 15.450 | 158 | 82 | 171 D  |
| 2013 | 9 | 3  | 2  | 34 | 6.320  | 1,8 | 44.96067 | 6.67717 | 9.760  | 222 | 69 | -94 D  |
| 2013 | 9 | 14 | 12 | 54 | 27.080 | 1,9 | 45.20367 | 5.66633 | 9.990  | 270 | 83 | -177 D |
| 2013 | 9 | 14 | 18 | 8  | 17.740 | 1,2 | 45.23300 | 6.47183 | 7.570  | 46  | 46 | -161 D |
| 2013 | 9 | 14 | 22 | 15 | 47.360 | 1,3 | 45.22983 | 6.46900 | 7.480  | 105 | 53 | 87 D   |
| 2013 | 9 | 16 | 13 | 30 | 15.340 | 2,2 | 44.51900 | 6.68233 | 11.760 | 21  | 34 | -102 D |
| 2013 | 9 | 20 | 23 | 8  | 49.580 | 1,9 | 44.64150 | 6.74700 | 8.060  | 223 | 46 | 143 D  |

|      |    |    |    |    |        |     |          |         |        |     |    |        |
|------|----|----|----|----|--------|-----|----------|---------|--------|-----|----|--------|
| 2013 | 9  | 21 | 23 | 3  | 18.710 | 1,6 | 44.84633 | 6.83917 | 13.550 | 187 | 53 | -124 D |
| 2013 | 9  | 24 | 23 | 29 | 56.320 | 1,2 | 44.81667 | 6.67800 | 10.440 | 186 | 64 | -101 D |
| 2013 | 9  | 25 | 16 | 25 | 47.830 | 1,9 | 44.51983 | 6.68883 | 10.930 | 225 | 60 | -113 D |
| 2013 | 9  | 25 | 16 | 50 | 30.060 | 1,1 | 44.51350 | 6.68250 | 11.530 | 5   | 84 | 140 D  |
| 2013 | 9  | 29 | 4  | 3  | 57.120 | 2,4 | 46.02583 | 6.62117 | 7.370  | 135 | 72 | 179 D  |
| 2013 | 10 | 1  | 6  | 13 | 24.680 | 1,8 | 44.62200 | 6.72700 | 10.050 | 299 | 20 | 148 D  |
| 2013 | 10 | 1  | 8  | 51 | 37.690 | 1,1 | 44.55367 | 6.67800 | 10.920 | 288 | 77 | 73 D   |
| 2013 | 10 | 2  | 0  | 8  | 42.020 | 1,1 | 44.70317 | 6.76633 | 10.350 | 158 | 82 | -122 D |
| 2013 | 10 | 15 | 2  | 47 | 13.840 | 3,7 | 44.42650 | 7.29483 | 15.330 | 355 | 84 | -155 C |
| 2013 | 10 | 19 | 7  | 34 | 55.300 | 1,4 | 44.26883 | 6.49617 | 10.490 | 143 | 78 | -161 D |
| 2013 | 10 | 23 | 20 | 42 | 10.010 | 2,3 | 46.20533 | 7.15467 | 11.320 | 86  | 82 | -148 D |
| 2013 | 10 | 26 | 18 | 57 | 6.280  | 1,8 | 44.42100 | 7.28633 | 15.400 | 3   | 87 | -164 D |
| 2013 | 10 | 31 | 22 | 9  | 35.110 | 3,2 | 43.99533 | 7.53750 | 10.350 | 309 | 80 | 156 D  |
| 2013 | 11 | 10 | 4  | 54 | 10.520 | 2,1 | 44.45333 | 7.28633 | 14.030 | 49  | 55 | 134 D  |
| 2013 | 11 | 11 | 16 | 9  | 42.040 | 1,5 | 44.51083 | 6.70033 | 10.880 | 115 | 42 | 108 D  |
| 2013 | 11 | 20 | 18 | 45 | 54.190 | 1,8 | 44.60767 | 6.91667 | 10.520 | 332 | 43 | -110 D |
| 2013 | 11 | 26 | 23 | 40 | 32.780 | 1,7 | 44.34450 | 6.74050 | 10.580 | 333 | 88 | 174 D  |
| 2013 | 12 | 3  | 14 | 38 | 23.250 | 2,5 | 44.50717 | 7.23017 | 10.290 | 175 | 58 | 121 D  |
| 2013 | 12 | 4  | 11 | 20 | 23.200 | 1,7 | 44.40550 | 6.82417 | 10.670 | 302 | 83 | 174 D  |
| 2013 | 12 | 4  | 22 | 57 | 43.830 | 1,5 | 44.52717 | 7.35150 | 16.550 | 62  | 86 | 174 D  |
| 2013 | 12 | 5  | 20 | 35 | 33.270 | 1,9 | 44.77650 | 7.24367 | 16.650 | 152 | 65 | 170 D  |
| 2013 | 12 | 8  | 6  | 56 | 23.440 | 1,3 | 44.52600 | 6.64417 | 11.000 | 338 | 79 | 180 D  |
| 2013 | 12 | 10 | 10 | 34 | 19.840 | 1,3 | 44.52617 | 6.64417 | 10.340 | 321 | 85 | 148 D  |
| 2013 | 12 | 11 | 10 | 4  | 24.050 | 1,8 | 44.48734 | 6.70683 | 11.430 | 163 | 88 | -154 D |
| 2013 | 12 | 12 | 10 | 34 | 20.990 | 2,3 | 46.21633 | 7.59400 | 6.420  | 337 | 39 | -78 D  |
| 2013 | 12 | 12 | 16 | 48 | 44.330 | 1,4 | 44.51317 | 6.68167 | 11.480 | 197 | 73 | -120 D |
| 2013 | 12 | 17 | 11 | 30 | 56.130 | 2   | 44.36567 | 7.30350 | 17.700 | 326 | 41 | -126 D |
| 2013 | 12 | 18 | 22 | 49 | 49.730 | 2   | 46.32050 | 7.76050 | 11.620 | 277 | 67 | -117 B |
| 2013 | 12 | 18 | 23 | 43 | 5.720  | 1,2 | 44.50617 | 6.69233 | 11.700 | 173 | 87 | -169 D |
| 2013 | 12 | 19 | 8  | 59 | 32.670 | 2,6 | 44.74117 | 6.66917 | 8.220  | 243 | 53 | -110 D |
| 2013 | 12 | 21 | 2  | 44 | 3.840  | 1,4 | 44.50566 | 6.69150 | 11.610 | 317 | 84 | 147 D  |
| 2013 | 12 | 21 | 2  | 45 | 40.450 | 1,2 | 44.50500 | 6.69117 | 11.340 | 291 | 17 | -164 D |
| 2013 | 12 | 21 | 16 | 9  | 21.280 | 3,1 | 44.48100 | 6.72567 | 9.470  | 234 | 68 | -120 D |
| 2013 | 12 | 21 | 16 | 20 | 34.170 | 2,2 | 44.48633 | 6.72100 | 9.540  | 224 | 65 | -137 D |
| 2013 | 12 | 23 | 11 | 23 | 22.390 | 1,4 | 44.48583 | 6.72650 | 9.410  | 76  | 63 | -102 D |
| 2014 | 1  | 27 | 14 | 22 | 24.900 | 1,4 | 44.47766 | 6.69767 | 11.490 | 8   | 87 | 161 D  |
| 2014 | 4  | 7  | 19 | 26 | 58.970 | 4,8 | 44.50583 | 6.69133 | 12.140 | 160 | 66 | -153 C |
| 2014 | 4  | 8  | 0  | 25 | 21.270 | 2,1 | 44.48117 | 6.71100 | 8.730  | 167 | 29 | 126 D  |
| 2014 | 5  | 5  | 23 | 15 | 4.770  | 2,3 | 44.48017 | 6.71117 | 9.250  | 183 | 75 | -167 C |
| 2014 | 6  | 22 | 1  | 32 | 14.230 | 3,6 | 44.51033 | 6.68933 | 10.700 | 18  | 38 | -69 A  |
| 2014 | 7  | 14 | 3  | 9  | 24.360 | 3,5 | 44.51266 | 6.68400 | 11.480 | 154 | 64 | -121 B |
| 2014 | 9  | 12 | 21 | 26 | 36.040 | 3,1 | 44.49900 | 6.70883 | 10.580 | 174 | 85 | -131 D |
| 2015 | 2  | 10 | 5  | 39 | 10.390 | 3   | 44.54583 | 6.67167 | 10.170 | 185 | 67 | -132 D |
