# Supplementary material for: Present-day geodynamics of the Western Alps: new insights from earthquake mechanisms
Source: Copernicus journal article supplement (doi:10.5194/se-12-1661-2021), 2021-07-21
Supplement: Supplementary file [file se-12-1661-2021-supplement-title-page.pdf › se-12-1661-2021-supplement-title-page.pdf]

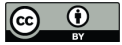

*Supplement of*

## **Present-day geodynamics of the Western Alps: new insights from earthquake mechanisms**

**Marguerite Mathey et al.**

*Correspondence to:* Marguerite Mathey ([marguerite.mathey@univ-grenoble-alpes.fr](mailto:marguerite.mathey@univ-grenoble-alpes.fr))

- [se-12-1661-2021-supplement-title-page.pdf](#)
- [Supplementary \\_revised090621](#)
  - [Supplementary\\_revised2.pdf](#)
  - [computedFM\\_HASHformat.inp](#)
  - [liste\\_meca.txt](#)

The copyright of individual parts of the supplement might differ from the article licence.
